# Supplementary material for: Highly enantioselective one-pot sequential synthesis of valerolactones and pyrazolones bearing all-carbon quaternary stereocentres
Source: Royal Society of Chemistry journal article supplement (doi:10.1039/d0ob02489a), 2021-01-01
Supplement: d0ob02489a1.pdf [file d0ob02489a1.pdf]

## Supporting Information

### Highly Enantioselective One-Pot Sequential Synthesis of Valerolactones and Pyrazolones Bearing All-Carbon Quaternary Stereocenters

Yan-Li Xu,<sup>†</sup> Zhou-Zhou Qin,<sup>†</sup> Yu-Xia Wang,<sup>†</sup> Peng-Fei Zhao,<sup>†</sup> Hong-Feng Li,<sup>†</sup> Zhi-Hong Du,<sup>†</sup>  
Chao-Shan Da<sup>†,‡,\*</sup>

<sup>†</sup> Institute of Biochemistry and Molecular Biology, School of Life Sciences, Lanzhou University,  
Lanzhou 730000, China

<sup>‡</sup> State Key Laboratory of Applied Organic Chemistry, and Key Lab of Preclinical Study for New  
Drugs of Gansu Province, Lanzhou University, Lanzhou 730000, China

dachaoshan@lzu.edu.cn

## Table of Contents

|                                                                                                                                               |    |
|-----------------------------------------------------------------------------------------------------------------------------------------------|----|
| 1. General Experimental Details .....                                                                                                         | 2  |
| 2. Preparation and characterization of catalysis <b>L1-L5</b> .....                                                                           | 3  |
| 3. Preparation of catalyst <b>L6-L9</b> .....                                                                                                 | 4  |
| 4. General procedure for the catalytic asymmetric synthesis of enantioenriched $\alpha$ -acyl- $\alpha$ -alkyl $\delta$ -valerolactones ..... | 5  |
| 5. Characterization of compounds <b>3a – 3y, 3<math>\alpha</math>, 3<math>\beta</math></b> .....                                              | 6  |
| 6. Gram-scale procedure for the preparation of ( <i>S</i> ) – <b>3p</b> .....                                                                 | 33 |
| 7. General procedure for the catalytic one-pot asymmetric synthesis of 4,4-dialkyl pyrazolones <b>4</b> .....                                 | 34 |
| 8. Characterization of compounds <b>4</b> .....                                                                                               | 35 |
| 9. Gram-scale procedure for the preparation of ( <i>S</i> ) - <b>4f</b> .....                                                                 | 45 |
| 10. Exploration of the process of the pyrazolone formation .....                                                                              | 46 |
| 11. Single crystal data, structural refinement and measurement of <b>3p</b> .....                                                             | 47 |
| 12. Single crystal data, structural refinement and measurement of <b>4f</b> .....                                                             | 49 |
| 13. Copies of NMR spectra.....                                                                                                                | 51 |
| 14. References.....                                                                                                                           | 94 |

## 1. General Experimental Details

### Instrumentations

All reactions were carried out in vials and stirred with a magnetic bar without inert atmosphere unless specified. The reactions were monitored by TLC (thin layer chromatography) method; column and preparative TLC purification were carried out using silica gel. All commercial reagents were purchased with the analysis purity grade. They were used without further purification unless specified. Melting points were uncorrected and recorded on XT- 5 melting point apparatus.

NMR spectra were acquired on a Bruker 400/600 spectrometer, running at 400/600 MHz and 100/151 MHz for  $^1\text{H}$  and  $^{13}\text{C}$ , respectively. NMR in  $\text{CDCl}_3$ ,  $\text{DMSO-d}_6$  with TMS as an internal standard, chemical shifts ( $\delta$ ) are reported in ppm relative to residual solvent signals ( $\text{CDCl}_3$ , 7.26 ppm for  $^1\text{H}$  NMR and 77.00 ppm for  $^{13}\text{C}$  NMR;  $\text{DMSO-d}_6$ , 2.50 ppm for  $^1\text{H}$  NMR, 40.00 ppm for  $^{13}\text{C}$  NMR). The following abbreviations are used to describe peak patterns when appropriate: s (singlet), d (doublet), t (triplet), q (quartet), quint (quintet), sept (septuplet), m (multiplet), br (broad). High Resolution Mass Spectra (HR-MS) were measured with ESI-Orbitrap mass spectrometer. Enantiomeric excess (ee) were decided with chiral HPLC, Waters 1525 Binary HPLC Pump/Waters 2998 Photodiode Array Detector of Lanzhou University State Key Laboratory of Applied Organic Chemistry.

Crystal data was collected by SuperNova, Dual, Cu at zero, Eos diffractometer, the structure was solved with the ShelXS structure solution program using Direct Methods and refined with the ShelXL refinement package using Least Squares minimisation. All products in this text, if not stated otherwise, are oily liquids.

The  $\alpha$ -acyl  $\delta$ -valerolactone was prepared according to the disclosed method in literature.<sup>1</sup> The vinyl ketone was prepared according to the reported procedure.<sup>2</sup>

## 2. Preparation and characterization of catalysis L

**Thiourea L1** was prepared by the literature procedure.<sup>3</sup>

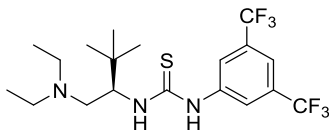

**L1:** White solid, mp 114.5 – 114.8 °C,  $[\alpha]_D^{24} = -13.0$  (c 1.0, CHCl<sub>3</sub>); <sup>1</sup>H NMR (600 MHz, CDCl<sub>3</sub>) δ 13.14 (s, 1 H), 8.00 (s, 2 H), 7.58 (s, 1 H), 6.24 (d, *J* = 6.0 Hz, 1 H), 3.44 – 3.42 (m, 1 H), 2.85 – 2.79 (m, 2 H), 2.76 (d, *J* = 13.8 Hz, 1 H), 2.65 – 2.57 (m, 3 H), 1.10 (t, *J* = 7.2 Hz, 6 H), 1.06 (s, 9 H). <sup>19</sup>F NMR (CDCl<sub>3</sub>, 376 MHz) δ - 62.05 (s, 6 F).

**Thiourea L2** was prepared by the literature procedure.<sup>4</sup>

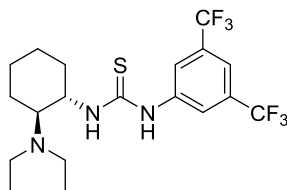

**L2:** White solid, mp 143.7 – 144.3 °C,  $[\alpha]_D^{26} = -25.0$  (c 1.0, CHCl<sub>3</sub>); <sup>1</sup>H NMR (600 MHz, DMSO-d<sub>6</sub>) δ 10.04 (s, 1H), 8.21 (s, 2H), 7.84 (s, 1H), 7.64 (s, 1H), 4.07 (s, 1H), 2.61 – 2.60 (m, 3H), 2.27 (s, 3H), 1.78 – 1.59 (m, 3H), 1.20 – 1.11 (m, 4H), 0.93 (t, *J* = 6.6 Hz, 6H).

**Thiourea L3** was prepared by the literature procedure.<sup>5</sup>

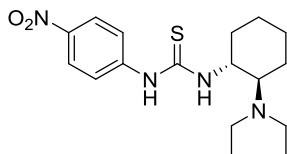

**L3:** Yellow solid, mp 109.9 - 111.7 °C,  $[\alpha]_D^{26} = -41.0$  (c 1.0, CHCl<sub>3</sub>); <sup>1</sup>H NMR (CDCl<sub>3</sub>, 400 MHz) δ 8.19 (d, *J* = 8.0 Hz, 2 H), 7.47 (d, *J* = 8.0 Hz, 2 H), 3.84 (t, *J* = 12.0 Hz, 1 H), 2.53 - 2.75 (m, 4 H), 2.32 - 2.39 (m, 2 H), 1.70 - 1.89 (m, 3 H), 1.06 - 1.23 (m, 4 H), 0.93 - 0.96 (m, 6 H).

**Thiourea L4** was prepared by the literature procedure.<sup>6</sup>

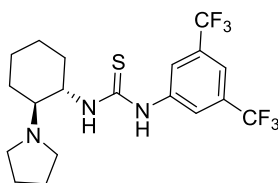

**L4:** White solid, mp 115.9 - 117.6 °C,  $[\alpha]_D^{26} = +3.6$  (c 1.0, CHCl<sub>3</sub>); <sup>1</sup>H NMR (600 MHz, CDCl<sub>3</sub>) δ 7.88 (s, 2H), 7.61 (s, 1H), 2.03 (s, 1H), 1.96 (d, *J* = 10.8 Hz, 1H), 1.86 – 1.65 (m, 9H), 1.41 – 1.14 (m, 8H).

**Thiourea L5** was prepared by the literature procedure.<sup>7</sup>

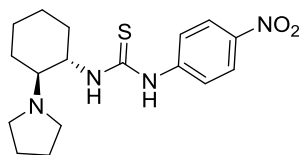

**L5:** Yellow solid, mp 133.5 - 134.1 °C,  $[\alpha]_D^{24} = +11.0$  (c 1.0, CHCl<sub>3</sub>); <sup>1</sup>H NMR (600 MHz, DMSO-d<sub>6</sub>) δ 10.04 (s, 1 H), 8.34 (s, 1 H), 8.11 (d, *J* = 9.0 Hz, 2 H), 7.78 (d, *J* = 9.6 Hz, 2 H), 4.14 (s, 1 H), 2.70 –

2.47 (m, 5 H), 2.11 (d,  $J = 9.0$  Hz, 1 H), 1.77 (d,  $J = 12.0$  Hz, 1 H), 1.71 – 1.58 (m, 6 H), 1.37 – 1.14 (m, 4 H).

### 3. Preparation of catalyst L6 - L9.<sup>5</sup>

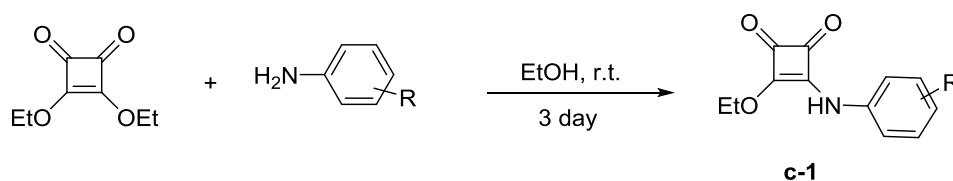

Dissolved substituted aniline (5.0 mmol) in dry ethanol, slowly added dropwise anhydrous ethanol solution of diethyl squarate (5.5 mmol, 935 mg) in the ethanol mixture, stirred at room temperature for three days. The mixture was directly filtered to obtain product after the reaction finished with the TLC check. The filtered product was directly used in the following steps without further purification.

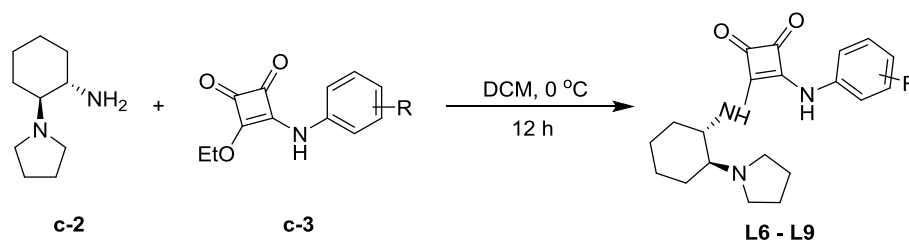

Added a solution of **c-2** (3.3 mmol, 554 mg) in DCM (2.0 mL) to **c-3** (3.3 mmol) in anhydrous DCM (5.0 mL) at 0 °C, slowly warmed up the reaction mixture to room temperature and stirred for 12 h to complete checked by TLC. The mixture was concentrated under reduced pressure, and the resulted residue was purified by preparative silica gel column chromatography (DCM : MeOH = 20:1) to obtain the squaramides **L6 - L9**.

#### Squaramide L6.<sup>5</sup>

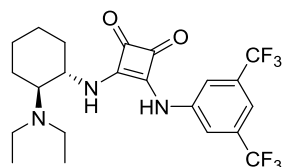

**L6:** White solid, mp 232.5 – 233.1 °C,  $[\alpha]_D^{26} = -16.2$  (c 0.50, EtOH);  $^1\text{H NMR}$  (600 MHz,  $\text{CDCl}_3$ )  $\delta$  7.95 (s, 2H), 7.40 (s, 1H), 4.12 (s, 1H), 2.66 (s, 2H), 2.43 (s, 2H), 2.16 – 1.73 (m, 5H), 1.50 – 1.19 (m, 5H), 0.96 (s, 6H).

#### Squaramide L7.<sup>8</sup>

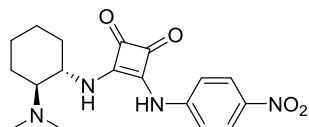

**L7:** Yellow solid, mp 191.8 - 192.3 °C,  $[\alpha]_D^{24} = -15.0$  (c 1.0,  $\text{CHCl}_3$ );  $^1\text{H NMR}$  (600 MHz,  $\text{DMSO-d}_6$ )  $\delta$  10.70 (s, 1 H), 8.19 (d,  $J = 8.4$  Hz, 2 H), 7.64 (d,  $J = 8.4$  Hz, 2 H), 3.92 (s, 1 H), 2.28 (s, 6 H), 2.06 (d,  $J = 12.0$  Hz, 1 H), 1.88 (s, 1H), 1.74 (s, 1 H), 1.65 (s, 1 H), . 1.43 – 1.19 (m, 6H).

#### Squaramide L8.<sup>9</sup>

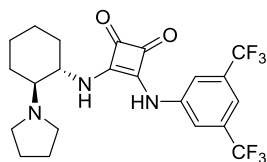

**L8:** Yellow solid, mp 238.0 - 238.9 °C,  $[\alpha]_D^{24} = +2.0$  (c 1.0, CHCl<sub>3</sub>); <sup>1</sup>H NMR (600 MHz, DMSO-d<sub>6</sub>) δ 10.15 (s, 1 H), 8.03 (s, 2 H), 7.74 (s, 1 H), 7.61 (s, 1 H), 3.94 (s, 1 H), 2.60 (d, *J* = 7.2 Hz, 2 H), 2.51 – 2.47 (m, 2 H), 2.02 (s, 1 H), 1.80 – 1.78 (m, 1 H), 1.71 – 1.69 (m, 1 H), 1.60 – 1.56 (m, 5 H), 1.39 – 1.23 (m, 4 H).

### Squaramide L9

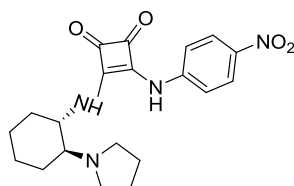

**L9:** A red-brown solid (775 mg, 61% yield), mp 179.5 - 180.2 °C,  $[\alpha]_D^{24} = -33.0$  (c 1.0, CHCl<sub>3</sub>); <sup>1</sup>H NMR (600 MHz, DMSO-d<sub>6</sub>) δ 10.47 (s, 1 H), 8.21 (d, *J* = 7.8 Hz, 2 H), 7.66 (d, *J* = 8.4 Hz, 2 H), 4.03 (q, *J* = 14.4, 7.2 Hz, 1 H), 2.72 (s, 4 H), 2.04 (d, *J* = 10.2 Hz, 1 H), 1.91 (s, 1 H), 1.73 – 1.67 (m, 7 H), 1.47 – 1.43 (m, 3 H), 1.36 – 1.27 (m, 3 H). <sup>13</sup>C NMR (150 MHz, DMSO-d<sub>6</sub>) δ 185.5, 180.3, 170.3, 162.3, 145.8, 141.8, 126.1, 118.1, 62.8, 55.9, 48.0, 33.0, 23.8, 23.2. HRMS (ESI-Orbitrap) *m/z*:  $[M+H]^+$  Calcd for C<sub>20</sub>H<sub>25</sub>N<sub>4</sub>O<sub>4</sub> 385.1880, found 385.1870.

### 4. General procedure for the catalytic asymmetric synthesis of enantioenriched $\alpha$ -acyl- $\alpha$ -alkyl $\delta$ -valerolactones

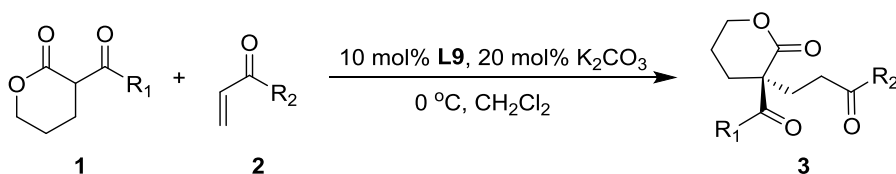

To the mixture of the lactone **1** (0.1 mmol), the catalyst **L9** (3.8 mg, 0.01 mmol), and K<sub>2</sub>CO<sub>3</sub> (2.76 mg, 0.02 mmol) in analytical purity grade dichloromethane (0.5 mL) was added the vinyl ketone **2** (0.12 mmol). The reaction was stirred for 3 to 6 days at 0 °C to complete checked by TLC. The mixture was directly submitted to preparative silica gel column chromatography (petroleum ether : ethyl acetate = 8:1 to 3:1) to furnish the  $\alpha$ -acyl- $\alpha$ -alkyl  $\delta$ -valerolactones **3**.

## 5. Characterization of compounds 3a – 3y, 3 $\alpha$ , 3 $\beta$ .

### (S)-3-Benzoyl-3-(3-oxo-3-phenylpropyl)tetrahydro-2H-pyran-2-one (3a)

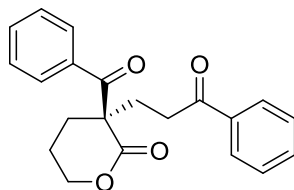

The title compound was purified by column chromatography on silica gel (PE : EA = 8:1 to 3:1), 30.2 mg, 90% yield, colorless oil,  $[\alpha]_D^{24} = +3.0$  (c 1.0, CHCl<sub>3</sub>); <sup>1</sup>H NMR (300 MHz, CDCl<sub>3</sub>)  $\delta$  7.88 – 7.81 (m, 4 H), 7.50 – 7.30 (m, 6 H), 4.40 – 4.33 (m, 1 H), 4.18 – 4.09 (m, 1 H), 3.13 – 2.88 (m, 2 H), 2.69 – 2.59 (m, 1 H), 2.49 (t, *J* = 7.8 Hz, 2 H), 2.10 – 1.85 (m, 2 H), 1.77 – 1.68 (m, 1 H). <sup>13</sup>C NMR (100 MHz, CDCl<sub>3</sub>)  $\delta$  199.0, 196.2, 172.5, 136.6, 134.7, 133.4, 133.1, 129.0, 128.8, 128.5, 128.0, 68.1, 57.3, 33.8, 30.6, 28.9, 19.8. HRMS (ESI-Orbitrap) *m/z*: [M+H]<sup>+</sup> Calcd for C<sub>21</sub>H<sub>21</sub>O<sub>4</sub> 377.1434; found 377.1438. The ee was determined by HPLC analysis. CHIRALPAK AS-H; Hexane/2-propanol = 80/20; flow rate 1.0 mL/min; 242.8 nm; retention time: 17.8 min (minor) and 21.2 min (major)

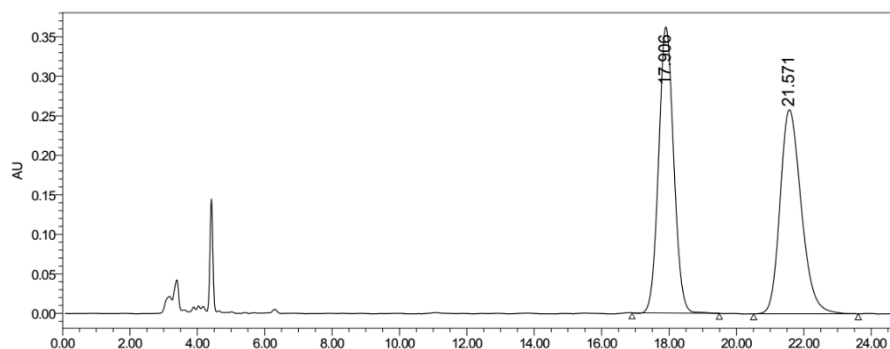

|   | Name | retention time<br>(min) | Area<br>( $\mu$ V*s) | Height<br>( $\mu$ V) | % Area |
|---|------|-------------------------|----------------------|----------------------|--------|
| 1 |      | 17.906                  | 11241832             | 362001               | 49.93  |
| 2 |      | 21.571                  | 11274395             | 258261               | 50.07  |

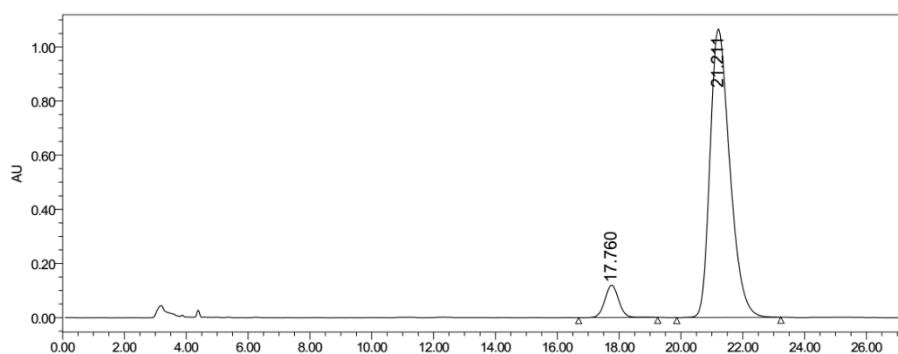

|   | Name | Retention time<br>(min) | Area<br>( $\mu$ V*s) | Height<br>( $\mu$ V) | % Area |
|---|------|-------------------------|----------------------|----------------------|--------|
| 1 |      | 17.760                  | 3691208              | 119209               | 7.23   |
| 2 |      | 21.211                  | 47370728             | 1064628              | 92.77  |

**(S)-3-(2-Chlorobenzoyl)-3-(3-oxo-3-phenylpropyl)tetrahydro-2H-pyran-2-one (3b)**

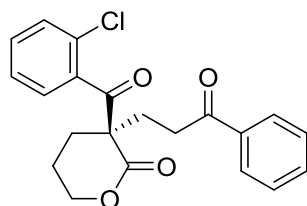

The title compound was purified by column chromatography on silica gel (PE : EA = 8:1 to 3:1), 36.3 mg, 98% yield, colorless oil,  $[\alpha]_D^{23} = +41.0$  (c 1.0,  $\text{CHCl}_3$ );  $^1\text{H NMR}$  (600 MHz,  $\text{CDCl}_3$ )  $\delta$  7.96 – 7.94 (m, 2 H), 7.57 – 7.55 (m, 1 H), 7.46 (t,  $J = 7.8$  Hz, 2 H), 7.43 – 7.40 (m, 2 H), 7.39 – 7.36 (m, 1 H), 7.32 – 7.29 (m, 1 H), 4.46 – 4.42 (m, 1 H), 4.41 – 4.37 (m, 1 H), 3.17 – 3.07 (m, 2 H), 2.64 – 2.55 (m, 2 H), 2.50 – 2.45 (m, 1 H), 2.06 – 1.94 (m, 3 H).  $^{13}\text{C NMR}$  (150 MHz,  $\text{CDCl}_3$ )  $\delta$  200.4, 198.6, 170.3, 138.0, 136.5, 133.2, 131.2, 130.5, 130.3, 128.6, 128.1, 127.5, 126.7, 69.9, 60.3, 33.8, 30.7, 28.1, 20.5. HRMS (ESI-Orbitrap)  $m/z$ :  $[\text{M}+\text{H}]^+$  Calcd for  $\text{C}_{21}\text{H}_{20}\text{ClO}_4$  371.1045, found 371.1053.

The ee was determined by HPLC analysis. CHIRALPAK AS-H; Hexane/2-propanol = 70/30; flow rate 1.0 mL/min; 240.4 nm; retention time: 14.1 min (minor) and 16.1 min (major)

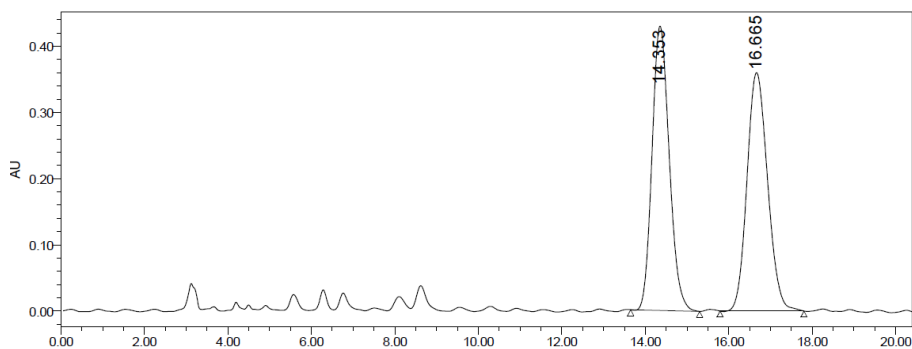

|   | Name | Retention time<br>(min) | Area<br>( $\mu\text{V}\cdot\text{s}$ ) | Height<br>( $\mu\text{V}$ ) | % Area |
|---|------|-------------------------|----------------------------------------|-----------------------------|--------|
| 1 |      | 14.353                  | 12283881                               | 429427                      | 49.86  |
| 2 |      | 16.665                  | 12355188                               | 360151                      | 50.14  |

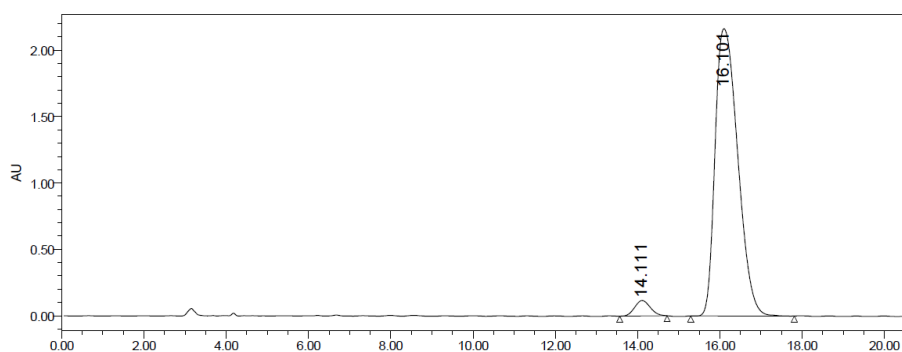

|   | Name | Retention time<br>(min) | Area<br>( $\mu\text{V}\cdot\text{s}$ ) | Height<br>( $\mu\text{V}$ ) | % Area |
|---|------|-------------------------|----------------------------------------|-----------------------------|--------|
| 1 |      | 14.111                  | 3059447                                | 116380                      | 3.57   |
| 2 |      | 16.101                  | 82722098                               | 2164615                     | 96.43  |



**(S)-3-(3-Chlorobenzoyl)-3-(3-oxo-3-phenylpropyl)tetrahydro-2H-pyran-2-one (3c)**

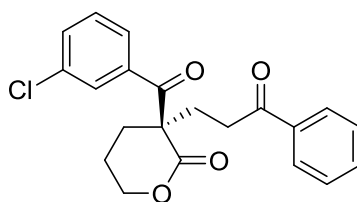

The title compound was purified by column chromatography on silica gel (PE : EA = 8:1 to 3:1), 36.6 mg, 99% yield, colorless oil,  $[\alpha]_D^{23} = +18.0$  (c 1.0,  $\text{CHCl}_3$ );  $^1\text{H NMR}$  (600 MHz,  $\text{CDCl}_3$ )  $\delta$  7.94 – 7.92 (m, 2 H), 7.83 – 7.81 (m, 1 H), 7.56 – 7.53 (m, 2 H), 7.48 – 7.42 (m, 2 H), 7.40 (t,  $J = 7.8$  Hz, 1 H), 4.51 – 4.47 (m, 1 H), 4.27 – 4.23 (m, 1 H), 3.19 – 3.14 (m, 1 H), 3.06 – 3.00 (m, 1 H), 2.70 – 2.66 (m, 1 H), 2.60 – 2.57 (m, 2 H), 2.23 – 2.12 (m, 1 H), 2.03 – 1.97 (m, 1 H), 1.87 – 1.82 (m, 1 H).  $^{13}\text{C NMR}$  (150 MHz,  $\text{CDCl}_3$ )  $\delta$  198.9, 195.2, 172.0, 136.6, 136.4, 135.2, 133.3, 133.2, 130.0, 129.2, 128.6, 128.0, 126.8, 68.4, 57.3, 33.7, 30.6, 29.0, 19.8. HRMS (ESI-Orbitrap)  $m/z$ :  $[\text{M}+\text{H}]^+$  Calcd for  $\text{C}_{21}\text{H}_{20}\text{ClO}_4$  371.1042, found 371.1045.

The ee was determined by HPLC analysis. CHIRALPAK AS-H; Hexane/2-propanol = 70/30; flow rate 1.0 mL/min; 242.8 nm; retention time: 12.0 min (minor) and 14.5 min (major)

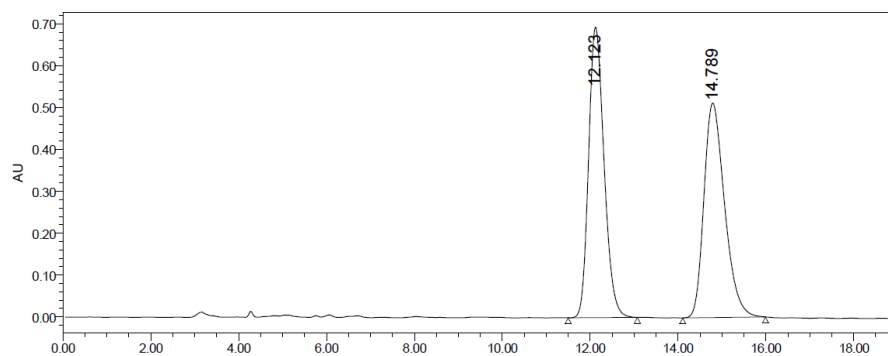

| Name | Retention time (min) | Area ( $\mu\text{V}\cdot\text{s}$ ) | Height ( $\mu\text{V}$ ) | % Area |
|------|----------------------|-------------------------------------|--------------------------|--------|
| 1    | 12.123               | 16899493                            | 693231                   | 50.19  |
| 2    | 14.789               | 16772410                            | 512078                   | 49.81  |

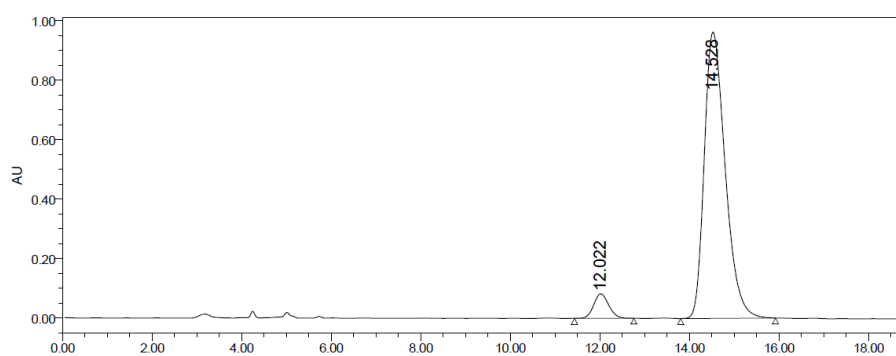

| Name | Retention time (min) | Area ( $\mu\text{V}\cdot\text{s}$ ) | Height ( $\mu\text{V}$ ) | % Area |
|------|----------------------|-------------------------------------|--------------------------|--------|
| 1    | 12.022               | 1918255                             | 82695                    | 5.78   |
| 2    | 14.528               | 31288316                            | 963520                   | 94.22  |

**(S)-3-(4-Chlorobenzoyl)-3-(3-oxo-3-phenylpropyl)tetrahydro-2H-pyran-2-one (3d)**

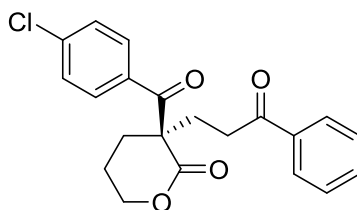

The title compound was purified by column chromatography on silica gel (PE : EA = 8:1 to 3:1), 36.6 mg, 99% yield, colorless oil,  $[\alpha]_D^{23} = +27.0$  (c 1.0,  $\text{CHCl}_3$ );  $^1\text{H NMR}$  (600 MHz,  $\text{CDCl}_3$ )  $\delta$  7.92 – 7.91 (m, 4 H), 7.55 – 7.53 (m, 1 H), 7.44 – 7.42 (m, 4 H), 4.48 – 4.44 (m, 1 H), 4.22 – 4.18 (m, 1 H), 3.18 – 3.12 (m, 1 H), 3.04 – 2.98 (m, 1 H), 2.73 – 2.68 (m, 1 H), 2.58 (t,  $J = 7.2$  Hz, 2 H), 2.18 – 2.10 (m, 1 H), 2.02 – 1.96 (m, 1 H), 1.84 – 1.80 (m, 1 H).  $^{13}\text{C NMR}$  (150 MHz,  $\text{CDCl}_3$ )  $\delta$  198.8, 195.0, 172.3, 140.0, 136.6, 133.1, 133.0, 130.4, 129.1, 128.5, 128.0, 68.2, 57.3, 33.7, 30.6, 28.7, 19.8. HRMS (ESI-Orbitrap)  $m/z$ :  $[\text{M}+\text{H}]^+$  Calcd for  $\text{C}_{21}\text{H}_{20}\text{ClO}_4$  371.1042, found 371.1045.

The ee was determined by HPLC analysis. CHIRALPAK AS-H; Hexane/2-propanol = 70/30; flow rate 1.0 mL/min; 247.5 nm; retention time: 13.5 min (minor) and 14.9 min (major)

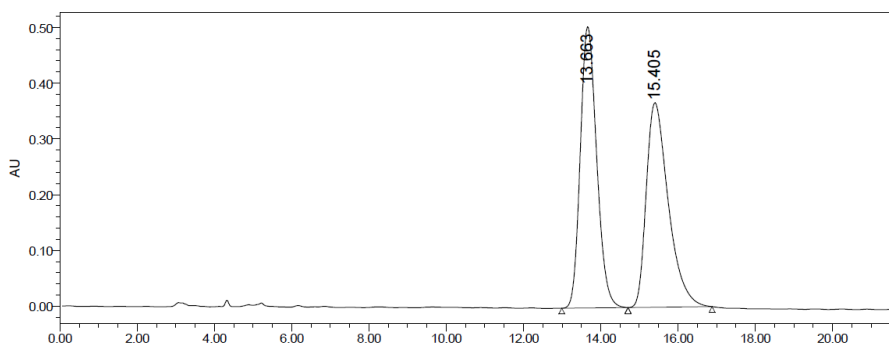

| Name | Retention time (min) | Area ( $\mu\text{V}\cdot\text{s}$ ) | Height ( $\mu\text{V}$ ) | % Area |
|------|----------------------|-------------------------------------|--------------------------|--------|
| 1    | 13.663               | 14853131                            | 504310                   | 50.52  |
| 2    | 15.405               | 14548808                            | 366722                   | 49.48  |

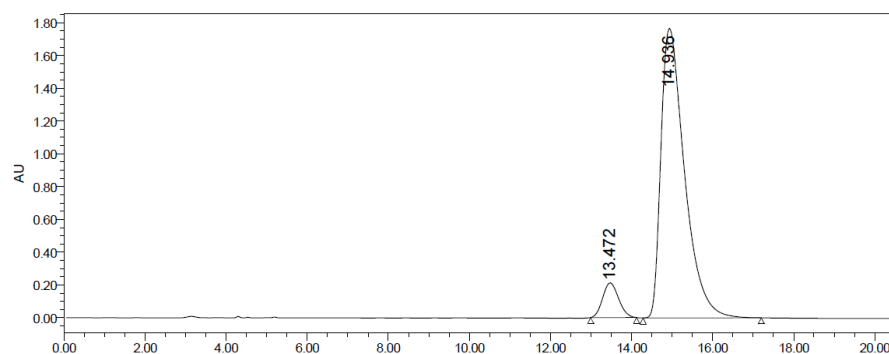

| Name | Retention time (min) | Area ( $\mu\text{V}\cdot\text{s}$ ) | Height ( $\mu\text{V}$ ) | % Area |
|------|----------------------|-------------------------------------|--------------------------|--------|
| 1    | 13.472               | 5753712                             | 210905                   | 7.48   |
| 2    | 14.936               | 71182206                            | 1765022                  | 92.52  |

**(S)-3-(4-Bromobenzoyl)-3-(3-oxo-3-phenylpropyl)tetrahydro-2H-pyran-2-one (3e)**

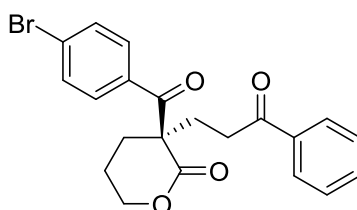

The title compound was purified by column chromatography on silica gel (PE : EA = 8:1 to 3:1), 39.6 mg, 96% yield, colorless oil,  $[\alpha]_D^{23} = +52.0$  (c 1.0,  $\text{CHCl}_3$ );  $^1\text{H}$  NMR (600 MHz,  $\text{CDCl}_3$ )  $\delta$  7.88 – 7.86 (m, 2 H), 7.72 – 7.70 (m, 2 H), 7.51 – 7.48 (m, 3 H), 7.39 (t,  $J = 7.8$  Hz, 2 H), 4.41 – 4.38 (m, 1 H), 4.20 – 4.16 (m, 1 H), 3.08 – 3.02 (m, 1 H), 2.97 – 2.91 (m, 1 H), 2.66 – 2.61 (m, 1 H), 2.53 – 2.45 (m, 2 H), 2.11 – 2.03 (m, 1 H), 1.95 – 1.89 (m, 1 H), 1.77 – 1.73 (m, 1 H).  $^{13}\text{C}$  NMR (150 MHz,  $\text{CDCl}_3$ )  $\delta$  198.0, 196.2, 172.3, 135.3, 134.7, 133.4, 131.8, 129.6, 129.0, 128.8, 128.2, 68.3, 57.1, 33.8, 30.5, 29.1, 19.8. HRMS (ESI-Orbitrap)  $m/z$ :  $[\text{M}+\text{H}]^+$  Calcd for  $\text{C}_{21}\text{H}_{20}\text{BrO}_4$  415.0537, found 415.0539.

The ee was determined by HPLC analysis. CHIRALPAK AS-H; Hexane/2-propanol = 70/30; flow rate 1.0 mL/min; 247.5 nm; retention time: 13.6 min (minor) and 15.2 min (major)

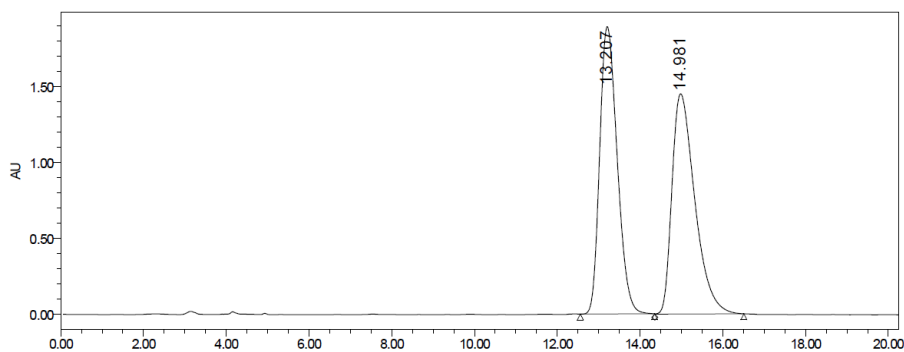

|   | Name | Retention time (min) | Area ( $\mu\text{V}\cdot\text{s}$ ) | Height ( $\mu\text{V}$ ) | % Area |
|---|------|----------------------|-------------------------------------|--------------------------|--------|
| 1 |      | 13.207               | 55596224                            | 1894236                  | 49.96  |
| 2 |      | 14.981               | 55688384                            | 1452224                  | 50.04  |

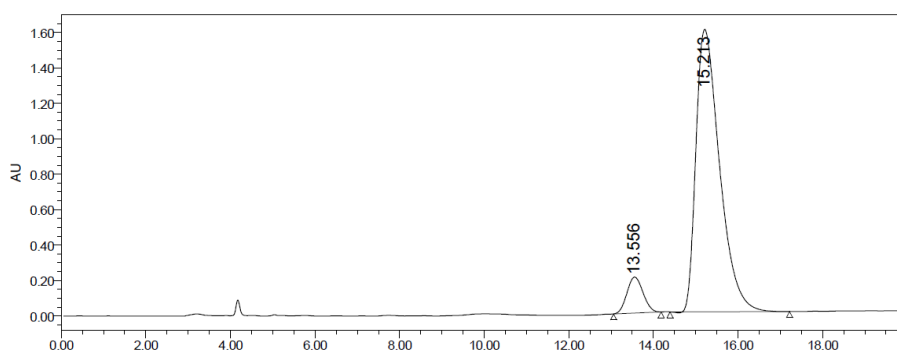

|   | Name | Retention time (min) | Area ( $\mu\text{V}\cdot\text{s}$ ) | Height ( $\mu\text{V}$ ) | % Area |
|---|------|----------------------|-------------------------------------|--------------------------|--------|
| 1 |      | 13.556               | 5349285                             | 202728                   | 7.95   |
| 2 |      | 15.213               | 61915332                            | 1593212                  | 92.05  |

**(S)-3-(3-Oxo-3-phenylpropyl)-3-(4-(trifluoromethyl)benzoyl)tetrahydro-2H-pyran-2-one (3f)**

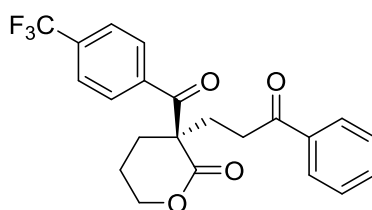

The title compound was purified by column chromatography on silica gel (PE : EA = 8:1 to 3:1), 40.0 mg, 99% yield, colorless oil,  $[\alpha]_D^{23} = +6.0$  (c 1.0,  $\text{CHCl}_3$ );  $^1\text{H}$  NMR (600 MHz,  $\text{CDCl}_3$ )  $\delta$  8.04 (d,  $J = 8.4$  Hz, 2 H), 7.92 (d,  $J = 7.2$  Hz, 2 H), 7.72 (d,  $J = 8.4$  Hz, 2 H), 7.54 (t,  $J = 7.2$  Hz, 1 H), 7.43 (t,  $J = 7.8$  Hz, 2 H), 4.52 – 4.49 (m, 1 H), 4.32 – 4.24 (m, 1 H), 3.20 – 3.15 (m, 1 H), 3.07 – 3.01 (m, 1 H), 2.69 – 2.63 (m, 1 H), 2.62 – 2.56 (m, 2 H), 2.22 – 2.13 (m, 1 H), 2.04 – 1.99 (m, 1 H), 1.90 – 1.85 (m, 1 H).  $^{13}\text{C}$  NMR (150 MHz,  $\text{CDCl}_3$ )  $\delta$  198.8, 195.8, 171.8, 142.9, 137.8, 136.6, 134.6, 134.4, 133.2, 129.3, 128.8, 128.6, 128.0, 125.8, 124.3, 122.5, 68.5, 57.5, 33.7, 30.5, 28.9, 19.9. HRMS (ESI-Orbitrap)  $m/z$ :  $[\text{M}+\text{H}]^+$  Calcd for  $\text{C}_{22}\text{H}_{20}\text{F}_3\text{O}_4$  405.1309, found 405.1308.

The ee was determined by HPLC analysis. CHIRALPAK OD-H; Hexane/2-propanol = 65/35; flow rate 1.0 mL/min; 279.5 nm; retention time: 7.4 min (minor) and 8.8 min (major)

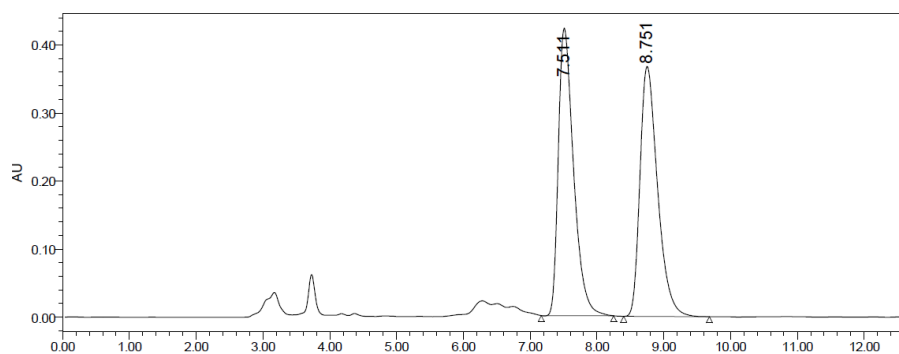

|   | Name | Retention time (min) | Area ( $\mu\text{V}\cdot\text{s}$ ) | Height ( $\mu\text{V}$ ) | % Area |
|---|------|----------------------|-------------------------------------|--------------------------|--------|
| 1 |      | 7.511                | 6698140                             | 422577                   | 49.88  |
| 2 |      | 8.751                | 6730381                             | 367656                   | 50.12  |

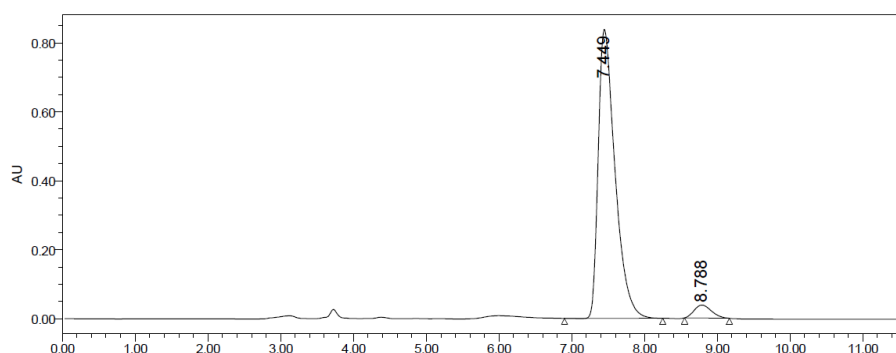

|   | Name | Retention time (min) | Area ( $\mu\text{V}\cdot\text{s}$ ) | Height ( $\mu\text{V}$ ) | % Area |
|---|------|----------------------|-------------------------------------|--------------------------|--------|
| 1 |      | 7.449                | 13430563                            | 837477                   | 95.56  |
| 2 |      | 8.788                | 623759                              | 37786                    | 4.44   |

**(S)-3-(4-Methylbenzoyl)-3-(3-oxo-3-phenylpropyl)tetrahydro-2H-pyran-2-one (3g)**

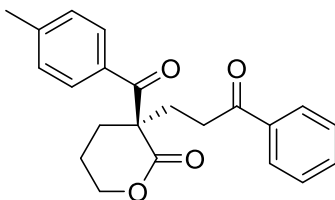

The title compound was purified by column chromatography on silica gel (PE : EA = 8:1 to 3:1), 31.9 mg, 91% yield, white solid, mp 209.6 - 201.7 °C,  $[\alpha]_D^{23} = +60.0$  (c 1.0, CHCl<sub>3</sub>); <sup>1</sup>H NMR (600 MHz, CDCl<sub>3</sub>) δ 7.93 – 7.91 (m, 2 H), 7.88 (d, *J* = 8.4 Hz, 2 H), 7.54 – 7.52 (m, 1 H), 7.42 (t, *J* = 7.8 Hz, 2 H), 7.25 (d, *J* = 8.4 Hz, 2 H), 4.44 – 4.40 (m, 1 H), 4.21 – 4.16 (m, 1 H), 3.17 – 3.11 (m, 1 H), 3.05 – 2.99 (m, 1 H), 2.79 – 2.74 (m, 1 H), 2.59 – 2.56 (m, 2 H), 2.40 (s, 3 H), 2.15 – 2.08 (m, 1 H), 2.00 – 1.95 (m, 1 H), 1.81 – 1.77 (m, 1 H). <sup>13</sup>C NMR (150 MHz, CDCl<sub>3</sub>) δ 199.0, 195.7, 172.8, 144.5, 136.7, 133.1, 132.2, 129.5, 129.2, 128.5, 128.0, 67.9, 57.3, 33.8, 30.7, 28.7, 21.6, 19.8. HRMS (ESI-Orbitrap) *m/z*: [M+H]<sup>+</sup> Calcd for C<sub>22</sub>H<sub>23</sub>O<sub>4</sub> 351.1588, found 351.1591.

The ee was determined by HPLC analysis. CHIRALPAK AS-H; Hexane/2-propanol = 70/30; flow rate 1.0 mL/min; 247.5 nm; retention time: 11.9 min (minor) and 15.3 min (major)

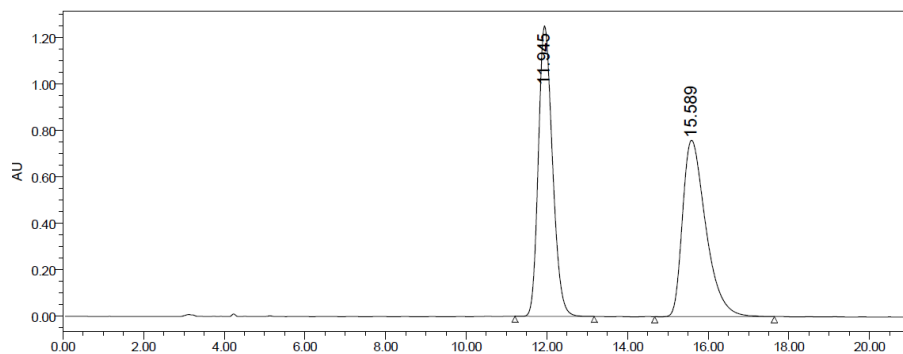

| Name | Retention time (min) | Area (μV*s) | Height (μV) | % Area |
|------|----------------------|-------------|-------------|--------|
| 1    | 11.945               | 30347962    | 1249458     | 49.96  |
| 2    | 15.589               | 30401806    | 759290      | 50.04  |

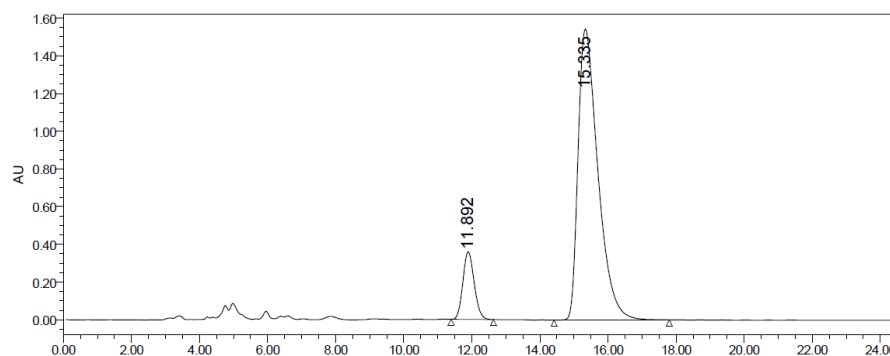

| Name | Retention time (min) | Area (μV*s) | Height (μV) | % Area |
|------|----------------------|-------------|-------------|--------|
| 1    | 11.892               | 8275867     | 358046      | 11.72  |
| 2    | 15.335               | 62349539    | 1542356     | 88.28  |

**(S)-3-(1-Naphthoyl)-3-(3-oxo-3-phenylpropyl)tetrahydro-2H-pyran-2-one (3h)**

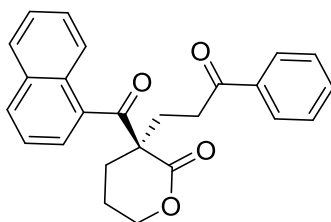

The title compound was purified by column chromatography on silica gel (PE : EA = 8:1 to 3:1), 38.2 mg, 99% yield, white solid, mp 117.6 - 118.0 °C,  $[\alpha]_D^{23} = +1.0$  (c 1.0, CHCl<sub>3</sub>); <sup>1</sup>H NMR (600 MHz, CDCl<sub>3</sub>) δ 8.08 (d, *J* = 8.4 Hz, 1 H), 7.96 (d, *J* = 7.8 Hz, 1 H), 7.92 – 7.90 (m, 2 H), 7.88 (d, *J* = 7.8 Hz, 1 H), 7.80 (d, *J* = 7.2 Hz, 1 H), 7.59 – 7.52 (m, 3 H), 7.47 (t, *J* = 7.8 Hz, 1 H), 7.42 (t, *J* = 7.8 Hz, 2 H), 4.39 – 4.36 (m, 1 H), 4.27 – 4.23 (m, 1 H), 3.24 – 3.19 (m, 1 H), 3.17 – 3.11 (m, 1 H), 2.75 – 2.70 (m, 1 H), 2.66 – 2.61 (m, 1 H), 2.56 – 2.51 (m, 1 H), 2.07 – 1.92 (m, 3 H). <sup>13</sup>C NMR (150 MHz, CDCl<sub>3</sub>) δ 201.1, 198.9, 171.6, 136.6, 134.9, 133.9, 133.1, 132.1, 130.4, 128.8, 128.6, 128.1, 128.0, 126.6, 125.4, 124.8, 124.2, 68.8, 60.3, 34.0, 31.2, 28.8, 20.3. HRMS (ESI-Orbitrap) *m/z*: [M+H]<sup>+</sup> Calcd for C<sub>25</sub>H<sub>23</sub>O<sub>4</sub> 387.1589, found 387.1591.

The ee was determined by HPLC analysis. CHIRALPAK AS-H; Hexane/2-propanol = 70/30; flow rate 1.0 mL/min; 314.7 nm; retention time: 17.1 min (minor) and 20.0 min (major)

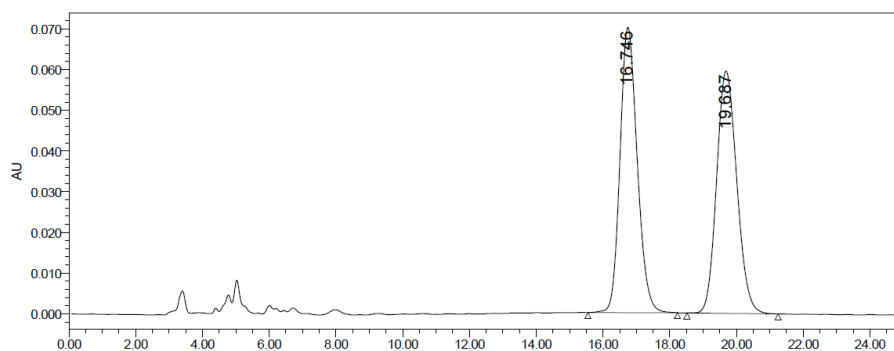

| Name | Retention time (min) | Area (μV*s) | Height (μV) | % Area |
|------|----------------------|-------------|-------------|--------|
| 1    | 16.746               | 2513298     | 70144       | 50.13  |
| 2    | 19.687               | 2500261     | 59560       | 49.87  |

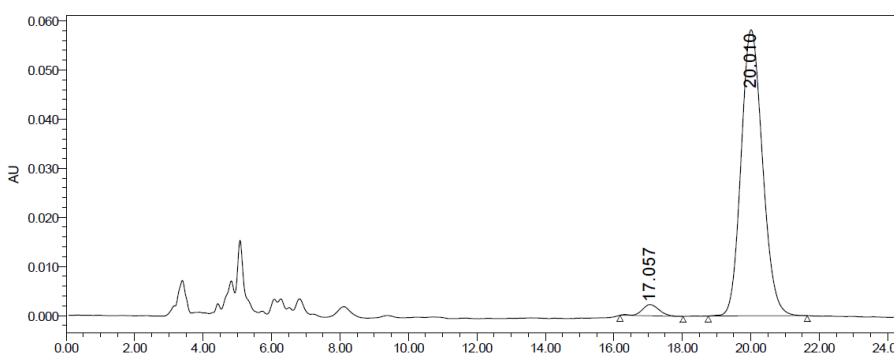

| Name | Retention time (min) | Area (μV*s) | Height (μV) | % Area |
|------|----------------------|-------------|-------------|--------|
| 1    | 17.057               | 77748       | 2277        | 2.99   |
| 2    | 20.010               | 2526781     | 58249       | 97.01  |

**(S)-3-Benzoyl-3-(3-(4-bromophenyl)-3-oxopropyl)tetrahydro-2H-pyran-2-one (3i)**

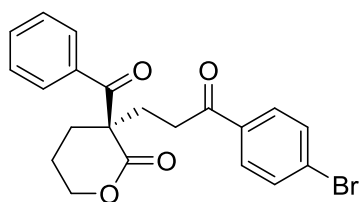

The title compound was purified by column chromatography on silica gel (PE : EA = 8:1 to 3:1), 41.0 mg, 99% yield, colorless oil,  $[\alpha]_D^{23} = +25.0$  (c 1.0,  $\text{CHCl}_3$ );  $^1\text{H NMR}$  (600 MHz,  $\text{CDCl}_3$ )  $\delta$  7.95 – 7.94 (m, 2 H), 7.80 – 7.78 (m, 2 H), 7.59 – 7.55 (m, 2 H), 7.47 – 7.45 (m, 2 H), 4.49 – 4.46 (m, 1 H), 4.28 – 4.23 (m, 1 H), 3.15 – 3.10 (m, 1 H), 3.04 – 2.99 (m, 1 H), 2.74 – 2.69 (m, 1 H), 2.61 – 2.53 (m, 2 H), 2.19 – 2.11 (m, 1 H), 2.03 – 1.97 (m, 1 H), 1.85 – 1.80 (m, 1 H).  $^{13}\text{C NMR}$  (150 MHz,  $\text{CDCl}_3$ )  $\delta$  198.0, 196.2, 172.4, 135.4, 134.7, 133.5, 131.8, 129.6, 129.0, 128.8, 128.3, 68.3, 57.2, 33.9, 30.6, 29.1, 19.8. HRMS (ESI - Orbitrap)  $m/z$ :  $[\text{M}+\text{H}]^+$  Calcd for  $\text{C}_{21}\text{H}_{20}\text{BrO}_4$  415.0547, found 415.0539.

The ee was determined by HPLC analysis. CHIRALPAK AS-H; Hexane/2-propanol = 70/30; flow rate 1.0 mL/min; 252.2 nm; retention time: 14.0 min (minor) and 26.8 min (major)

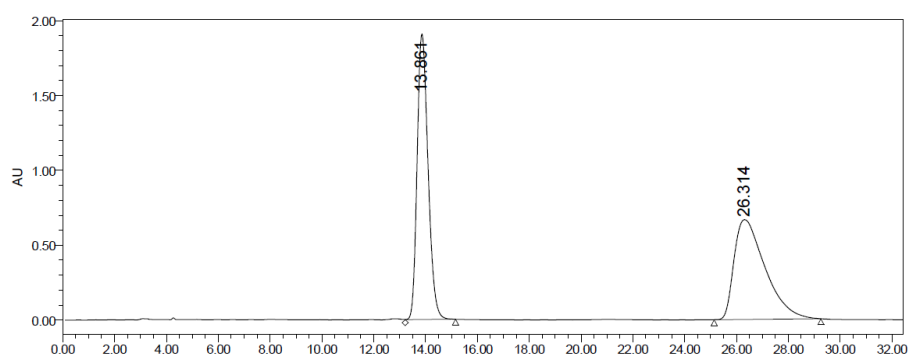

|   | Name | Retention time<br>(min) | Area<br>( $\mu\text{V}\cdot\text{s}$ ) | Height<br>( $\mu\text{V}$ ) | % Area |
|---|------|-------------------------|----------------------------------------|-----------------------------|--------|
| 1 |      | 13.861                  | 55712945                               | 1906143                     | 50.16  |
| 2 |      | 26.314                  | 55361823                               | 666436                      | 49.84  |

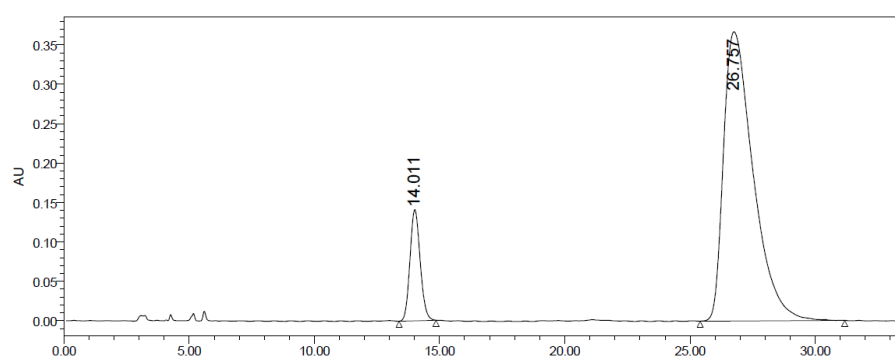

|   | Name | Retention time<br>(min) | Area<br>( $\mu\text{V}\cdot\text{s}$ ) | Height<br>( $\mu\text{V}$ ) | % Area |
|---|------|-------------------------|----------------------------------------|-----------------------------|--------|
| 1 |      | 14.011                  | 3987854                                | 140835                      | 11.65  |
| 2 |      | 26.757                  | 30236625                               | 366875                      | 88.35  |

**(S)-3-Benzoyl-3-(3-(4-methoxyphenyl)-3-oxopropyl)tetrahydro-2H-pyran-2-one (3j)**

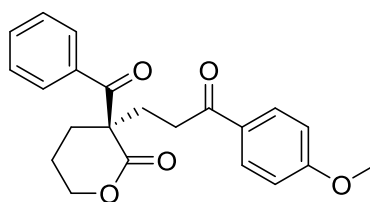

The title compound was purified by column chromatography on silica gel (PE : EA = 8:1 to 3:1), 35.8 mg, 98% yield, colorless oil,  $[\alpha]_D^{23} = +51.0$  (c 1.0,  $\text{CHCl}_3$ );  $^1\text{H NMR}$  (600 MHz,  $\text{CDCl}_3$ )  $\delta$  7.97 – 7.95 (m, 2 H), 7.92 – 7.90 (m, 2 H), 7.58 – 7.55 (m, 1 H), 7.47 – 7.44 (m, 2 H), 6.91 – 6.88 (m, 2 H), 4.46 – 4.42 (m, 1 H), 4.24 – 4.19 (m, 1 H), 3.85 (s, 3 H), 3.13 – 3.07 (m, 1 H), 3.00 – 2.95 (m, 1 H), 2.76 – 2.71 (m, 1 H), 2.60 – 2.55 (m, 2 H), 2.16 – 2.09 (m, 1 H), 2.02 - 1.96 (m, 1 H), 1.84 – 1.80 (m, 1 H).  $^{13}\text{C NMR}$  (150 MHz,  $\text{CDCl}_3$ )  $\delta$  197.5, 196.3, 172.5, 163.5, 134.9, 133.4, 130.3, 129.7, 129.0, 128.8, 113.7, 68.1, 57.5, 55.4, 33.4, 30.9, 28.8, 19.8. HRMS (ESI-Orbitrap)  $m/z$ :  $[\text{M}+\text{H}]^+$  Calcd for  $\text{C}_{22}\text{H}_{23}\text{O}_5$  367.1540, found 367.1548.

The ee was determined by HPLC analysis. CHIRALPAK AS-H; Hexane/2-propanol = 70/30; flow rate 1.0 mL/min; 255.8 nm; retention time: 18.2 min (minor) and 30.2 min (major)

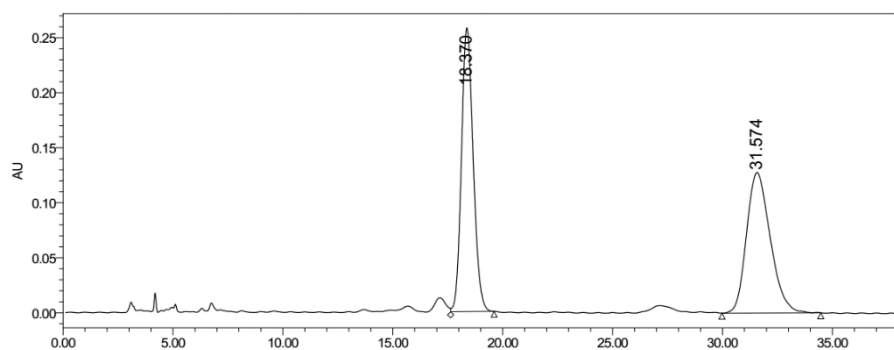

| Name | Retention time (min) | Area ( $\mu\text{V}\cdot\text{s}$ ) | Height ( $\mu\text{V}$ ) | % Area |
|------|----------------------|-------------------------------------|--------------------------|--------|
| 1    | 18.370               | 9566778                             | 257976                   | 49.94  |
| 2    | 31.574               | 9589112                             | 127811                   | 50.06  |

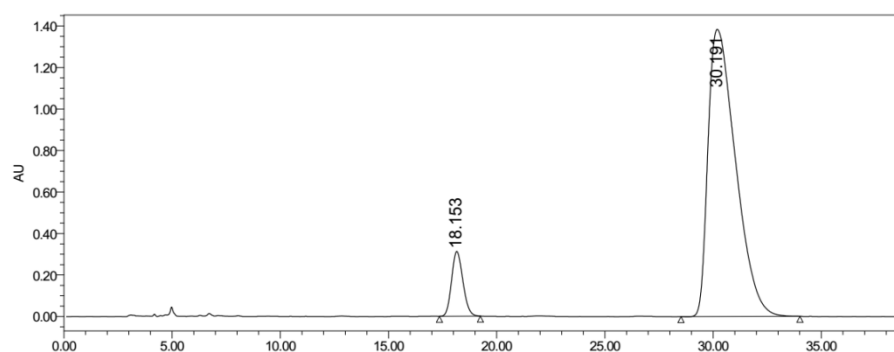

| Name | Retention time (min) | Area ( $\mu\text{V}\cdot\text{s}$ ) | Height ( $\mu\text{V}$ ) | % Area |
|------|----------------------|-------------------------------------|--------------------------|--------|
| 1    | 18.153               | 11347811                            | 311915                   | 8.49   |
| 2    | 30.191               | 122330038                           | 1383601                  | 91.51  |



**(S)-3-Benzoyl-3-(3-(3-methoxyphenyl)-3-oxopropyl)tetrahydro-2H-pyran-2-one (3k)**

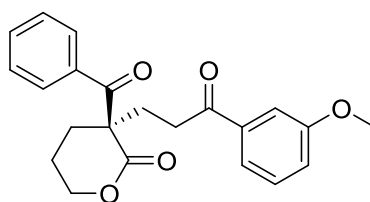

The title compound was purified by column chromatography on silica gel (PE : EA = 8:1 to 3:1), 35.5 mg, 97% yield, colorless oil,  $[\alpha]_D^{23} = +32.0$  (c 1.0,  $\text{CHCl}_3$ );  $^1\text{H NMR}$  (600 MHz,  $\text{CDCl}_3$ )  $\delta$  7.97 – 7.95 (m, 2 H), 7.57 (t,  $J = 7.2$  Hz, 1 H), 7.50 (d,  $J = 7.8$  Hz, 1 H), 7.47 – 7.44 (m, 3 H), 7.33 (t,  $J = 7.8$  Hz, 1 H), 7.09 – 7.07 (m, 1 H), 4.46 – 4.43 (m, 1 H), 4.24 – 4.20 (m, 1 H), 3.83 (s, 3 H), 3.17 – 3.11 (m, 1 H), 3.05 – 2.99 (m, 1 H), 2.76 – 2.72 (m, 1 H), 2.61 – 2.55 (m, 2 H), 2.17 – 2.09 (m, 1 H), 2.02 – 1.96 (m, 1 H), 1.84 – 1.79 (m, 1 H).  $^{13}\text{C NMR}$  (150 MHz,  $\text{CDCl}_3$ )  $\delta$  198.8, 196.2, 172.5, 159.8, 138.0, 134.8, 133.4, 129.5, 129.0, 128.8, 120.7, 119.7, 112.2, 68.1, 57.4, 55.4, 33.9, 30.8, 28.8, 19.8. HRMS (ESI-Orbitrap)  $m/z$ :  $[\text{M}+\text{H}]^+$  Calcd for  $\text{C}_{22}\text{H}_{23}\text{O}_5$  367.1540, found 367.1544.

The ee was determined by HPLC analysis. CHIRALPAK OD-H; Hexane/2-propanol = 70/30; flow rate 1.0 mL/min; 303.2 nm; retention time: 11.2 min (minor) and 14.3 min (major)

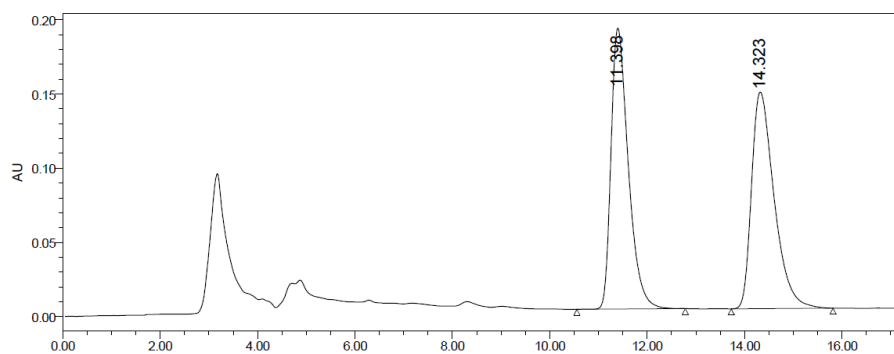

| Name | Retention time (min) | Area ( $\mu\text{V}\cdot\text{s}$ ) | Height ( $\mu\text{V}$ ) | % Area |
|------|----------------------|-------------------------------------|--------------------------|--------|
| 1    | 11.398               | 4661314                             | 189169                   | 49.79  |
| 2    | 14.323               | 4700570                             | 145995                   | 50.21  |

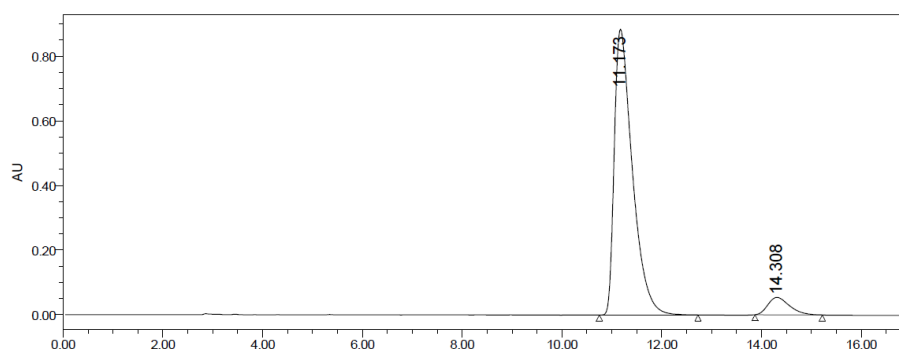

| Name | Retention time (min) | Area ( $\mu\text{V}\cdot\text{s}$ ) | Height ( $\mu\text{V}$ ) | % Area |
|------|----------------------|-------------------------------------|--------------------------|--------|
| 1    | 11.173               | 22312873                            | 884577                   | 93.20  |
| 2    | 14.308               | 1629096                             | 53861                    | 6.80   |

**(S)-3-Benzoyl-3-(3-oxo-3-(o-tolyl)propyl)tetrahydro-2H-pyran-2-one (3l)**

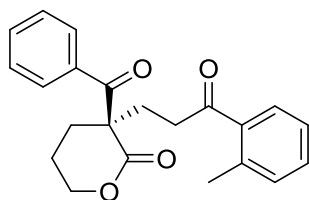

The title compound was purified by column chromatography on silica gel (PE : EA = 8:1 to 3:1), 34.7 mg, 99% yield, colorless oil,  $[\alpha]_D^{23} = +36.0$  (c 1.0,  $\text{CHCl}_3$ );  $^1\text{H NMR}$  (600 MHz,  $\text{CDCl}_3$ )  $\delta$  7.95 – 7.94 (m, 2 H), 7.61 – 7.60 (m, 1 H), 7.57 – 7.55 (m, 1 H), 7.46 – 7.44 (m, 2 H), 7.35 – 7.32 (m, 1 H), 7.22 – 7.19 (m, 2 H), 4.47 – 4.44 (m, 1 H), 4.24 – 4.20 (m, 1 H), 3.09 – 3.04 (m, 1 H), 3.00 – 2.94 (m, 1 H), 2.75 – 2.70 (m, 1 H), 2.62 – 2.53 (m, 2 H), 2.46 (s, 3 H), 2.18 – 2.10 (m, 1 H), 2.02 – 1.96 (m, 1 H), 1.83 – 1.78 (m, 1 H).  $^{13}\text{C NMR}$  (150 MHz,  $\text{CDCl}_3$ )  $\delta$  202.8, 196.2, 172.5, 138.0, 137.5, 134.8, 133.4, 131.8, 131.3, 129.0, 128.8, 128.5, 125.6, 68.1, 57.3, 36.5, 30.7, 28.9, 21.2, 19.8. HRMS (ESI-Orbitrap)  $m/z$ :  $[\text{M}+\text{H}]^+$  Calcd for  $\text{C}_{22}\text{H}_{23}\text{O}_4$  351.1591, found 351.1598.

The ee was determined by HPLC analysis. CHIRALPAK OD-H; Hexane/2-propanol = 70/30; flow rate 1.0 mL/min; 243.9 nm; retention time: 9.2 min (minor) and 12.8 min (major)

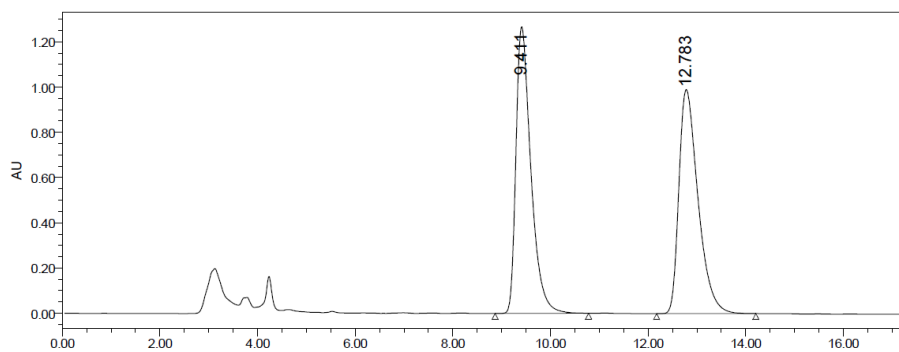

| Name | Retention time (min) | Area ( $\mu\text{V}\cdot\text{s}$ ) | Height ( $\mu\text{V}$ ) | % Area |
|------|----------------------|-------------------------------------|--------------------------|--------|
| 1    | 9.411                | 26896488                            | 1266005                  | 49.97  |
| 2    | 12.783               | 26930010                            | 989852                   | 50.03  |

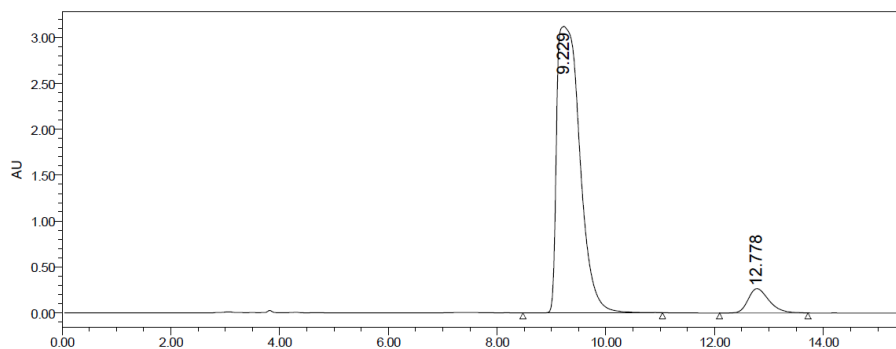

| Name | Retention time (min) | Area ( $\mu\text{V}\cdot\text{s}$ ) | Height ( $\mu\text{V}$ ) | % Area |
|------|----------------------|-------------------------------------|--------------------------|--------|
| 1    | 9.229                | 91947222                            | 3120816                  | 92.93  |
| 2    | 12.778               | 6994347                             | 264142                   | 7.07   |

**(S)-3-benzoyl-3-(3-(3,5-dimethylphenyl)-3-oxopropyl)tetrahydro-2H-pyran-2-one (3m)**

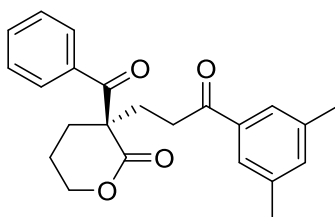

The title compound was purified by column chromatography on silica gel (PE : EA = 8:1 to 3:1), 36.0 mg, 99% yield, colorless oil,  $[\alpha]_D^{23} = +45.0$  (c 1.0,  $\text{CHCl}_3$ );  $^1\text{H NMR}$  (600 MHz,  $\text{CDCl}_3$ )  $\delta$  7.98 – 7.96 (m, 2 H), 7.58 – 7.55 (m, 1 H), 7.52 (s, 2 H), 7.46 (t,  $J = 7.8$  Hz, 2 H), 7.16 (s, 1 H), 4.46 – 4.43 (m, 1 H), 4.24 – 4.20 (m, 1 H), 3.15 – 3.09 (m, 1 H), 3.03 – 2.98 (m, 1 H), 2.77 – 2.72 (m, 1 H), 2.58 (t,  $J = 7.2$  Hz, 2 H), 2.33 (s, 6 H), 2.17 – 2.09 (m, 1 H), 2.02 – 1.96 (m, 1 H), 1.84 – 1.79 (m, 1 H).  $^{13}\text{C NMR}$  (150 MHz,  $\text{CDCl}_3$ )  $\delta$  199.4, 196.3, 172.5, 138.1, 136.7, 134.8, 134.7, 133.4, 129.0, 128.8, 125.8, 68.1, 57.4, 33.9, 30.7, 28.8, 21.2, 19.8. HRMS (ESI-Orbitrap)  $m/z$ :  $[\text{M}+\text{H}]^+$  Calcd for  $\text{C}_{23}\text{H}_{25}\text{O}_4$  365.1747, found 365.1747.

The ee was determined by HPLC analysis. CHIRALPAK OD-H; Hexane/2-propanol = 80/20; flow rate 1.0 mL/min; 229.9 nm; retention time: 9.9 min (minor) and 11.2 min (major)

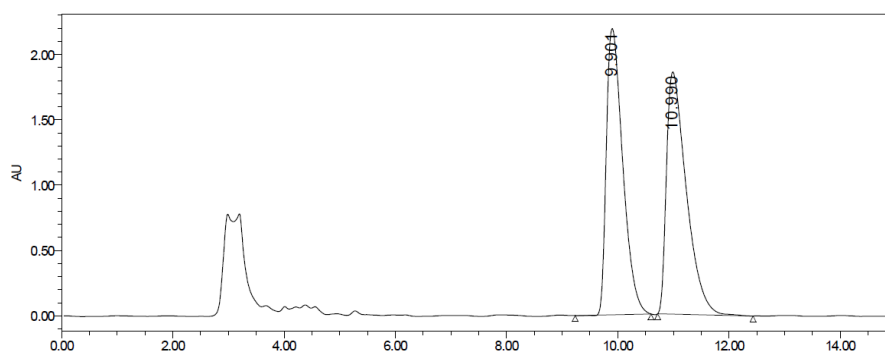

| Name | Retention time (min) | Area ( $\mu\text{V}\cdot\text{s}$ ) | Height ( $\mu\text{V}$ ) | % Area |
|------|----------------------|-------------------------------------|--------------------------|--------|
| 1    | 9.901                | 44847026                            | 2191159                  | 49.42  |
| 2    | 10.990               | 45906495                            | 1853295                  | 50.58  |

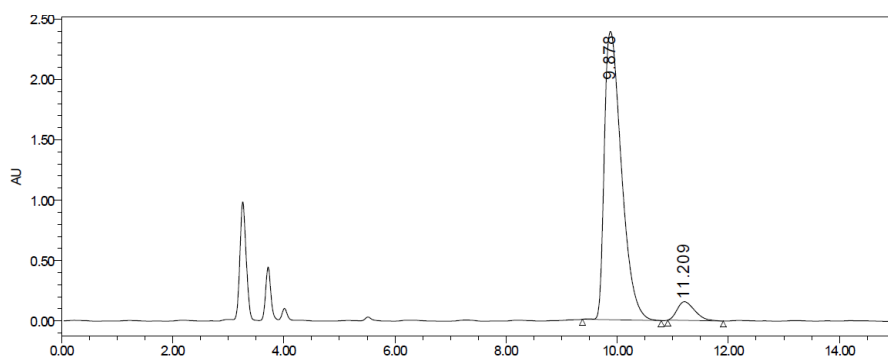

| Name | Retention time (min) | Area ( $\mu\text{V}\cdot\text{s}$ ) | Height ( $\mu\text{V}$ ) | % Area |
|------|----------------------|-------------------------------------|--------------------------|--------|
| 1    | 9.878                | 51049574                            | 2388027                  | 93.80  |
| 2    | 11.209               | 3371544                             | 154049                   | 6.20   |

**(S)-3-Benzoyl-3-(3-(naphthalen-1-yl)-3-oxopropyl)tetrahydro-2H-pyran-2-one (3n)**

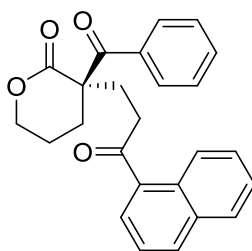

The title compound was purified by column chromatography on silica gel (PE : EA = 8:1 to 3:1), 34.7 mg, 90% yield, colorless oil,  $[\alpha]_D^{24} = +11.0$  (c 1.0,  $\text{CHCl}_3$ );  $^1\text{H NMR}$  (600 MHz,  $\text{CDCl}_3$ )  $\delta$  8.54 (d,  $J = 8.4$  Hz, 1 H), 7.97 – 7.94 (m, 3 H), 7.86 – 7.84 (m, 2 H), 7.58 – 7.43 (m, 6 H), 4.50 – 4.45 (m, 1 H), 4.27 – 4.20 (m, 1 H), 3.28 – 3.10 (m, 2 H), 2.79 – 2.61 (m, 3 H), 2.22 – 2.10 (m, 1 H), 2.04 – 1.95 (m, 1 H), 1.87 – 1.80 (m, 1 H).  $^{13}\text{C NMR}$  (150 MHz,  $\text{CDCl}_3$ )  $\delta$  203.1, 201.4, 196.4, 172.7, 135.7, 134.9, 134.0, 133.5, 132.8, 130.2, 129.1, 128.9, 128.5, 128.0, 127.8, 126.5, 125.8, 124.5, 68.3, 57.4, 37.3, 31.0, 29.1, 19.9. HRMS (ESI-Orbitrap)  $m/z$ :  $[\text{M}+\text{H}]^+$  Calcd for  $\text{C}_{25}\text{H}_{23}\text{O}_4$  387.1589, found 387.1591.

The ee was determined by HPLC analysis. CHIRALPAK AD-H; Hexane/2-propanol = 70/30; flow rate 1.0 mL/min; 240.4 nm; retention time: 12.9 min (minor) and 15.4 min (major)

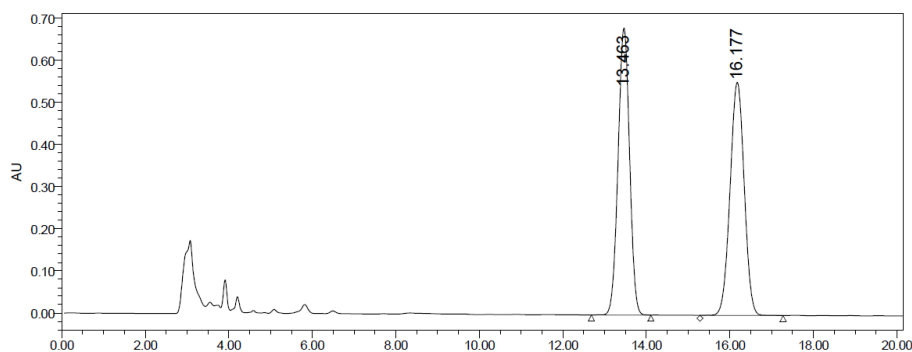

|   | Name | Retention time<br>(min) | Area<br>( $\mu\text{V}\cdot\text{s}$ ) | Height<br>( $\mu\text{V}$ ) | % Area |
|---|------|-------------------------|----------------------------------------|-----------------------------|--------|
| 1 |      | 13.463                  | 13025252                               | 681041                      | 49.97  |
| 2 |      | 16.177                  | 13038701                               | 553358                      | 50.03  |

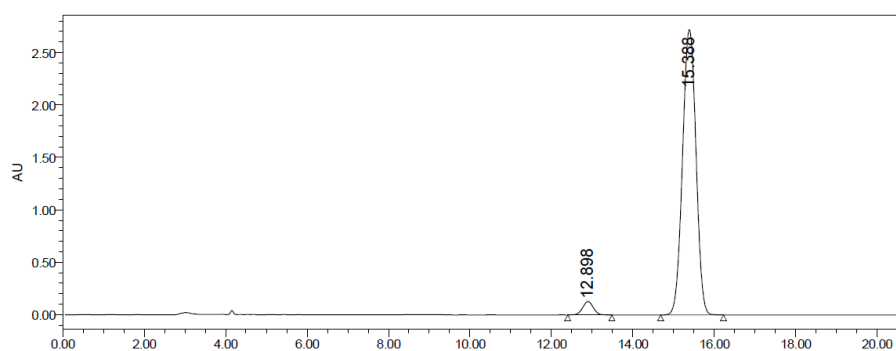

|   | Name | Retention time<br>(min) | Area<br>( $\mu\text{V}\cdot\text{s}$ ) | Height<br>( $\mu\text{V}$ ) | % Area |
|---|------|-------------------------|----------------------------------------|-----------------------------|--------|
| 1 |      | 12.898                  | 2286473                                | 126735                      | 3.54   |
| 2 |      | 15.388                  | 62329088                               | 2718234                     | 96.46  |

**(S)-3-(4-Fluorobenzoyl)-3-(3-(naphthalen-1-yl)-3-oxopropyl)tetrahydro-2H-pyran-2-one (3o)**

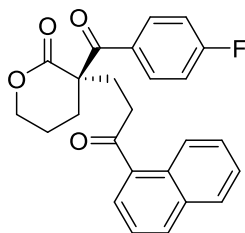

The title compound was purified by column chromatography on silica gel (PE : EA = 8:1 to 3:1), 36.8 mg, 91% yield, colorless oil,  $[\alpha]_D^{23} = +15.0$  (c 1.0,  $\text{CHCl}_3$ );  $^1\text{H NMR}$  (600 MHz,  $\text{CDCl}_3$ )  $\delta$  8.53 (d,  $J = 9.0$  Hz, 1 H), 8.04 – 8.01 (m, 2 H), 7.96 (d,  $J = 8.4$  Hz, 1 H), 7.86 – 7.84 (m, 2 H), 7.58 – 7.55 (m, 1 H), 7.53 – 7.50 (m, 1 H), 7.46 (t,  $J = 7.8$  Hz, 1 H), 7.14 – 7.11 (m, 2 H), 4.49 – 4.45 (m, 1 H), 4.21 – 4.17 (m, 1 H), 3.25 – 3.19 (m, 1 H), 3.13 – 3.08 (m, 1 H), 2.77 – 2.62 (m, 3 H), 2.20 – 2.12 (m, 1 H), 2.03 – 1.97 (m, 1 H), 1.85 – 1.80 (m, 1 H).  $^{13}\text{C NMR}$  (150 MHz,  $\text{CDCl}_3$ )  $\delta$  202.8, 194.5, 172.6, 166.6, 164.9, 135.5, 133.9, 132.7, 131.9, 131.8, 130.0, 128.4, 127.9, 127.7, 126.4, 125.7, 124.3, 116.1, 115.9, 68.0, 57.3, 37.0, 30.9, 28.7, 19.8. HRMS (ESI-Orbitrap)  $m/z$ :  $[\text{M}+\text{H}]^+$  Calcd for  $\text{C}_{25}\text{H}_{22}\text{FO}_4$  405.1495, found 405.1497.

The ee was determined by HPLC analysis. CHIRALPAK AD-H; Hexane/2-propanol = 70/30; flow rate 1.0 mL/min; 240.4 nm; retention time: 13.6 min (minor) and 16.5 min (major)

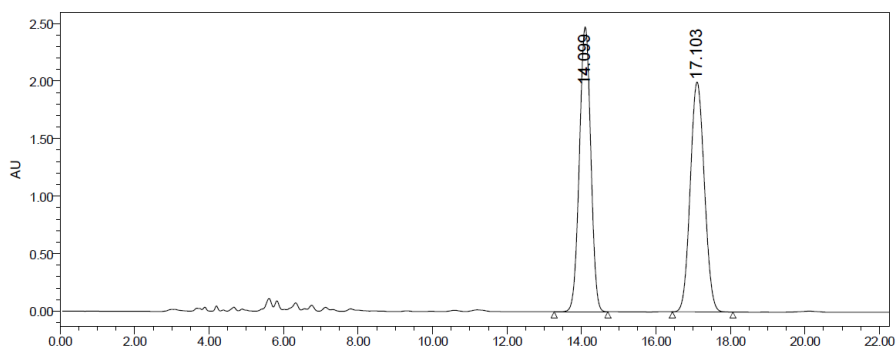

| Name | Retention time (min) | Area ( $\mu\text{V}\cdot\text{s}$ ) | Height ( $\mu\text{V}$ ) | % Area |
|------|----------------------|-------------------------------------|--------------------------|--------|
| 1    | 14.099               | 52470741                            | 2473856                  | 49.93  |
| 2    | 17.103               | 52621162                            | 1997693                  | 50.07  |

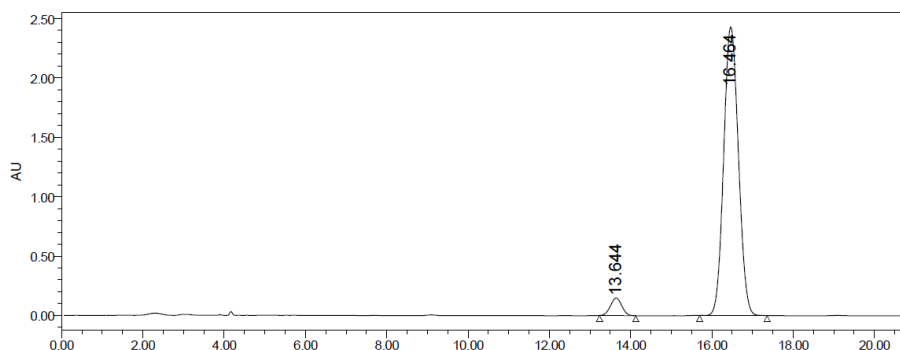

| Name | Retention time (min) | Area ( $\mu\text{V}\cdot\text{s}$ ) | Height ( $\mu\text{V}$ ) | % Area |
|------|----------------------|-------------------------------------|--------------------------|--------|
| 1    | 13.644               | 2867745                             | 147902                   | 4.48   |
| 2    | 16.464               | 61191078                            | 2428204                  | 95.52  |

**(S)-3-(4-Bromobenzoyl)-3-(3-(naphthalen-1-yl)-3-oxopropyl)tetrahydro-2H-pyran-2-one (3p)**

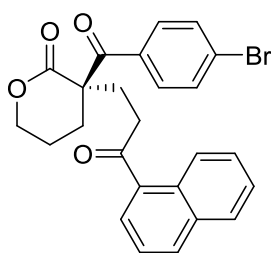

The title compound was purified by column chromatography on silica gel (PE : EA = 8:1 to 3:1), 44.5 mg, 96% yield, white solid, mp 112.4 – 113.7 °C,  $[\alpha]_D^{23} = +36.0$  (c 1.0, CHCl<sub>3</sub>); <sup>1</sup>H NMR (600 MHz, CDCl<sub>3</sub>) δ 8.43 (d, *J* = 8.4 Hz, 1 H), 7.85 (d, *J* = 8.4 Hz, 1 H), 7.75 – 7.71 (m, 3 H), 7.49 – 7.44 (m, 2 H), 7.42 – 7.39 (m, 1 H), 7.34 (t, *J* = 7.2 Hz, 1 H), 4.37 – 4.34 (m, 1 H), 4.11 – 4.07 (m, 1 H), 3.14 – 3.09 (m, 1 H), 3.04 – 2.99 (m, 1 H), 2.60 – 2.50 (m, 3 H), 2.06 – 1.98 (m, 1 H), 1.89 – 1.83 (m, 1 H), 1.73 – 1.68 (m, 1 H). <sup>13</sup>C NMR (150 MHz, CDCl<sub>3</sub>) δ 202.7, 195.2, 172.2, 135.4, 133.8, 133.4, 132.6, 132.0, 130.4, 129.9, 128.6, 128.3, 127.8, 127.6, 126.3, 125.6, 124.3, 68.2, 57.2, 37.0, 30.7, 28.7, 19.7. HRMS (ESI-Orbitrap) *m/z*: [M+H]<sup>+</sup> Calcd for C<sub>25</sub>H<sub>22</sub>BrO<sub>4</sub> 465.0695, found 465.0696.

The ee was determined by HPLC analysis. CHIRALPAK AD-H; Hexane/2-propanol = 70/30; flow rate 1.0 mL/min; 213.3 nm; retention time: 15.5 min (minor) and 19.4 min (major)

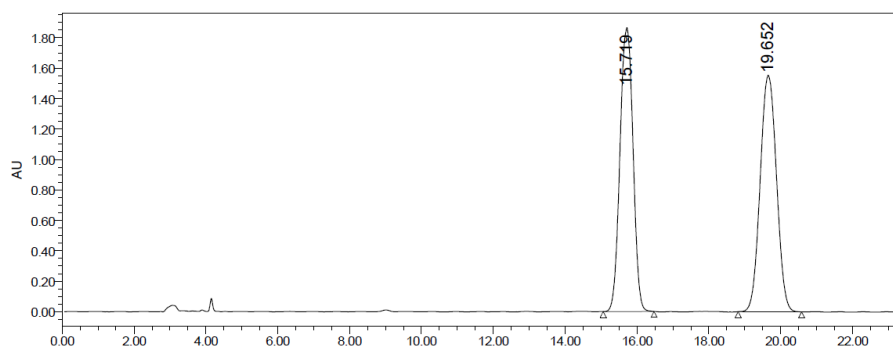

|   | Name | Retention time (min) | Area (μV*s) | Height (μV) | % Area |
|---|------|----------------------|-------------|-------------|--------|
| 1 |      | 15.719               | 47062714    | 1863653     | 48.94  |
| 2 |      | 19.652               | 49093298    | 1553437     | 51.06  |

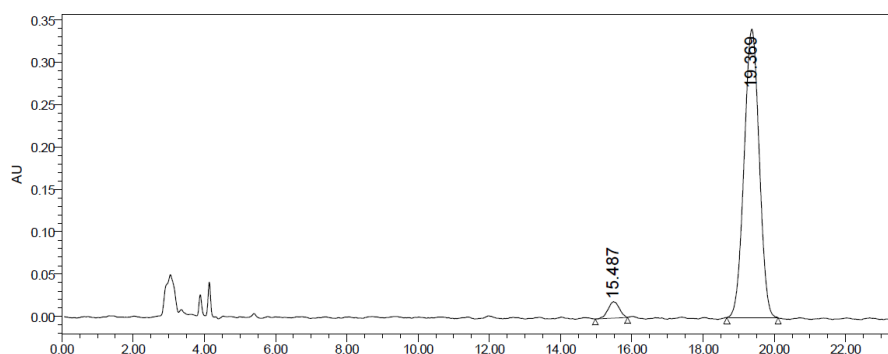

|   | Name | Retention time (min) | Area (μV*s) | Height (μV) | % Area |
|---|------|----------------------|-------------|-------------|--------|
| 1 |      | 15.487               | 425228      | 19256       | 4.08   |
| 2 |      | 19.369               | 10007907    | 340149      | 95.92  |

**(S)-3-(4-Chlorobenzoyl)-3-(3-(naphthalen-1-yl)-3-oxopropyl)tetrahydro-2H-pyran-2-one (3q)**

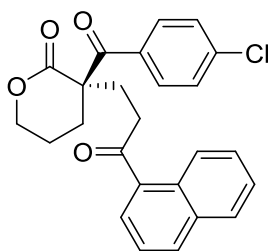

The title compound was purified by column chromatography on silica gel (PE : EA = 8:1 to 3:1), 41.6 mg, 99% yield, colorless oil,  $[\alpha]_D^{23} = +1.0$  (c 1.0,  $\text{CHCl}_3$ );  $^1\text{H NMR}$  (600 MHz,  $\text{CDCl}_3$ )  $\delta$  8.52 (d,  $J = 8.4$  Hz, 1 H), 7.94 (d,  $J = 8.4$  Hz, 1 H), 7.91 – 7.89 (m, 2 H), 7.84 (d,  $J = 7.2$  Hz, 2 H), 7.57 – 7.54 (m, 1 H), 7.52 – 7.49 (m, 1 H), 7.45 – 7.40 (m, 3 H), 4.48 – 4.44 (m, 1 H), 4.21 – 4.17 (m, 1 H), 3.24 – 3.18 (m, 1 H), 3.13 – 3.08 (m, 1 H), 2.71 – 2.60 (m, 3 H), 2.17 – 2.09 (m, 1 H), 2.03 – 1.94 (m, 1 H), 1.84 – 1.79 (m, 1 H).  $^{13}\text{C NMR}$  (150 MHz,  $\text{CDCl}_3$ )  $\delta$  202.8, 195.1, 172.3, 140.0, 135.5, 133.9, 133.1, 132.7, 130.5, 130.0, 129.1, 128.4, 127.9, 127.7, 126.4, 125.7, 124.3, 68.2, 57.3, 37.0, 30.8, 28.8, 19.8. HRMS (ESI-Orbitrap)  $m/z$ :  $[\text{M}+\text{H}]^+$  Calcd for  $\text{C}_{25}\text{H}_{22}\text{ClO}_4$  421.1201, found 421.1212.

The ee was determined by HPLC analysis. CHIRALPAK AD-H; Hexane/2-propanol = 70/30; flow rate 1.0 mL/min; 246.3 nm; retention time: 14.0 min (minor) and 17.1 min (major)

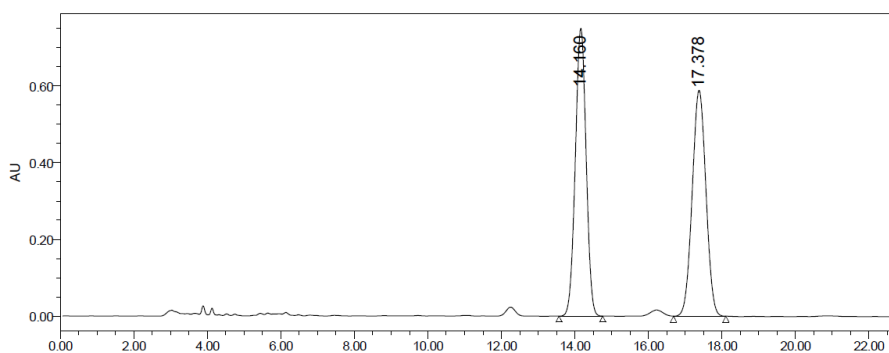

| Name | Retention time (min) | Area ( $\mu\text{V}\cdot\text{s}$ ) | Height ( $\mu\text{V}$ ) | % Area |
|------|----------------------|-------------------------------------|--------------------------|--------|
| 1    | 14.160               | 15337183                            | 749844                   | 50.08  |
| 2    | 17.378               | 15289365                            | 589051                   | 49.92  |

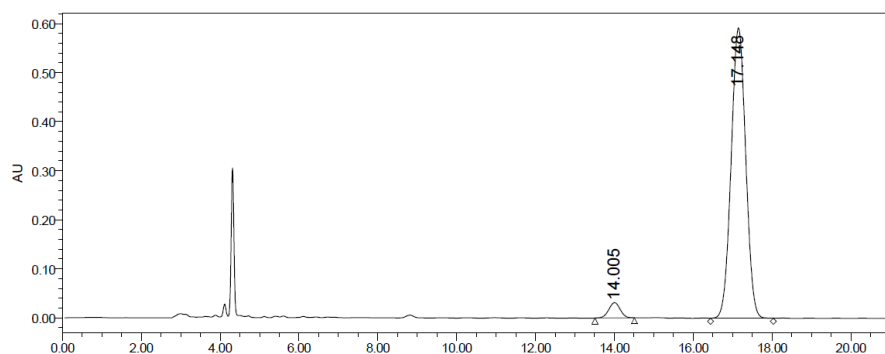

| Name | Retention time (min) | Area ( $\mu\text{V}\cdot\text{s}$ ) | Height ( $\mu\text{V}$ ) | % Area |
|------|----------------------|-------------------------------------|--------------------------|--------|
| 1    | 14.005               | 628311                              | 31157                    | 3.98   |
| 2    | 17.148               | 15175182                            | 591772                   | 96.02  |

**(S)-3-(3-Chlorobenzoyl)-3-(3-(naphthalen-1-yl)-3-oxopropyl)tetrahydro-2H-pyran-2-one (3r)**

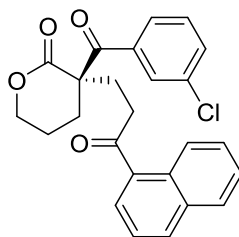

The title compound was purified by column chromatography on silica gel (PE : EA = 8:1 to 3:1), 41.6 mg, 99% yield, colorless oil,  $[\alpha]_D^{23} = +15.0$  (c 1.0,  $\text{CHCl}_3$ );  $^1\text{H NMR}$  (600 MHz,  $\text{CDCl}_3$ )  $\delta$  8.54 (d,  $J = 8.4$  Hz, 1 H), 7.96 (d,  $J = 8.4$  Hz, 1 H), 7.92 (t,  $J = 2.4$  Hz, 1 H), 7.87 – 7.81 (m, 3 H), 7.58 – 7.56 (m, 1 H), 7.54 – 7.50 (m, 2 H), 7.47 (t,  $J = 7.8$  Hz, 1 H), 7.39 (t,  $J = 7.8$  Hz, 1 H), 4.53 – 4.50 (m, 1 H), 4.28 – 4.24 (m, 1 H), 3.26 – 3.21 (m, 1 H), 3.16 – 3.10 (m, 1 H), 2.72 – 2.62 (m, 3 H), 2.22 – 2.14 (m, 1 H), 2.04 – 1.98 (m, 1 H), 1.88 – 1.84 (m, 1 H).  $^{13}\text{C NMR}$  (150 MHz,  $\text{CDCl}_3$ )  $\delta$  202.8, 195.2, 172.0, 136.3, 135.5, 135.2, 133.9, 133.3, 132.7, 130.0, 129.2, 128.4, 127.9, 127.7, 126.8, 126.4, 125.7, 124.4, 68.4, 57.3, 37.1, 30.8, 29.0, 19.8. HRMS (ESI-Orbitrap)  $m/z$ :  $[\text{M}+\text{H}]^+$  Calcd for  $\text{C}_{25}\text{H}_{22}\text{ClO}_4$  421.1201, found 421.1211.

The ee was determined by HPLC analysis. CHIRALPAK AD-H; Hexane/2-propanol = 70/30; flow rate 1.0 mL/min; 298.5 nm; retention time: 12.4 min (minor) and 14.9 min (major)

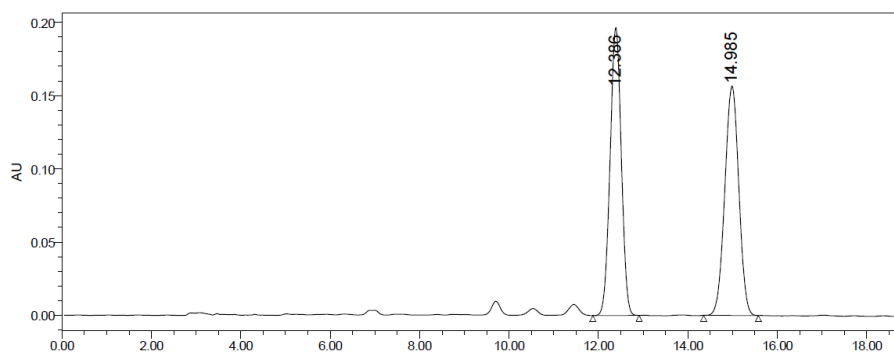

| Name | Retention time (min) | Area ( $\mu\text{V}\cdot\text{s}$ ) | Height ( $\mu\text{V}$ ) | % Area |
|------|----------------------|-------------------------------------|--------------------------|--------|
| 1    | 12.386               | 3418881                             | 196414                   | 50.04  |
| 2    | 14.985               | 3413850                             | 156474                   | 49.96  |

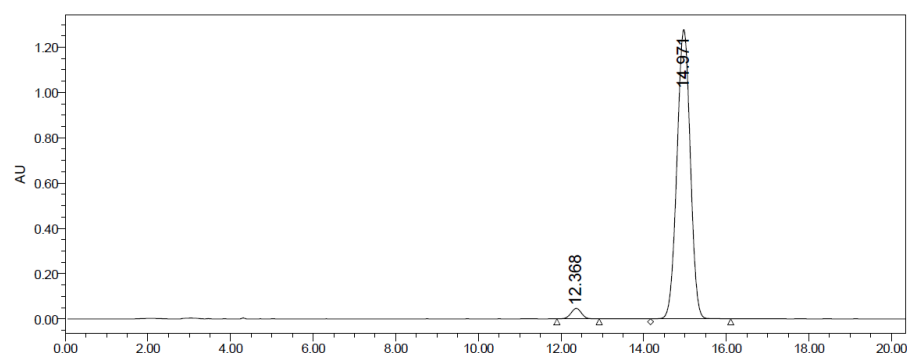

| Name | Retention time (min) | Area ( $\mu\text{V}\cdot\text{s}$ ) | Height ( $\mu\text{V}$ ) | % Area |
|------|----------------------|-------------------------------------|--------------------------|--------|
| 1    | 12.368               | 801979                              | 45712                    | 2.73   |
| 2    | 14.971               | 28618881                            | 1276703                  | 97.27  |



**(S)-3-(2-Chlorobenzoyl)-3-(3-(naphthalen-1-yl)-3-oxopropyl)tetrahydro-2H-pyran-2-one (3s)**

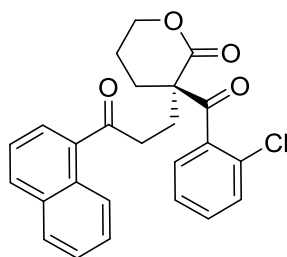

The title compound was purified by column chromatography on silica gel (PE : EA = 8:1 to 3:1), 41.6 mg, 99% yield, colorless oil,  $[\alpha]_D^{23} = +65.0$  (c 1.0,  $\text{CHCl}_3$ );  $^1\text{H NMR}$  (600 MHz,  $\text{CDCl}_3$ )  $\delta$  8.55 (d,  $J = 8.4$  Hz, 1 H), 7.98 (d,  $J = 8.4$  Hz, 1 H), 7.89 – 7.86 (m, 2 H), 7.59 – 7.56 (m, 1 H), 7.54 – 7.48 (m, 2 H), 7.42 – 7.40 (m, 2 H), 7.38 – 7.35 (m, 1 H), 7.31 – 7.29 (m, 1 H), 4.46 – 4.36 (m, 2 H), 3.22 – 3.19 (m, 2 H), 2.67 – 2.54 (m, 3 H), 2.06 – 1.96 (m, 3 H).  $^{13}\text{C NMR}$  (150 MHz,  $\text{CDCl}_3$ )  $\delta$  202.6, 200.4, 170.3, 138.0, 135.4, 133.9, 132.8, 131.2, 130.4, 130.3, 130.1, 128.4, 128.0, 127.7, 127.6, 126.7, 126.4, 125.7, 124.4, 69.9, 60.3, 37.1, 31.0, 28.1, 20.5. HRMS (ESI-Orbitrap)  $m/z$ :  $[\text{M}+\text{H}]^+$  Calcd for  $\text{C}_{25}\text{H}_{22}\text{ClO}_4$  421.1201, found 421.1211.

The ee was determined by HPLC analysis. CHIRALPAK AD-H; Hexane/2-propanol = 70/30; flow rate 1.0 mL/min; 300.9 nm; retention time: 14.1 min (minor) and 16.3 min (major)

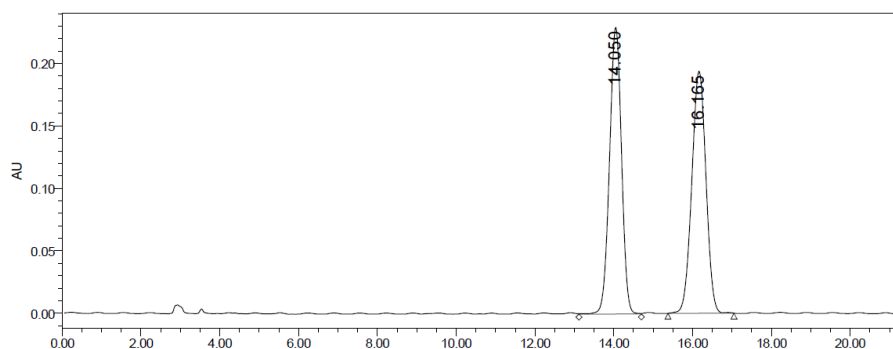

| Name | Retention time (min) | Area ( $\mu\text{V}\cdot\text{s}$ ) | Height ( $\mu\text{V}$ ) | % Area |
|------|----------------------|-------------------------------------|--------------------------|--------|
| 1    | 14.050               | 4843728                             | 229582                   | 49.98  |
| 2    | 16.165               | 4847617                             | 193800                   | 50.02  |

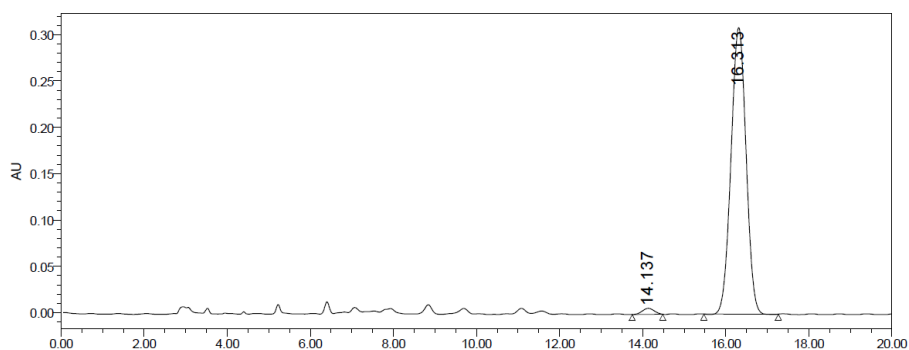

| Name | Retention time (min) | Area ( $\mu\text{V}\cdot\text{s}$ ) | Height ( $\mu\text{V}$ ) | % Area |
|------|----------------------|-------------------------------------|--------------------------|--------|
| 1    | 14.137               | 129845                              | 6565                     | 1.64   |
| 2    | 16.313               | 7783829                             | 309091                   | 98.36  |

**(S)-4-(3-(3-(Naphthalen-1-yl)-3-oxopropyl)-2-oxotetrahydro-2H-pyran-3-carbonyl)benzoni-  
trile (3t)**

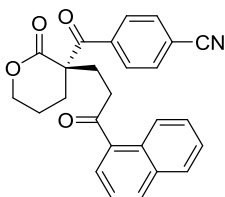

The title compound was purified by column chromatography on silica gel (PE : EA = 8:1 to 3:1), 38.6 mg, 94% yield, colorless oil,  $[\alpha]_D^{23} = +25.0$  (c 1.0,  $\text{CHCl}_3$ );  $^1\text{H NMR}$  (600 MHz,  $\text{CDCl}_3$ )  $\delta$  8.52 (d,  $J = 9.0$  Hz, 1 H), 7.99 (d,  $J = 8.4$  Hz, 2 H), 7.97 (d,  $J = 8.4$  Hz, 1 H), 7.86 – 7.85 (m, 2 H), 7.74 (d,  $J = 8.4$  Hz, 2 H), 7.58 – 7.56 (m, 1 H), 7.53 – 7.51 (m, 1 H), 7.48 – 7.45 (d,  $J = 7.8$  Hz, 1 H), 4.57 – 4.53 (m, 1 H), 4.32 – 4.26 (m, 1 H), 3.26 – 3.21 (m, 1 H), 3.15 – 3.10 (m, 1 H), 2.72 – 2.63 (m, 3 H), 2.24 – 2.16 (m, 1 H), 2.05 – 1.99 (m, 1 H), 1.92 – 1.87 (m, 1 H).  $^{13}\text{C NMR}$  (100 MHz,)  $\delta$  202.7, 195.6, 171.8, 138.3, 135.5, 134.0, 132.9, 132.6, 130.1, 129.4, 128.5, 128.1, 127.8, 126.6, 125.7, 124.4, 117.7, 116.6, 68.8, 57.5, 37.1, 30.8, 29.1, 19.9. HRMS (ESI-Orbitrap)  $m/z$ :  $[\text{M}+\text{H}]^+$  Calcd for  $\text{C}_{26}\text{H}_{22}\text{NO}_4$  412.1540, found 412.1543.

The ee was determined by HPLC analysis. CHIRALPAK AD-H; Hexane/2-propanol = 65/35; flow rate 1.0 mL/min; 242.8 nm; retention time: 21.5 min (minor) and 30.9 min (major)

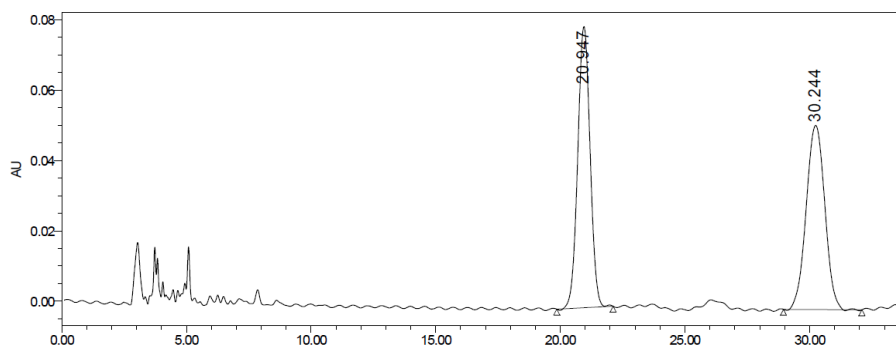

|   | Name | Retention time<br>(min) | Area<br>( $\mu\text{V}\cdot\text{s}$ ) | Height<br>( $\mu\text{V}$ ) | % Area |
|---|------|-------------------------|----------------------------------------|-----------------------------|--------|
| 1 |      | 20.947                  | 2761317                                | 79991                       | 50.28  |
| 2 |      | 30.244                  | 2730153                                | 52398                       | 49.72  |

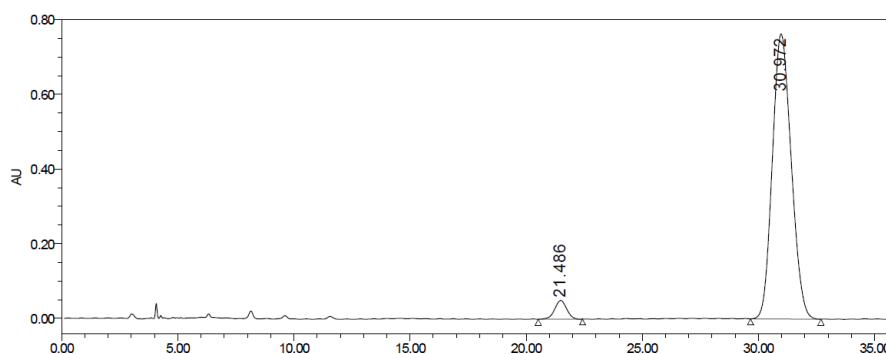

|   | Name | Retention time<br>(min) | Area<br>( $\mu\text{V}\cdot\text{s}$ ) | Height<br>( $\mu\text{V}$ ) | % Area |
|---|------|-------------------------|----------------------------------------|-----------------------------|--------|
| 1 |      | 21.486                  | 1785297                                | 49795                       | 3.98   |
| 2 |      | 30.972                  | 43104242                               | 763150                      | 96.02  |

**(S)-3-(3-(Naphthalen-1-yl)-3-oxopropyl)-3-(4-nitrobenzoyl)tetrahydro-2H-pyran-2-one (3u)**

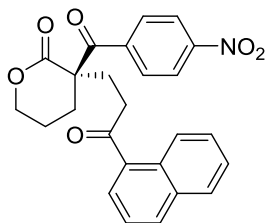

The title compound was purified by column chromatography on silica gel (PE : EA = 8:1 to 3:1), 42.2 mg, 98% yield, colorless oil,  $[\alpha]_D^{23} = +21.0$  (c 1.0,  $\text{CHCl}_3$ );  $^1\text{H NMR}$  (600 MHz,  $\text{CDCl}_3$ )  $\delta$  8.52 (d,  $J = 9.0$  Hz, 1 H), 8.27 (d,  $J = 9.0$  Hz, 2 H), 8.06 (d,  $J = 8.4$  Hz, 2 H), 7.97 (d,  $J = 7.8$  Hz, 1 H), 7.87 – 7.85 (m, 2 H), 7.58 – 7.55 (m, 1 H), 7.53 – 7.50 (m, 1 H), 7.46 (t,  $J = 7.8$  Hz, 1 H), 4.57 – 4.54 (m, 1 H), 4.32 – 4.28 (m, 1 H), 3.27 – 3.22 (m, 1 H), 3.17 – 3.11 (m, 1 H), 2.74 – 2.62 (m, 3 H), 2.24 – 2.16 (m, 1 H), 2.06 – 1.99 (m, 1 H), 1.94 – 1.89 (m, 1 H).  $^{13}\text{C NMR}$  (150 MHz,  $\text{CDCl}_3$ )  $\delta$  202.6, 195.5, 171.6, 150.1, 139.9, 135.4, 133.9, 132.8, 130.0, 129.9, 128.4, 127.9, 127.7, 126.4, 125.6, 124.3, 123.8, 68.7, 57.5, 37.0, 30.7, 29.0, 19.8. HRMS (ESI-Orbitrap)  $m/z$ :  $[\text{M}+\text{H}]^+$  Calcd for  $\text{C}_{25}\text{H}_{22}\text{NO}_6$  432.1439, found 432.1442.

The ee was determined by HPLC analysis. CHIRALPAK AD-H; Hexane/2-propanol = 65/35; flow rate 1.0 mL/min; 254.0 nm; retention time: 26.2 min (minor) and 31.7 min (major)

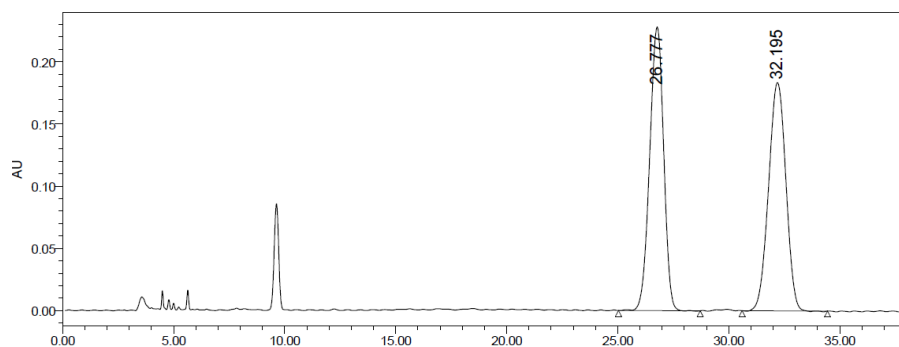

| Name | Retention time (min) | Area ( $\mu\text{V}\cdot\text{s}$ ) | Height ( $\mu\text{V}$ ) | % Area |
|------|----------------------|-------------------------------------|--------------------------|--------|
| 1    | 26.777               | 9983860                             | 228029                   | 50.09  |
| 2    | 32.195               | 9949350                             | 183507                   | 49.91  |

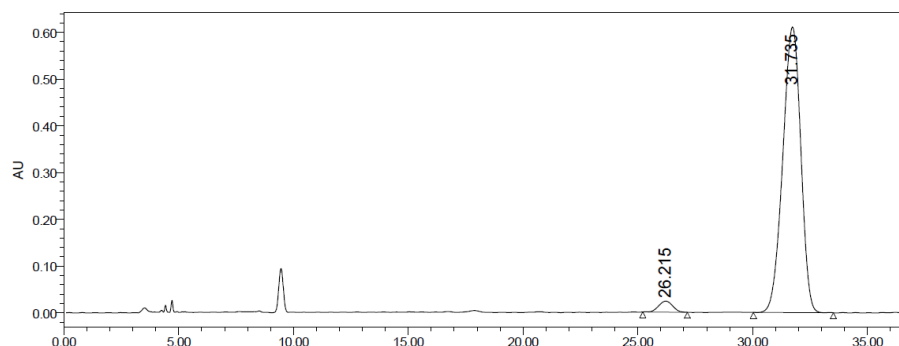

| Name | Retention time (min) | Area ( $\mu\text{V}\cdot\text{s}$ ) | Height ( $\mu\text{V}$ ) | % Area |
|------|----------------------|-------------------------------------|--------------------------|--------|
| 1    | 26.215               | 997419                              | 23514                    | 2.91   |
| 2    | 31.735               | 33295599                            | 610474                   | 97.09  |

**(S)-3-(1-Naphthoyl)-3-(3-(naphthalen-1-yl)-3-oxopropyl)tetrahydro-2H-pyran-2-one (3v)**

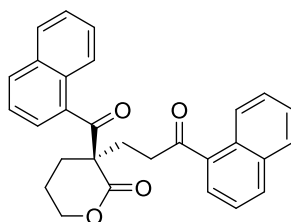

The title compound was purified by column chromatography on silica gel (PE : EA = 8:1 to 3:1), 43.2 mg, 99% yield, colorless oil,  $[\alpha]_D^{23} = +15.0$  (c 1.0,  $\text{CHCl}_3$ );  $^1\text{H NMR}$  (400 MHz,  $\text{CDCl}_3$ )  $\delta$  8.53 (d,  $J = 8.8$  Hz, 1 H), 8.07 (d,  $J = 8.4$  Hz, 1 H), 7.93 (d,  $J = 8.0$  Hz, 2 H), 7.86 – 7.79 (m, 2 H), 7.56 – 7.39 (m, 6 H), 4.37 – 4.31 (m, 1 H), 4.24 – 4.18 (m, 1 H), 3.27 – 3.22 (m, 2 H), 2.73 – 2.58 (m, 3 H), 2.04 – 1.89 (m, 3 H).  $^{13}\text{C NMR}$  (100 MHz,  $\text{CDCl}_3$ )  $\delta$  202.8, 201.0, 171.5, 135.4, 134.8, 133.8, 132.7, 132.0, 130.4, 130.0, 128.7, 128.3, 128.0, 127.8, 127.7, 126.5, 126.3, 125.6, 125.3, 124.7, 124.3, 124.1, 68.8, 60.2, 37.3, 31.4, 28.8, 20.2. HRMS (ESI-Orbitrap)  $m/z$ :  $[\text{M}+\text{H}]^+$  Calcd for  $\text{C}_{29}\text{H}_{25}\text{O}_4$  437.1747, found 437.1755.

The ee was determined by HPLC analysis. CHIRALPAK AD-H; Hexane/2-propanol = 70/30; flow rate 1.0 mL/min; 300.9 nm; retention time: 19.1 min (minor) and 21.8 min (major)

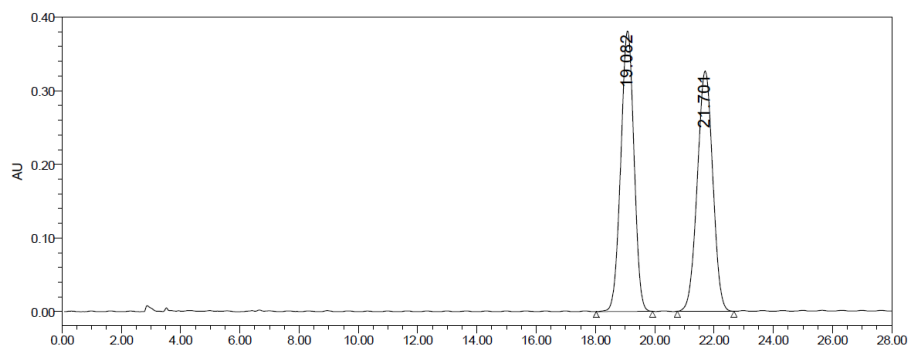

|   | Name | Retention time<br>(min) | Area<br>( $\mu\text{V}\cdot\text{s}$ ) | Height<br>( $\mu\text{V}$ ) | % Area |
|---|------|-------------------------|----------------------------------------|-----------------------------|--------|
| 1 |      | 19.082                  | 11771433                               | 380878                      | 49.88  |
| 2 |      | 21.701                  | 11827469                               | 326069                      | 50.12  |

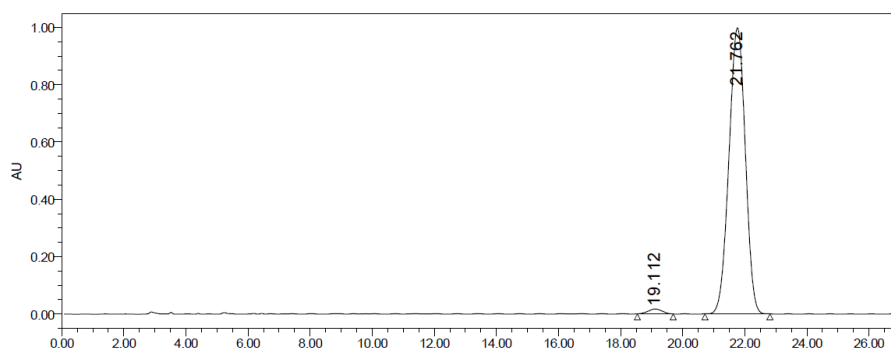

|   | Name | Retention time<br>(min) | Area<br>( $\mu\text{V}\cdot\text{s}$ ) | Height<br>( $\mu\text{V}$ ) | % Area |
|---|------|-------------------------|----------------------------------------|-----------------------------|--------|
| 1 |      | 19.112                  | 541898                                 | 17305                       | 1.46   |
| 2 |      | 21.762                  | 36548311                               | 997242                      | 98.54  |

**(S)-3-Benzoyl-3-(3-(4-methoxynaphthalen-1-yl)-3-oxopropyl)tetrahydro-2H-pyran-2-one**  
**(3w)**

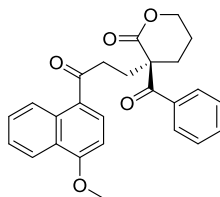

The title compound was purified by column chromatography on silica gel (PE : EA = 8:1 to 3:1), 41.2 mg, 99% yield, colorless oil,  $[\alpha]_D^{23} = +31.0$  (c 1.0,  $\text{CHCl}_3$ );  $^1\text{H NMR}$  (600 MHz,  $\text{CDCl}_3$ )  $\delta$  8.85 (d,  $J = 8.4$  Hz, 1 H), 8.9 (d,  $J = 8.4$  Hz, 1 H), 7.98 – 7.96 (m, 3 H), 7.60 – 7.55 (m, 2 H), 7.51 – 7.44 (m, 3 H), 6.75 (d,  $J = 8.4$  Hz, 1 H), 4.47 – 4.44 (m, 1 H), 4.24 – 4.20 (m, 1 H), 4.04 (s, 3 H), 3.23 – 3.18 (m, 1 H), 3.12 – 3.07 (m, 1 H), 2.78 – 2.73 (m, 1 H), 2.68 – 2.62 (m, 2 H), 2.17 – 2.10 (m, 1 H), 2.02 – 1.96 (m, 1 H), 1.87 – 1.82 (m, 1 H).  $^{13}\text{C NMR}$  (150 MHz,  $\text{CDCl}_3$ )  $\delta$  201.0, 196.4, 172.6, 159.0, 134.9, 133.3, 131.9, 130.9, 129.0, 128.8, 128.6, 127.1, 125.9, 125.7, 125.7, 122.0, 102.0, 68.1, 57.5, 55.8, 36.1, 31.4, 28.8, 19.9. HRMS (ESI-Orbitrap)  $m/z$ :  $[\text{M}+\text{H}]^+$  Calcd for  $\text{C}_{26}\text{H}_{25}\text{O}_5$  417.1697, found 417.1707.

The ee was determined by HPLC analysis. CHIRALPAK AD-H; Hexane/2-propanol = 70/30; flow rate 1.0 mL/min; 236.9 nm; retention time: 17.9 min (minor) and 22.2 min (major)

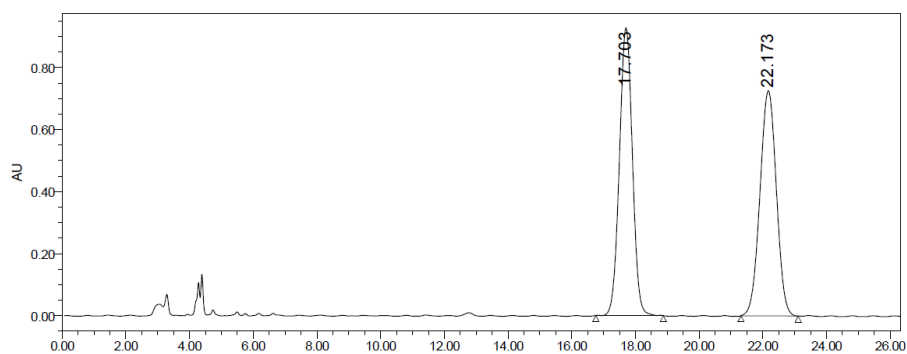

|   | Name | Retention time<br>(min) | Area<br>( $\mu\text{V}\cdot\text{s}$ ) | Height<br>( $\mu\text{V}$ ) | % Area |
|---|------|-------------------------|----------------------------------------|-----------------------------|--------|
| 1 |      | 17.703                  | 26258159                               | 927189                      | 50.30  |
| 2 |      | 22.173                  | 25944830                               | 725151                      | 49.70  |

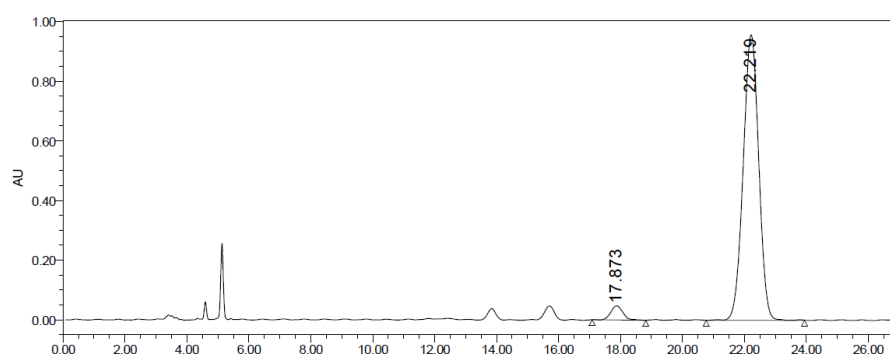

|   | Name | Retention time<br>(min) | Area<br>( $\mu\text{V}\cdot\text{s}$ ) | Height<br>( $\mu\text{V}$ ) | % Area |
|---|------|-------------------------|----------------------------------------|-----------------------------|--------|
| 1 |      | 17.873                  | 1290971                                | 47275                       | 3.73   |
| 2 |      | 22.219                  | 33278983                               | 956755                      | 96.27  |

**(S)-3-Benzoyl-3-(3-(naphthalen-2-yl)-3-oxopropyl)tetrahydro-2H-pyran-2-one (3x)**

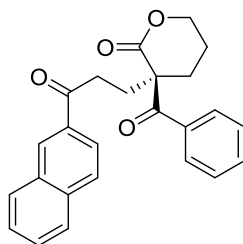

The title compound was purified by column chromatography on silica gel (PE : EA = 8:1 to 3:1), 35.5 mg, 92% yield, colorless oil,  $[\alpha]_D^{23} = +37.0$  (c 1.0,  $\text{CHCl}_3$ );  $^1\text{H NMR}$  (600 MHz,  $\text{CDCl}_3$ )  $\delta$  8.45 (s, 1 H), 8.00 – 7.98 (m, 3 H), 7.93 (d,  $J = 7.8$  Hz, 1 H), 7.86 – 7.84 (m, 2 H), 7.59 – 7.56 (m, 2 H), 7.54 – 7.52 (m, 1 H), 7.48 – 7.45 (m, 2 H), 4.49 – 4.45 (m, 1 H), 4.27 – 4.23 (m, 1 H), 3.33 – 3.28 (m, 1 H), 3.20 – 3.15 (m, 1 H), 2.79 – 2.74 (m, 1 H), 2.68 – 2.62 (m, 2 H), 2.19 – 2.12 (m, 1 H), 2.04 – 1.98 (m, 1 H), 1.88 – 1.84 (m, 1 H).  $^{13}\text{C NMR}$  (150 MHz,  $\text{CDCl}_3$ )  $\delta$  198.9, 196.3, 172.5, 135.6, 134.8, 133.9, 133.4, 132.5, 129.8, 129.6, 129.0, 128.8, 128.4 (d,  $J = 4.5$  Hz), 127.7, 126.7, 123.8, 68.2, 57.4, 33.9, 30.8, 28.9, 19.9. HRMS (ESI-Orbitrap)  $m/z$ :  $[\text{M}+\text{H}]^+$  Calcd for  $\text{C}_{25}\text{H}_{23}\text{O}_4$  387.1588, found 387.1591.

The ee was determined by HPLC analysis. CHIRALPAK AD-H; Hexane/2-propanol = 65/35; flow rate 1.0 mL/min; 281.8 nm; retention time: 14.1 min (minor) and 20.8 min (major)

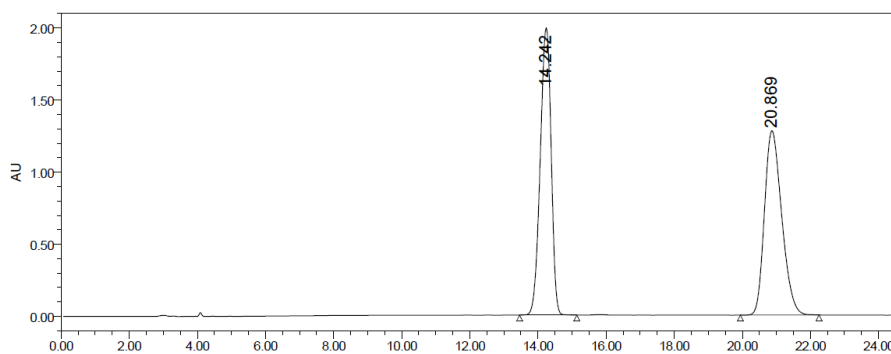

|   | Name | Retention time<br>(min) | Area<br>( $\mu\text{V}\cdot\text{s}$ ) | Height<br>( $\mu\text{V}$ ) | % Area |
|---|------|-------------------------|----------------------------------------|-----------------------------|--------|
| 1 |      | 14.242                  | 44262057                               | 1991021                     | 49.59  |
| 2 |      | 20.869                  | 44986243                               | 1277964                     | 50.41  |

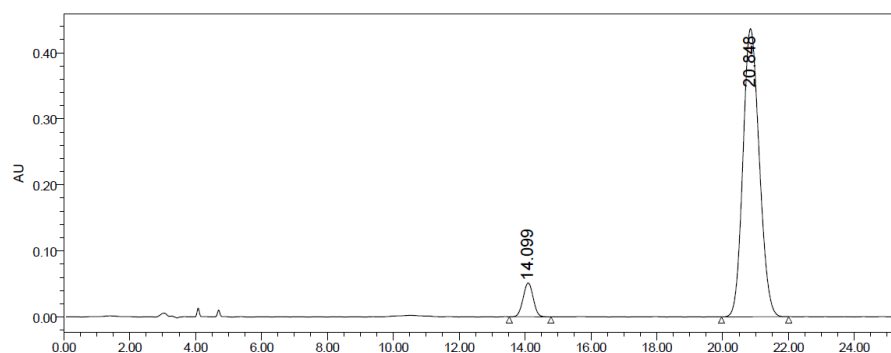

|   | Name | Retention time<br>(min) | Area<br>( $\mu\text{V}\cdot\text{s}$ ) | Height<br>( $\mu\text{V}$ ) | % Area |
|---|------|-------------------------|----------------------------------------|-----------------------------|--------|
| 1 |      | 14.099                  | 1092267                                | 51263                       | 6.78   |
| 2 |      | 20.848                  | 15008056                               | 436145                      | 93.22  |

**(S)-3-Benzoyl-3-(3-(furan-2-yl)-3-oxopropyl)tetrahydro-2H-pyran-2-one (3y)**

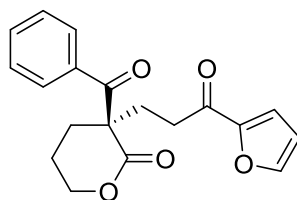

The title compound was purified by column chromatography on silica gel (PE : EA = 8:1 to 3:1), 31.9 mg, 98% yield, colorless oil,  $[\alpha]_D^{23} = +35.0$  (c 1.0,  $\text{CHCl}_3$ );  $^1\text{H NMR}$  (600 MHz,  $\text{CDCl}_3$ )  $\delta$  7.96 – 7.94 (m, 2 H), 7.57 – 7.54 (m, 2 H), 7.46 – 7.44 (m, 2 H), 7.18 – 7.17 (m, 1 H), 6.49 (q,  $J = 3.6, 1.8$  Hz, 1 H), 4.45 – 4.41 (m, 1 H), 4.23 – 4.18 (m, 1 H), 3.03 – 2.98 (m, 1 H), 2.91 – 2.86 (m, 1 H), 2.76 – 2.71 (m, 1 H), 2.57 – 2.54 (m, 2 H), 2.15 – 2.07 (m, 1 H), 2.01 – 1.95 (m, 1 H), 1.82 – 1.78 (m, 1 H).  $^{13}\text{C NMR}$  (150 MHz,  $\text{CDCl}_3$ )  $\delta$  196.1, 187.9, 172.3, 152.2, 146.3, 134.8, 133.3, 128.9, 128.7, 117.2, 112.1, 68.0, 57.3, 33.5, 30.2, 28.5, 19.7. HRMS (ESI-Orbitrap)  $m/z$ :  $[\text{M}+\text{H}]^+$  Calcd for  $\text{C}_{19}\text{H}_{19}\text{O}_5$  327.1223, found 327.1227.

The ee was determined by HPLC analysis. CHIRALPAK AS-H; Hexane/2-propanol = 70/30; flow rate 1.0 mL/min; 253.4 nm; retention time: 17.4 min (minor) and 20.2 min (major)

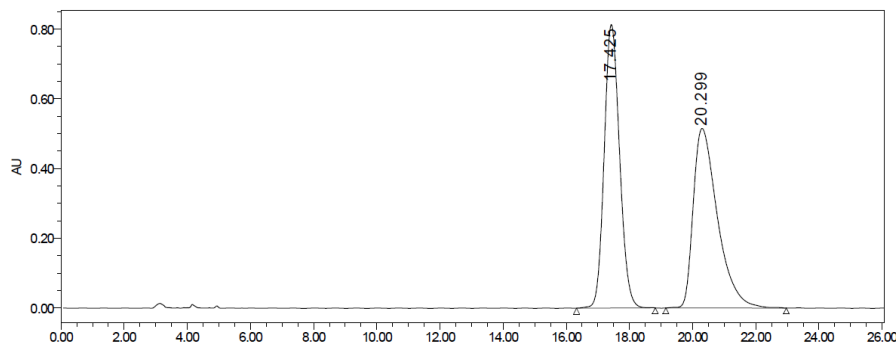

| Name | Retention time (min) | Area ( $\mu\text{V}\cdot\text{s}$ ) | Height ( $\mu\text{V}$ ) | % Area |
|------|----------------------|-------------------------------------|--------------------------|--------|
| 1    | 17.425               | 27506874                            | 813436                   | 50.01  |
| 2    | 20.299               | 27494015                            | 515264                   | 49.99  |

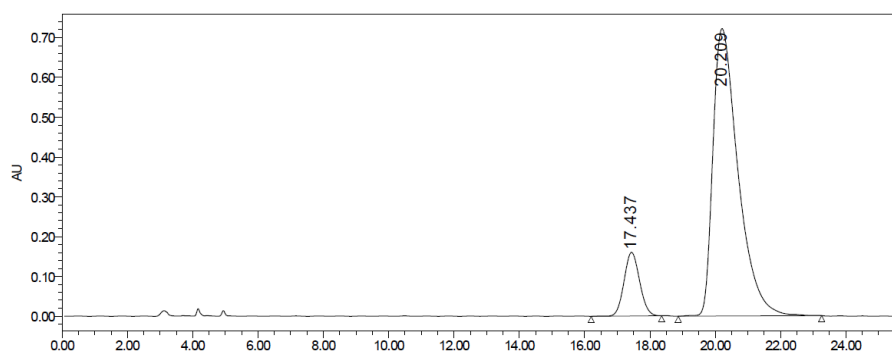

| Name | Retention time (min) | Area ( $\mu\text{V}\cdot\text{s}$ ) | Height ( $\mu\text{V}$ ) | % Area |
|------|----------------------|-------------------------------------|--------------------------|--------|
| 1    | 17.437               | 5298632                             | 159882                   | 12.06  |
| 2    | 20.209               | 38620811                            | 722352                   | 87.94  |

**(S)-3-Benzoyl-3-(3-oxo-3-phenylpropyl)dihydrofuran-2(3H)-one (3a)**

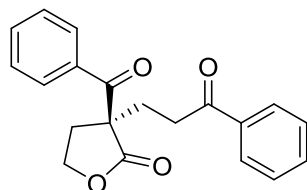

The title compound was purified by column chromatography on silica gel (PE : EA = 8:1 to 3:1), 30.2 mg, 94% yield, white solid, mp 95.7 - 96.4 °C,  $[\alpha]_D^{23} = +2.0$  (c 1.0, CHCl<sub>3</sub>); <sup>1</sup>H NMR (600 MHz, CDCl<sub>3</sub>) δ 8.07 – 8.06 (m, 2 H), 7.87 – 7.86 (m, 2 H), 7.59 – 7.57 (m, 1 H), 7.55 – 7.52 (m, 1 H), 7.47 (t, *J* = 7.8 Hz, 2 H), 7.42 (t, *J* = 7.8 Hz, 2 H), 4.49 – 4.40 (m, 2 H), 3.15 – 3.00 (m, 3 H), 2.69 – 2.64 (m, 1 H), 2.60 – 2.55 (m, 1 H), 2.34 – 2.30 (m, 1 H). <sup>13</sup>C NMR (150 MHz, CDCl<sub>3</sub>) δ 198.6, 195.6, 175.9, 136.4, 134.8, 133.4, 133.2, 129.2, 128.7, 128.6, 128.0, 66.2, 58.6, 33.8, 29.2. HRMS (ESI-Orbitrap) *m/z*: [M+H]<sup>+</sup> Calcd for C<sub>20</sub>H<sub>19</sub>O<sub>4</sub> 323.1276, found 323.1278.

The ee was determined by HPLC analysis. CHIRALPAK AS-H; Hexane/2-propanol = 70/30; flow rate 1.0 mL/min; 243.9 nm; retention time: 15.5 min (minor) and 17.1 min (major)

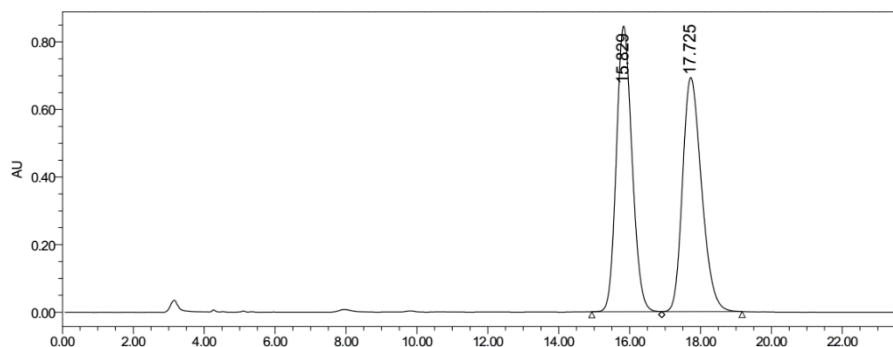

| Name | Retention time (min) | Area (μV*s) | Height (μV) | % Area |
|------|----------------------|-------------|-------------|--------|
| 1    | 15.829               | 25913677    | 845345      | 50.06  |
| 2    | 17.725               | 25852049    | 692904      | 49.94  |

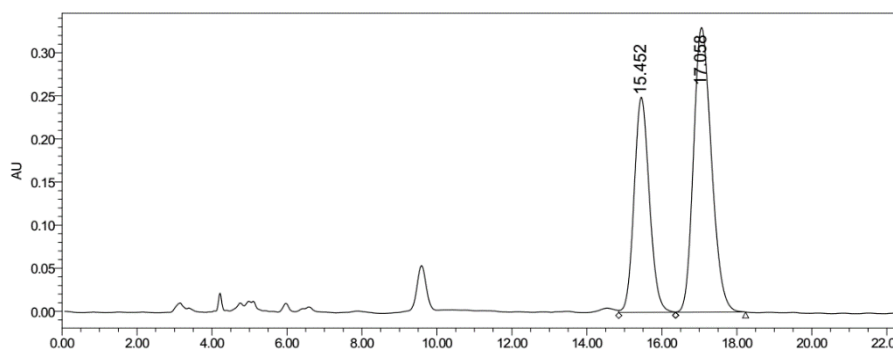

| Name | Retention time (min) | Area (μV*s) | Height (μV) | % Area |
|------|----------------------|-------------|-------------|--------|
| 1    | 15.452               | 7081457     | 249609      | 39.14  |
| 2    | 17.058               | 11013116    | 330239      | 60.86  |



**(S)-3-Acetyl-3-(3-oxo-3-phenylpropyl)dihydrofuran-2(3H)-one (3 $\beta$ )**

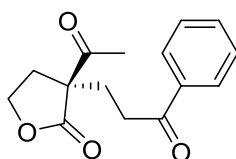

The title compound was purified by column chromatography on silica gel (PE : EA = 8:1 to 3:1), 25.5 mg, 98% yield, white solid, mp 67.8 - 69.1 °C,  $[\alpha]_D^{26} = +0.1$  (c 1.0, CHCl<sub>3</sub>); <sup>1</sup>H NMR (600 MHz, CDCl<sub>3</sub>)  $\delta$  7.85 (d,  $J = 7.2$  Hz, 2H), 7.52 – 7.49 (m, 1H), 7.39 (t,  $J = 7.8$  Hz, 2H), 4.30 – 4.26 (m, 1H), 4.15 – 4.11 (m, 1H), 2.93 – 2.79 (m, 3H), 2.45 – 2.40 (m, 1H), 2.31 – 2.26 (m, 1H), 2.30 (s, 3H), 2.05 – 2.00 (m, 1H). <sup>13</sup>C NMR (150 MHz, CDCl<sub>3</sub>)  $\delta$  202.6, 197.9, 175.4, 136.3, 133.4, 128.7, 128.0, 66.1, 60.5, 33.6, 29.9, 28.1, 25.8. HRMS (ESI-Orbitrap)  $m/z$ :  $[M+Na]^+$  Calcd for C<sub>15</sub>H<sub>16</sub>O<sub>4</sub>Na 283.0946, found 283.0948.

The ee was determined by HPLC analysis. CHIRALPAK AS-H; Hexane/2-propanol = 80/20; flow rate 1.0 mL/min; 240.4 nm; retention time: 15.9 min (minor) and 17.6 min (major)

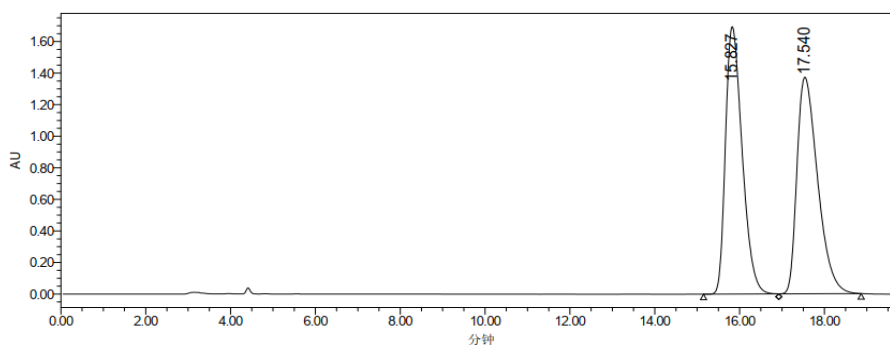

|   | Name | Retention time<br>(min) | Area<br>( $\mu V*s$ ) | Height<br>( $\mu V$ ) | % Area |
|---|------|-------------------------|-----------------------|-----------------------|--------|
| 1 |      | 15.827                  | 46283336              | 1693800               | 49.89  |
| 2 |      | 17.540                  | 46482488              | 1371739               | 50.11  |

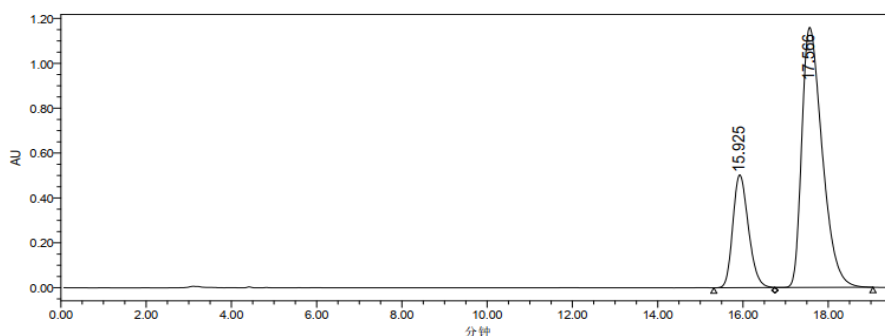

|   | Name | Retention time<br>(min) | Area<br>( $\mu V*s$ ) | Height<br>( $\mu V$ ) | % Area |
|---|------|-------------------------|-----------------------|-----------------------|--------|
| 1 |      | 15.925                  | 12789854              | 502835                | 24.91  |
| 2 |      | 17.566                  | 38557039              | 1158795               | 75.09  |

## 6. Gram-scale procedure for the preparation of (S) – 3p

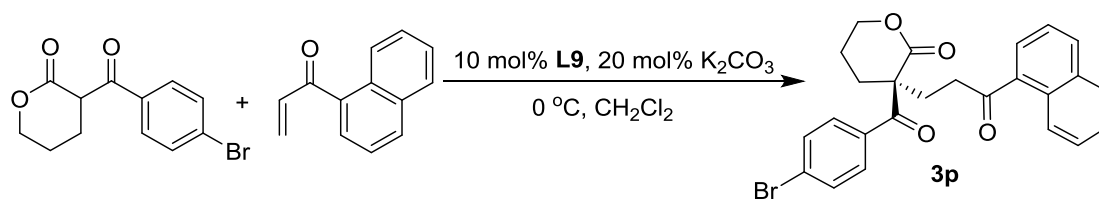

To the mixture of 2-(4-bromo)benzoyl- $\delta$ -valerolactone (0.843 mg, 3.0 mmol), catalyst **L9** (115.2 mg, 0.3 mmol), and  $K_2CO_3$  (82.8 mg, 0.02 mmol) in analytical purity grade dichloromethane (3 mL) was added  $\alpha$ -naphthyl vinyl ketone (655.2 mg, 3.6 mmol) at  $0^\circ C$ . The reaction was stirred for 6 days at  $0^\circ C$  to complete checked by thin layer chromatography. The mixture was directly submitted to preparative silica gel column chromatography (petroleum ether : ethyl acetate = 8:1 to 3:1) to furnish the product (S)-**3p** (1.32 g, 95% yield, 92% ee).

The ee was determined by HPLC analysis. CHIRALPAK AD-H; Hexane/2-propanol = 70/30; flow rate 1.0 mL/min; 298.5 nm; retention time: 18.2 min (minor) and 22.9 min (major)

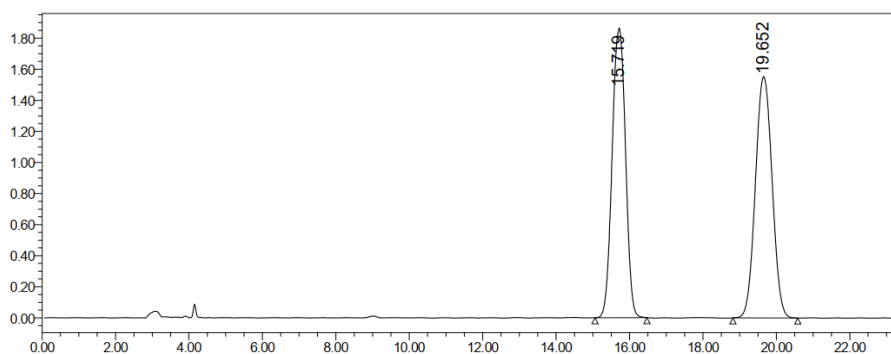

| Name | Retention time (min) | Area ( $\mu V*s$ ) | Height ( $\mu V$ ) | % Area |
|------|----------------------|--------------------|--------------------|--------|
| 1    | 15.719               | 47062714           | 1863653            | 48.94  |
| 2    | 19.652               | 49093298           | 1553437            | 51.06  |

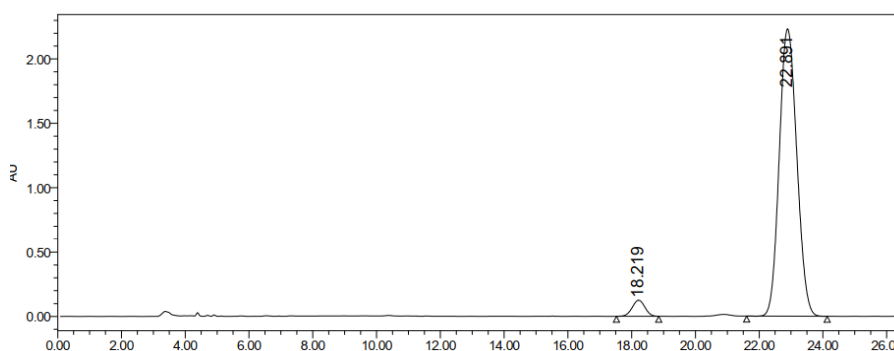

| Name | Retention time (min) | Area ( $\mu V*s$ ) | Height ( $\mu V$ ) | % Area |
|------|----------------------|--------------------|--------------------|--------|
| 1    | 18.219               | 3417732            | 124133             | 3.86   |
| 2    | 22.891               | 85230188           | 2230930            | 96.14  |

## 7. General procedure for the catalytic one-pot asymmetric synthesis of 4,4-dialkyl pyrazolones **4**

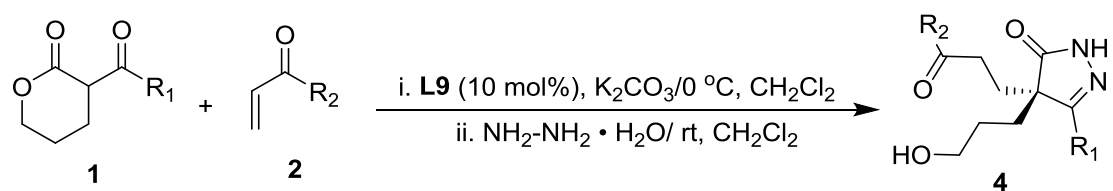

To the mixture of the lactone **1** (0.1 mmol), catalyst **L9** (3.8 mg, 0.01 mmol), and K<sub>2</sub>CO<sub>3</sub> (2.76 mg, 0.02 mmol) in analytical purity grade dichloromethane (0.5 mL) was added the vinyl ketone **2** (0.12 mmol). The reaction was stirred for 3 to 6 days at 0 °C to complete checked by thin layer chromatography. NH<sub>2</sub>NH<sub>2</sub>·H<sub>2</sub>O (0.5 mmol, 25.0 mg) was then added, and the mixture was stirred at room temperature for 3-4 h to complete checked by thin layer chromatography. The mixture was directly submitted to preparative silica gel column chromatography (PE : EA = 3:1 to DCM : MeOH = 50:1 ) to furnish the product **4**.

## 8. Characterization of compounds 4

### (S)-5-(2-Chlorophenyl)-4-(3-hydroxypropyl)-4-(3-oxo-3-phenylpropyl)-2,4-dihydro-3H-pyrazol-3-one (4a)

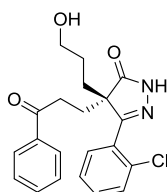

The title compound was purified by column chromatography on silica gel (PE : EA = 3:1 to DCM : MeOH = 50:1), 33.8 mg, 88% yield, white solid, mp: 171.5 – 172.1 °C,  $[\alpha]_D^{23} = -4.0$  (c 1.0, CHCl<sub>3</sub>); <sup>1</sup>H NMR (600 MHz, DMSO-d<sub>6</sub>) δ 11.80 (s, 1H), 7.82 – 7.80 (m, 2H), 7.63 – 7.61 (m, 2H), 7.54 – 7.45 (m, 4H), 4.53 (s, 1H), 3.40 – 3.33 (m, 3H), 2.98 – 2.93 (m, 1H), 2.83 – 2.77 (m, 1H), 2.06 – 1.88 (m, 3H), 1.79 – 1.73 (m, 1H), 1.37 – 1.28 (m, 1H). <sup>13</sup>C NMR (150 MHz, DMSO-d<sub>6</sub>) δ 198.6, 178.7, 158.2, 136.6, 133.7, 132.8, 131.4, 131.4, 130.6, 130.2, 129.2, 128.1, 128.0, 60.7, 56.7, 32.8, 31.2, 28.7, 27.7. HRMS (ESI-Orbitrap) m/z: Calcd for C<sub>21</sub>H<sub>22</sub>ClN<sub>2</sub>O<sub>3</sub> 385.1311, found 385.1313.

The ee was determined by HPLC analysis. CHIRALPAK OJ-H; Hexane/2-propanol = 70/30; flow rate 1.0 mL/min; 240.4 nm; retention time: 6.8 min (minor) and 10.2 min (major)

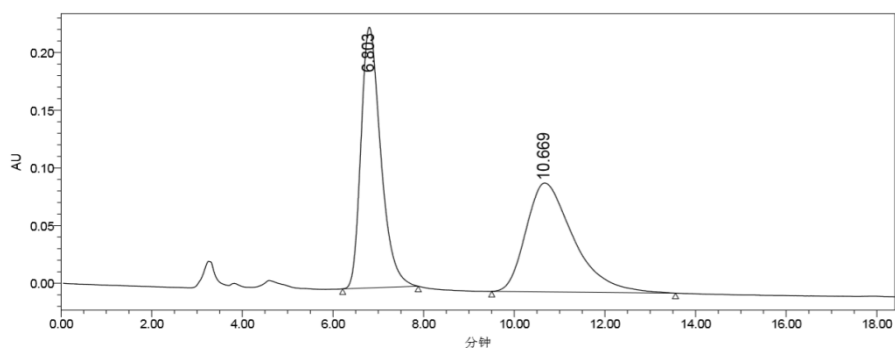

| Name | Retention time (min) | Area (μV*s) | Height (μV) | % Area |
|------|----------------------|-------------|-------------|--------|
| 1    | 6.803                | 6858574     | 225989      | 50.00  |
| 2    | 10.669               | 6857732     | 94360       | 50.00  |

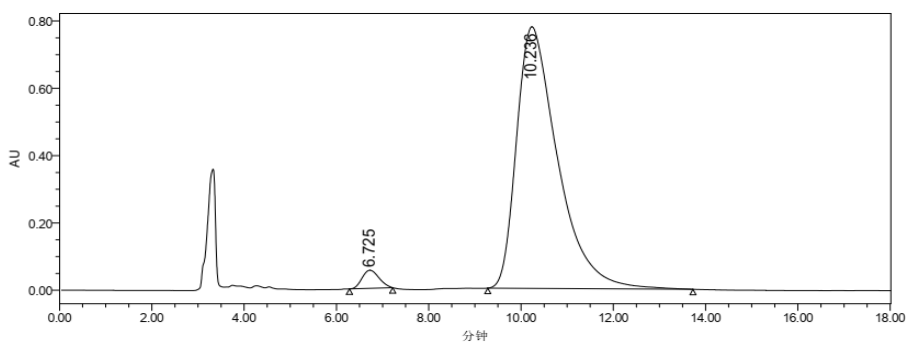

| Name | Retention time (min) | Area (μV*s) | Height (μV) | % Area |
|------|----------------------|-------------|-------------|--------|
| 1    | 6.725                | 1363806     | 53750       | 2.76   |
| 2    | 10.236               | 48046176    | 777388      | 97.24  |

**(S)-4-(3-Hydroxypropyl)-5-(naphthalen-1-yl)-4-(3-oxo-3-phenylpropyl)-2,4-dihydro-3H-pyrazol-3-one (4b)**

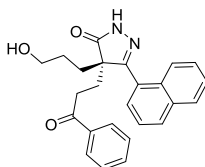

The title compound was purified by column chromatography on silica gel (PE : EA = 3:1 to DCM : MeOH = 50:1), 34.4 mg, 86% yield, colorless oil,  $[\alpha]_D^{23} = +17.0$  (c 1.0,  $\text{CHCl}_3$ );  $^1\text{H NMR}$  (600 MHz,  $\text{DMSO-d}_6$ )  $\delta$  11.90 (s, 1H), 8.77 (d,  $J = 8.4$  Hz, 1H), 8.05 (d,  $J = 8.4$  Hz, 1H), 8.00 (d,  $J = 7.8$  Hz, 1H), 7.74 (d,  $J = 6.6$  Hz, 1H), 7.68 (d,  $J = 7.2$  Hz, 2H), 7.63 – 7.56 (m, 4H), 7.41 (t,  $J = 7.8$  Hz, 2H), 4.48 (t,  $J = 5.4$  Hz, 1H), 3.36 – 3.33 (m, 1H), 3.31 – 3.27 (m, 1H), 2.84 – 2.72 (m, 1H), 2.78 – 2.71 (m, 1H), 2.20 – 2.15 (m, 1H), 2.10 – 2.04 (m, 2H), 1.86 – 1.81 (m, 1H), 1.30 – 1.24 (m, 1H).  $^{13}\text{C NMR}$  (150 MHz,  $\text{DMSO-d}_6$ )  $\delta$  198.6, 178.9, 159.9, 136.5, 134.4, 133.7, 131.1, 130.6, 129.2, 129.1, 128.5, 128.1, 127.7, 126.7, 126.6, 126.2, 125.7, 60.7, 57.2, 33.2, 32.6, 30.3, 28.1. HRMS (ESI-Orbitrap)  $m/z$ :  $[\text{M}+\text{H}]^+$  Calcd for  $\text{C}_{25}\text{H}_{25}\text{N}_2\text{O}_3$  401.1864, found 401.1860.

The ee was determined by HPLC analysis. CHIRALPAK AD-H; Hexane/2-propanol = 70/30; flow rate 1.0 mL/min; 312.8 nm; retention time: 8.6 min (minor) and 10.1 min (major)

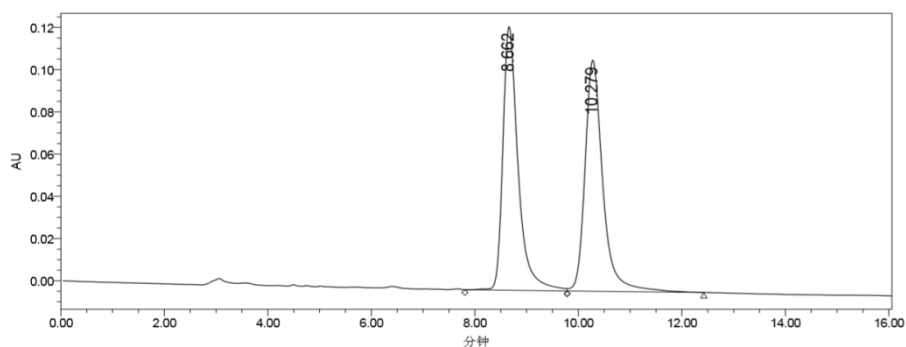

|   | Name | Retention time(min) | Area<br>( $\mu\text{V}\cdot\text{s}$ ) | Height<br>( $\mu\text{V}$ ) | % Area |
|---|------|---------------------|----------------------------------------|-----------------------------|--------|
| 1 |      | 8.662               | 2559415                                | 124842                      | 49.45  |
| 2 |      | 10.279              | 2616771                                | 109380                      | 50.55  |

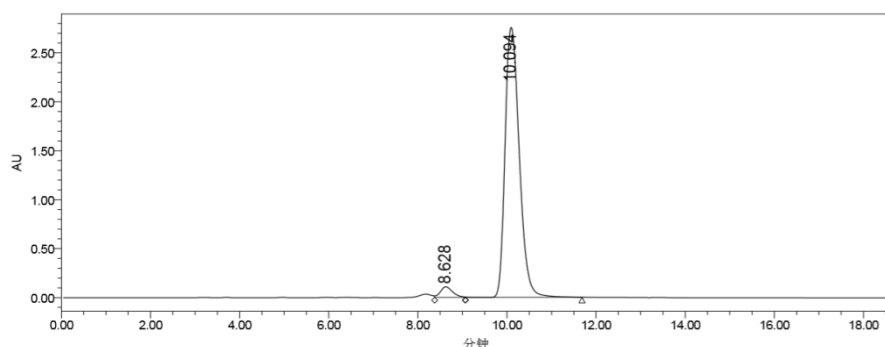

|   | Name | Retention time<br>(min) | Area<br>( $\mu\text{V}\cdot\text{s}$ ) | Height<br>( $\mu\text{V}$ ) | % Area |
|---|------|-------------------------|----------------------------------------|-----------------------------|--------|
| 1 |      | 8.628                   | 2038283                                | 108315                      | 3.23   |
| 2 |      | 10.094                  | 61110991                               | 2756388                     | 96.77  |

**(S)-4-(3-Hydroxypropyl)-4-(3-oxo-3-(p-tolyl)propyl)-5-phenyl-2,4-dihydro-3H-pyrazol-3-one (4c)**

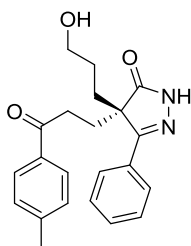

The title compound was purified by column chromatography on silica gel (PE : EA = 3:1 to DCM : MeOH = 50:1), 32.4 mg, 89% yield, colorless oil,  $[\alpha]_D^{23} = -4.0$  (c 1.0, CHCl<sub>3</sub>); <sup>1</sup>H NMR (600 MHz, DMSO-d<sub>6</sub>) δ 11.71 (s, 1H), 7.84 – 7.82 (m, 2H), 7.63 (d, *J* = 8.4 Hz, 2H), 7.49 – 7.45 (m, 3H), 7.25 (d, *J* = 7.8 Hz, 2H), 3.28 – 3.22 (m, 2H), 2.69 – 2.56 (m, 2H), 2.34 (s, 3H), 2.31 – 2.26 (m, 1H), 2.14 – 2.08 (m, 2H), 1.86 – 1.81 (m, 1H), 1.12 – 1.03 (m, 2H). <sup>13</sup>C NMR (150 MHz, DMSO-d<sub>6</sub>) δ 198.1, 179.6, 159.4, 144.1, 134.0, 131.7, 130.3, 129.7, 129.5, 128.3, 126.0, 60.7, 55.6, 33.2, 32.8, 28.1, 21.5. HRMS (ESI-Orbitrap) *m/z*: [M+H]<sup>+</sup> Calcd for C<sub>22</sub>H<sub>25</sub>N<sub>2</sub>O<sub>3</sub> 365.1866, found 365.1860.

The ee was determined by HPLC analysis. CHIRALPAK AD-H; Hexane/2-propanol = 70/30; flow rate 1.0 mL/min; 252.2 nm; retention time: 9.0 min (minor) and 12.0 min (major)

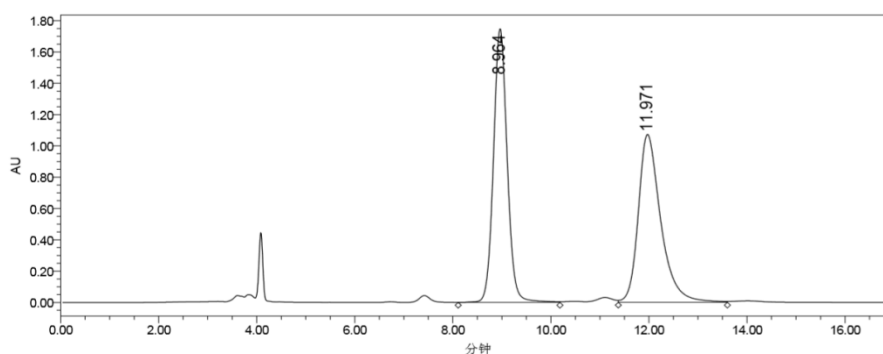

|   | Name | Retention time<br>(min) | Area<br>(μV*s) | Height<br>(μV) | % Area |
|---|------|-------------------------|----------------|----------------|--------|
| 1 |      | 8.964                   | 33945792       | 1748073        | 49.91  |
| 2 |      | 11.971                  | 34075021       | 1072607        | 50.09  |

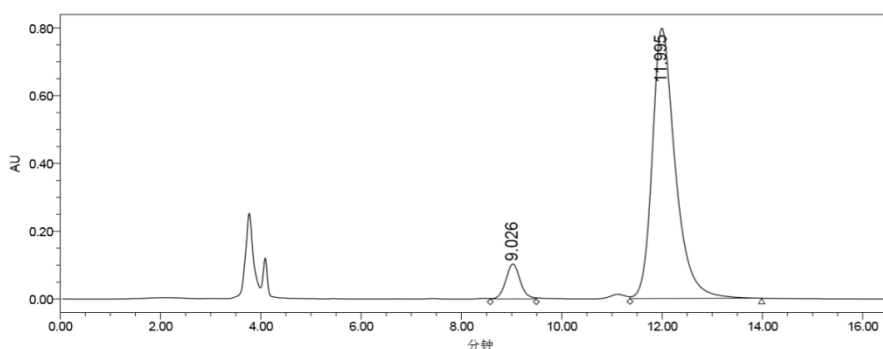

|   | Name | Retention time<br>(min) | Area<br>(μV*s) | Height<br>(μV) | % Area |
|---|------|-------------------------|----------------|----------------|--------|
| 1 |      | 9.026                   | 2051418        | 103198         | 7.47   |
| 2 |      | 11.995                  | 25419997       | 797667         | 92.53  |

**(S)-4-(3-Hydroxypropyl)-4-(3-oxo-3-(p-tolyl)propyl)-5-phenyl-2,4-dihydro-3H-pyrazol-3-one (4d)**

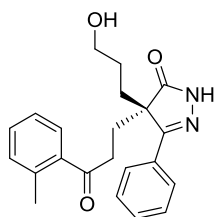

The title compound was purified by column chromatography on silica gel (PE : EA = 3:1 to DCM : MeOH = 50:1), 33.8 mg, 93% yield, colorless oil,  $[\alpha]_D^{23} = -3.0$  (c 1.0,  $\text{CHCl}_3$ );  $^1\text{H NMR}$  (600 MHz,  $\text{DMSO-d}_6$ )  $\delta$  11.68 (s, 1H), 7.83 – 7.81 (m, 2H), 7.49 – 7.45 (m, 4H), 7.38 (t,  $J = 7.2$  Hz, 1H), 7.24 – 7.20 (m, 2H), 4.39 (s, 1H), 3.28 – 3.22 (m, 2H), 2.65 – 2.60 (m, 1H), 2.57 – 2.52 (m, 1H), 2.31 – 2.27 (m, 1H), 2.26 (s, 3H), 2.14 – 2.07 (m, 2H), 1.86 – 1.81 (m, 1H), 1.12 – 1.01 (m, 2H).  $^{13}\text{C NMR}$  (150 MHz,  $\text{DMSO-d}_6$ )  $\delta$  202.6, 179.5, 159.4, 137.8, 137.2, 132.0, 131.7, 130.3, 129.5, 128.6, 126.3, 126.0, 60.7, 55.6, 36.3, 32.8, 30.5, 28.1, 20.9. HRMS (ESI-Orbitrap)  $m/z$ :  $[\text{M}+\text{H}]^+$  Calcd for  $\text{C}_{22}\text{H}_{25}\text{N}_2\text{O}_3$  365.1862, found 365.1860.

The ee was determined by HPLC analysis. CHIRALPAK OJ-H; Hexane/2-propanol = 70/30; flow rate 1.0 mL/min; 289.0 nm; retention time: 7.2 min (minor) and 10.6 min (major)

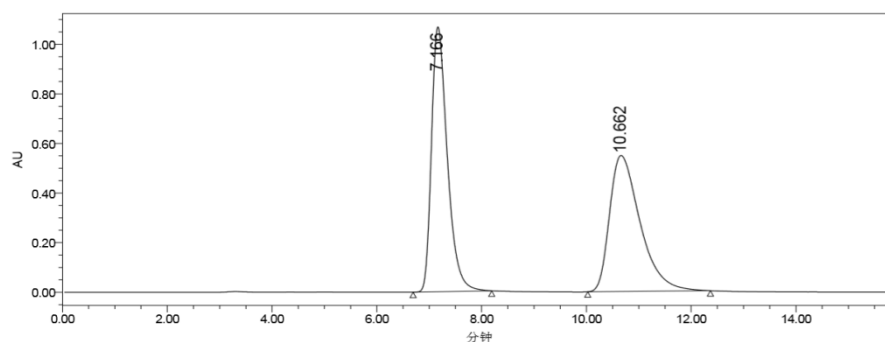

|   | Name | Retention time (min) | Area ( $\mu\text{V}\cdot\text{s}$ ) | Height ( $\mu\text{V}$ ) | % Area |
|---|------|----------------------|-------------------------------------|--------------------------|--------|
| 1 |      | 7.166                | 22407271                            | 1068152                  | 50.22  |
| 2 |      | 10.662               | 22208666                            | 548660                   | 49.78  |

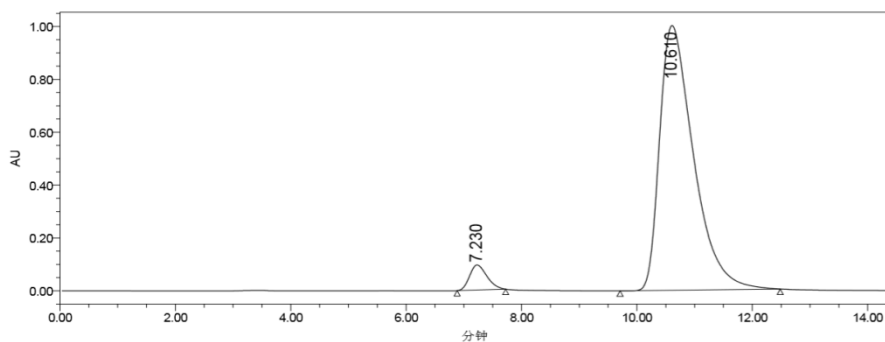

|   | Name | Retention time (min) | Area ( $\mu\text{V}\cdot\text{s}$ ) | Height ( $\mu\text{V}$ ) | % Area |
|---|------|----------------------|-------------------------------------|--------------------------|--------|
| 1 |      | 7.230                | 1970769                             | 94620                    | 4.61   |
| 2 |      | 10.610               | 40788244                            | 1001491                  | 95.39  |

**(S)-5-(4-Bromophenyl)-4-(2-hydroxyethyl)-4-(3-(naphthalen-1-yl)-3-oxopropyl)-2,4-dihydro-3H-pyrazol-3-one (4e)**

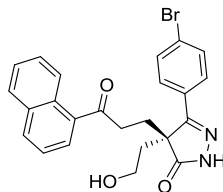

The title compound was purified by column chromatography on silica gel (PE : EA = 3:1 to DCM : MeOH = 50:1), 42.2 mg, 91% yield, colorless oil,  $[\alpha]_D^{23} = -4.0$  (c 1.0,  $\text{CHCl}_3$ );  $^1\text{H NMR}$  (600 MHz,  $\text{CDCl}_3$ )  $\delta$  9.31 (s, 1H), 8.44 (d,  $J = 8.4$  Hz, 1H), 7.93 (d,  $J = 8.4$  Hz, 1H), 7.83 – 7.82 (m, 1H), 7.71 – 7.66 (m, 3H), 7.57 – 7.48 (m, 3H), 7.39 – 7.37 (m, 1H), 3.56 – 3.49 (m, 2H), 3.00 – 2.95 (m, 1H), 2.76 – 2.70 (m, 1H), 2.54 – 2.44 (m, 2H), 2.17 – 2.14 (m, 2H), 1.69 (s, 2H).  $^{13}\text{C NMR}$  (150 MHz,  $\text{CDCl}_3$ )  $\delta$  201.7, 179.2, 170.9, 159.3, 134.9, 133.8, 133.0, 132.4, 130.0, 129.8, 128.4, 128.0, 127.7, 127.3, 126.5, 125.5, 125.0, 124.2, 63.4, 55.6, 36.2, 32.8, 30.8, 23.8, 20.8. HRMS (ESI-Orbitrap)  $m/z$ :  $[\text{M}+\text{H}]^+$  Calcd for  $\text{C}_{24}\text{H}_{22}\text{BrN}_2\text{O}_3$  479.0965, found 479.0964.

The ee was determined by HPLC analysis. CHIRALPAK OJ-H; Hexane/2-propanol = 70/30; flow rate 1.0 mL/min; 298.5 nm; retention time: 9.4 min (minor) and 18.4 min (major)

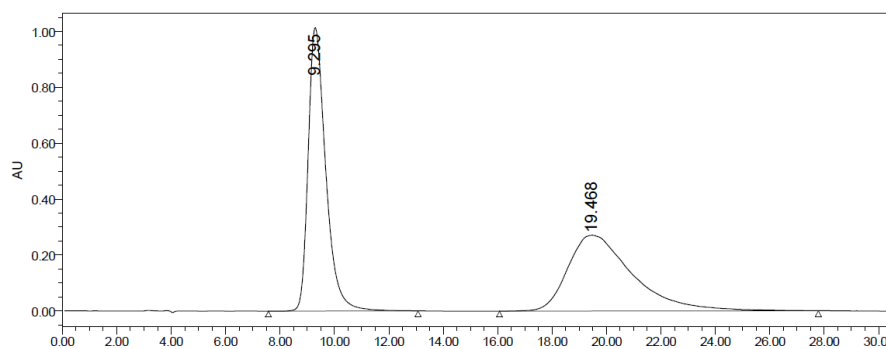

|   | Name | Retention time<br>(min) | Area<br>( $\mu\text{V}\cdot\text{s}$ ) | Height<br>( $\mu\text{V}$ ) | % Area |
|---|------|-------------------------|----------------------------------------|-----------------------------|--------|
| 1 |      | 9.295                   | 45513152                               | 1013369                     | 50.40  |
| 2 |      | 19.468                  | 44781997                               | 271301                      | 49.60  |

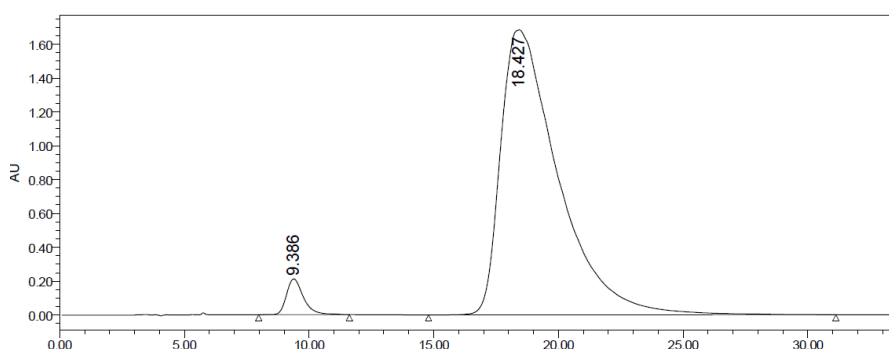

|   | Name | Retention time<br>(min) | Area<br>( $\mu\text{V}\cdot\text{s}$ ) | Height<br>( $\mu\text{V}$ ) | % Area |
|---|------|-------------------------|----------------------------------------|-----------------------------|--------|
| 1 |      | 9.386                   | 9944674                                | 211009                      | 3.55   |
| 2 |      | 18.427                  | 270452307                              | 1683511                     | 96.45  |



**(S)-5-(2-Chlorophenyl)-4-(3-hydroxypropyl)-4-(3-(naphthalen-1-yl)-3-oxopropyl)-2,4-dihydro-3H-pyrazol-3-one (4f)**

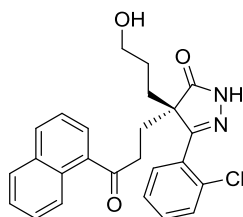

The title compound was purified by column chromatography on silica gel (PE : EA = 3:1 to DCM : MeOH = 50:1), 40.3 mg, 93% yield, white solid, mp 121.0 – 123.5 °C,  $[\alpha]_D^{23} = -18.0$  (c 1.0, CHCl<sub>3</sub>); <sup>1</sup>H NMR (600 MHz, DMSO-d<sub>6</sub>) δ 11.79 (s, 1H), 8.35 – 8.34 (m, 1H), 8.12 (d, *J* = 8.4 Hz, 1H), 8.00 – 7.98 (m, 1H), 7.86 (d, *J* = 7.2 Hz, 1H), 7.63 – 7.54 (m, 4H), 7.51 – 7.46 (m, 2H), 4.53 (t, *J* = 5.4 Hz, 1H), 3.41 – 3.34 (m, 2H), 3.07 – 3.01 (m, 1H), 2.92 – 2.86 (m, 1H), 2.15 – 2.10 (m, 1H), 2.06 – 2.01 (m, 1H), 1.93 – 1.88 (m, 1H), 1.79 – 1.74 (m, 1H), 1.36 – 1.28 (m, 1H), 0.89 – 0.84 (m, 1H). <sup>13</sup>C NMR (150 MHz, DMSO-d<sub>6</sub>) δ 202.8, 178.7, 158.2, 135.7, 133.9, 132.9, 132.8, 131.4 (d, *J* = 4.5 Hz), 130.6, 130.2, 129.7, 128.9, 128.2, 128.0 (d, *J* = 4.5 Hz), 126.9, 125.7, 125.2, 60.7, 56.6, 36.4, 31.1, 28.9, 27.7. HRMS (ESI-Orbitrap) *m/z*: [M+H]<sup>+</sup> Calcd for C<sub>25</sub>H<sub>24</sub>ClN<sub>2</sub>O<sub>3</sub> 435.1468, found 435.1470.

The ee was determined by HPLC analysis. CHIRALPAK OJ-H; Hexane/2-propanol = 65/35; flow rate 1.0 mL/min; 286.6 nm; retention time: 10.9 min (minor) and 16.7 min (major)

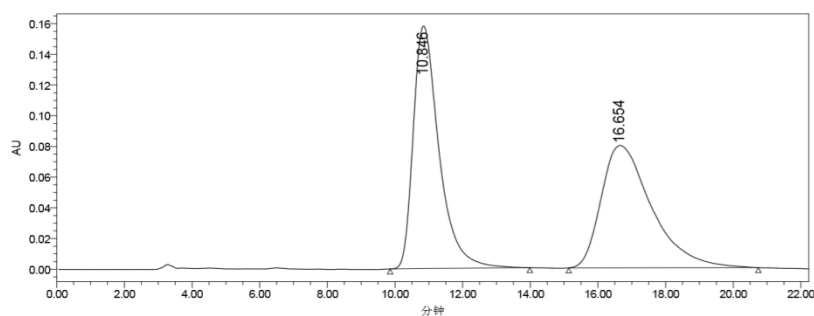

|   | Name | Retention time<br>(min) | Area<br>(μV*s) | Height<br>(μV) | % Area |
|---|------|-------------------------|----------------|----------------|--------|
| 1 |      | 10.846                  | 8374067        | 158013         | 50.40  |
| 2 |      | 16.654                  | 8241141        | 79709          | 49.60  |

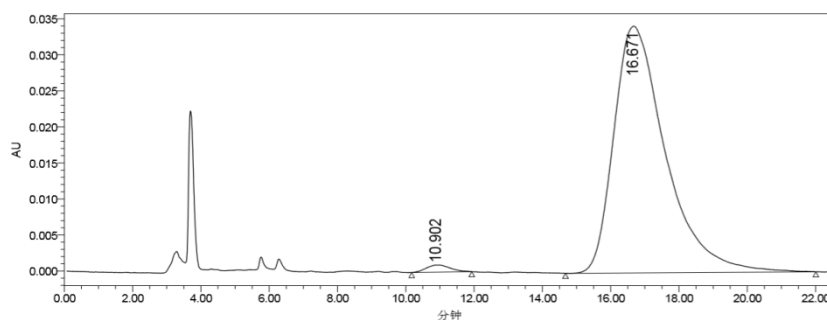

|   | Name | Retention time<br>(min) | Area<br>(μV*s) | Height<br>(μV) | % Area |
|---|------|-------------------------|----------------|----------------|--------|
| 1 |      | 10.902                  | 48783          | 1009           | 1.34   |
| 2 |      | 16.671                  | 3602658        | 34256          | 98.66  |

**(S)-5-(3-Chlorophenyl)-4-(3-hydroxypropyl)-4-(3-(naphthalen-1-yl)-3-oxopropyl)-2,4-dihydro-3H-pyrazol-3-one (4g)**

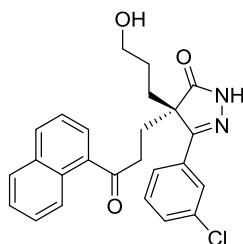

The title compound was purified by column chromatography on silica gel (PE : EA = 3:1 to DCM : MeOH = 50:1), 40.8 mg, 94% yield, colorless oil,  $[\alpha]_D^{23} = +9.0$  (c 1.0,  $\text{CHCl}_3$ );  $^1\text{H NMR}$  (600 MHz,  $\text{DMSO-d}_6$ )  $\delta$  11.84 (s, 1H), 8.26 – 8.24 (m, 1H), 8.09 (d,  $J = 8.4$  Hz, 1H), 7.98 – 7.97 (m, 1H), 7.82 – 7.81 (m, 2H), 7.79 – 7.77 (m, 1H), 7.58 – 7.50 (m, 4H), 4.42 (t,  $J = 4.8$  Hz, 1H), 3.29 – 3.24 (m, 2H), 2.87 – 2.82 (m, 1H), 2.79 – 2.74 (m, 1H), 2.47 – 2.42 (m, 1H), 2.25 – 2.20 (m, 1H), 2.16 – 2.11 (m, 1H), 1.89 – 1.84 (m, 1H), 1.12 – 1.00 (m, 2H).  $^{13}\text{C NMR}$  (150 MHz,  $\text{DMSO-d}_6$ )  $\delta$  202.6, 179.5, 158.0, 135.4, 134.3, 133.8, 133.6, 132.9, 131.5, 130.1, 129.6, 128.9, 128.2, 128.1, 126.8, 125.6, 125.3, 125.2, 124.7, 60.7, 55.6, 40.4, 36.7, 32.7, 30.5, 28.1. HRMS (ESI-Orbitrap)  $m/z$ :  $[\text{M}+\text{H}]^+$  Calcd for  $\text{C}_{25}\text{H}_{24}\text{ClN}_2\text{O}_3$  435.1469, found 435.1470.

The ee was determined by HPLC analysis. CHIRALPAK AD-H; Hexane/2-propanol = 70/30; flow rate 1.0 mL/min; 294.9 nm; retention time: 8.8 min (minor) and 12.2 min (major)

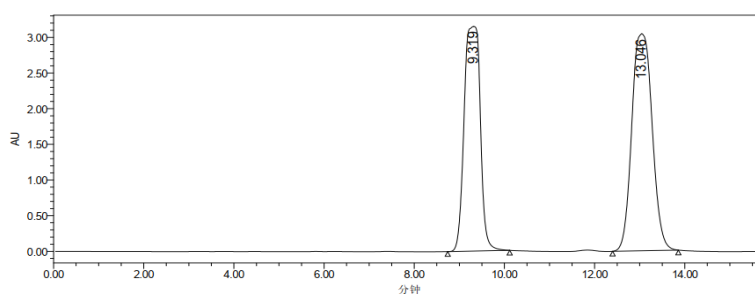

|   | Name | Retention time<br>(min) | Area<br>( $\mu\text{V}\cdot\text{s}$ ) | Height<br>( $\mu\text{V}$ ) | % Area |
|---|------|-------------------------|----------------------------------------|-----------------------------|--------|
| 1 |      | 9.319                   | 78606397                               | 3148542                     | 45.16  |
| 2 |      | 13.046                  | 95436725                               | 3042109                     | 54.84  |

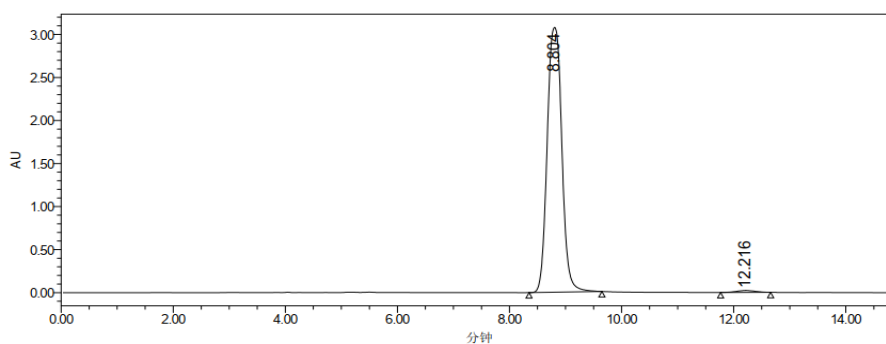

|   | Name | Retention time<br>(min) | Area<br>( $\mu\text{V}\cdot\text{s}$ ) | Height<br>( $\mu\text{V}$ ) | % Area |
|---|------|-------------------------|----------------------------------------|-----------------------------|--------|
| 1 |      | 8.804                   | 55650311                               | 3076191                     | 99.11  |
| 2 |      | 12.216                  | 497950                                 | 21533                       | 0.89   |

**(S)-4-(4-(3-Hydroxypropyl)-4-(3-(naphthalen-1-yl)-3-oxopropyl)-5-oxo-4,5-dihydro-1H-pyrazol-3-yl)benzotrile (4h)**

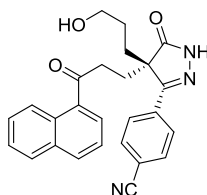

The title compound was purified by column chromatography on silica gel (PE : EA = 3:1 to DCM : MeOH = 50:1), 38.2 mg, 90% yield, colorless oil,  $[\alpha]_D^{23} = -9.0$  (c 1.0,  $\text{CHCl}_3$ );  $^1\text{H NMR}$  (600 MHz,  $\text{DMSO-d}_6$ )  $\delta$  11.99 (s, 1H), 8.24 (d,  $J = 8.4$  Hz, 1H), 8.09 (d,  $J = 8.4$  Hz, 1H), 8.01 (d,  $J = 7.8$  Hz, 2H), 7.97 (d,  $J = 7.2$  Hz, 1H), 7.91 (d,  $J = 9.0$  Hz, 2H), 7.82 (d,  $J = 7.2$  Hz, 1H), 7.57 – 7.51 (m, 3H), 4.41 (t,  $J = 5.4$  Hz, 1H), 3.28 – 3.23 (m, 2H), 2.88 – 2.82 (m, 1H), 2.77 – 2.72 (m, 1H), 2.49 – 2.45 (m, 1H), 2.26 – 2.21 (m, 1H), 2.19 – 2.14 (m, 1H), 1.90 – 1.85 (m, 1H), 1.11 – 0.96 (m, 2H).  $^{13}\text{C NMR}$  (150 MHz,  $\text{DMSO-d}_6$ )  $\delta$  202.5, 179.6, 157.8, 135.6, 135.3, 133.8, 133.3, 132.9, 129.6, 128.9, 128.2, 128.1, 126.8, 126.6, 125.6, 125.2, 118.9, 112.4, 60.6, 55.6, 36.7, 32.7, 30.4, 28.1. HRMS (ESI-Orbitrap)  $m/z$ :  $[\text{M}+\text{H}]^+$  Calcd for  $\text{C}_{26}\text{H}_{24}\text{N}_3\text{O}_3$  426.1810, found 426.12.

The ee was determined by HPLC analysis. CHIRALPAK OJ-H; Hexane/2-propanol = 70/30; flow rate 1.0 mL/min; 305.6 nm; retention time: 22.0 min (minor) and 47.1 min (major)

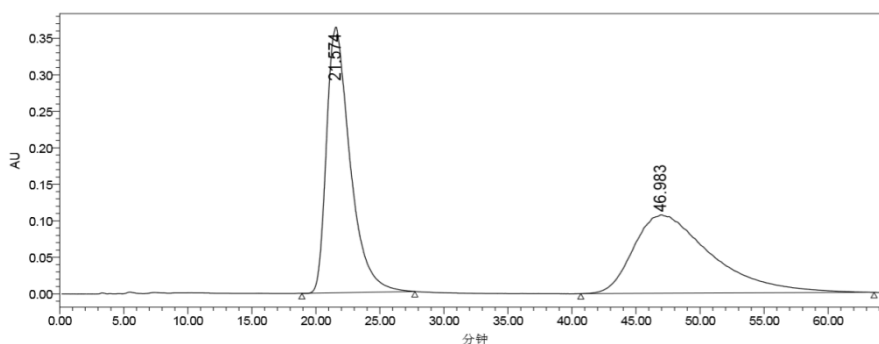

|   | Name | Retention time<br>(min) | Area<br>( $\mu\text{V}\cdot\text{s}$ ) | Height<br>( $\mu\text{V}$ ) | % Area |
|---|------|-------------------------|----------------------------------------|-----------------------------|--------|
| 1 |      | 21.574                  | 46599022                               | 363949                      | 50.66  |
| 2 |      | 46.983                  | 45383813                               | 107592                      | 49.34  |

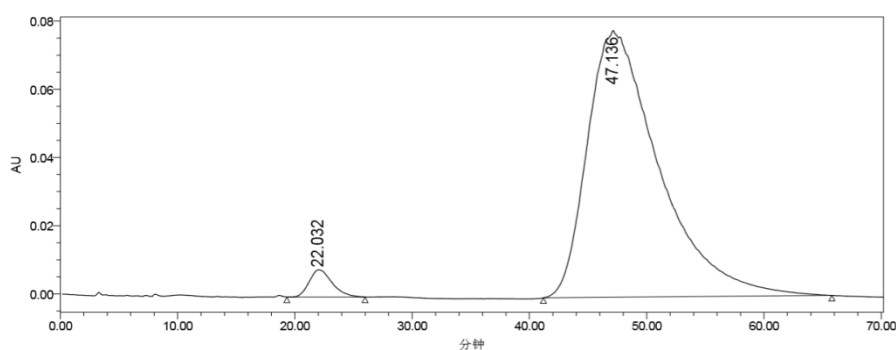

|   | Name | Retention time<br>(min) | Area<br>( $\mu\text{V}\cdot\text{s}$ ) | Height<br>( $\mu\text{V}$ ) | % Area |
|---|------|-------------------------|----------------------------------------|-----------------------------|--------|
| 1 |      | 22.032                  | 109257                                 | 8006                        | 3.19   |
| 2 |      | 47.136                  | 33199286                               | 78231                       | 96.81  |

**(S)-4-(3-Hydroxypropyl)-5-(naphthalen-1-yl)-4-(3-(naphthalen-1-yl)-3-oxopropyl)-2,4-dihydro-3H-pyrazol-3-one (4i)**

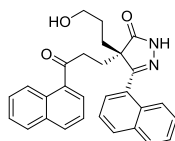

The title compound was purified by column chromatography on silica gel (PE : EA = 3:1 to DCM : MeOH = 50:1), 41.4 mg, 92% yield, white solid, mp 186.3 - 189.0 °C,  $[\alpha]_D^{23} = +29.0$  (c 1.0, CHCl<sub>3</sub>); <sup>1</sup>H NMR (600 MHz, DMSO-d<sub>6</sub>) δ 11.90 (s, 1H), 8.75 (d, *J* = 8.4 Hz, 1H), 8.24 (d, *J* = 8.4 Hz, 1H), 8.07 – 8.01 (m, 3H), 7.95 (d, *J* = 7.8 Hz, 1H), 7.77 (d, *J* = 7.2 Hz, 1H), 7.66 (d, *J* = 7.2 Hz, 1H), 7.63 – 7.50 (m, 5H), 7.45 – 7.42 (m, 1H), 4.44 (s, 1H), 2.95 – 2.90 (m, 1H), 2.87 – 2.81 (m, 1H), 2.30 – 2.25 (m, 1H), 2.17 – 2.06 (m, 2H), 1.87 – 1.82 (m, 1H), 1.30 – 1.17 (m, 3H), 0.89 – 0.85 (m, 1H). <sup>13</sup>C NMR (150 MHz, DMSO-d<sub>6</sub>) δ 202.7, 178.9, 159.9, 135.4, 134.4, 133.8, 132.8, 131.1, 130.6, 129.6, 129.2, 128.8, 128.5, 128.1, 128.0, 127.7, 126.8, 126.7, 126.6, 126.2, 125.7, 125.6, 125.1, 60.7, 57.2, 36.7, 32.5, 30.4, 28.1. HRMS (ESI-Orbitrap) *m/z*: [M+H]<sup>+</sup> Calcd for C<sub>29</sub>H<sub>27</sub>N<sub>2</sub>O<sub>3</sub> 451.2017, found 451.2016.

The ee was determined by HPLC analysis. CHIRALPAK AD-H; Hexane/2-propanol = 70/30; flow rate 1.0 mL/min; 220.3 nm; retention time: 24.3 min (minor) and 25.9 min (major)

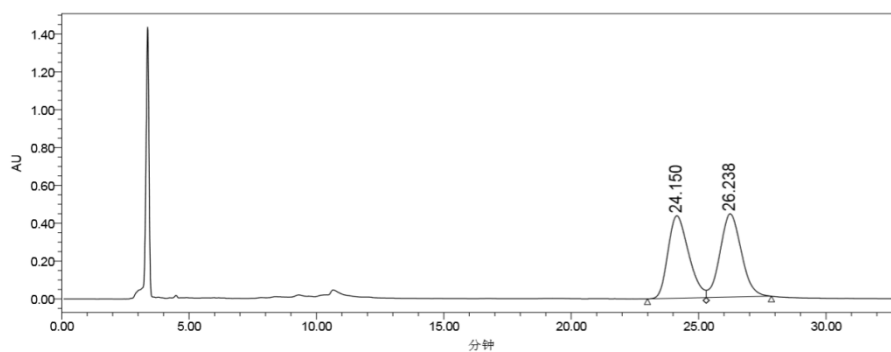

|   | Name | Retention time<br>(min) | Area<br>(μV*s) | Height<br>(μV) | % Area |
|---|------|-------------------------|----------------|----------------|--------|
| 1 |      | 24.150                  | 24583462       | 435866         | 49.04  |
| 2 |      | 26.238                  | 25542193       | 440348         | 50.96  |

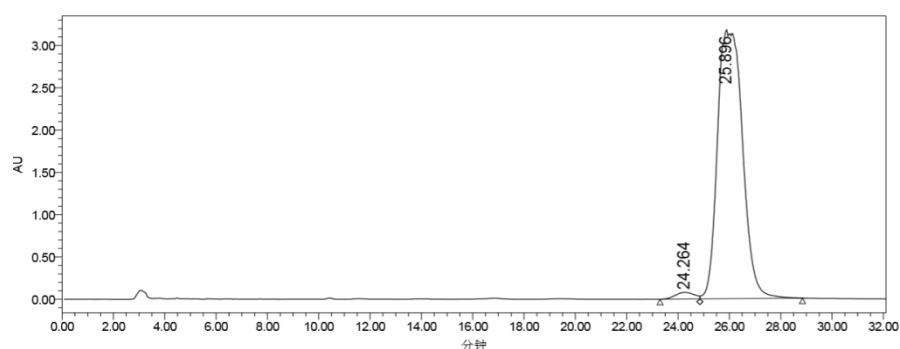

|   | Name | Retention time<br>(min) | Area<br>(μV*s) | Height<br>(μV) | % Area |
|---|------|-------------------------|----------------|----------------|--------|
| 1 |      | 24.264                  | 4013611        | 79233          | 1.82   |
| 2 |      | 25.896                  | 216126722      | 3181522        | 98.18  |

**(S)-4-(3-Hydroxypropyl)-4-(3-(4-methoxynaphthalen-1-yl)-3-oxopropyl)-5-phenyl-2,4-dihydro-3H-pyrazol-3-one (4j)**

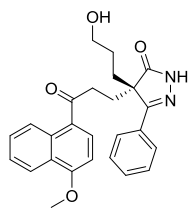

The title compound was purified by column chromatography on silica gel (PE : EA = 3:1 to DCM : MeOH = 50:1), 36.5 mg, 85% yield, white solid, mp 209.0 - 211.2 °C,  $[\alpha]_D^{23} = +5.0$  (c 1.0, CHCl<sub>3</sub>); <sup>1</sup>H NMR (600 MHz, DMSO-d<sub>6</sub>) δ 11.70 (s, 1H), 8.60 (d, *J* = 8.4 Hz, 1H), 8.20 (d, *J* = 8.4 Hz, 1H), 7.87 – 7.84 (m, 3H), 7.59 – 7.52 (m, 2H), 7.49 – 7.46 (m, 3H), 6.94 (d, *J* = 8.4 Hz, 1H), 4.39 (s, 1H), 4.03 (s, 3H), 3.26 – 3.25 (m, 2H), 2.81 – 2.76 (m, 1H), 2.71 – 2.66 (m, 1H), 2.41 – 2.36 (m, 1H), 2.22 – 2.09 (m, 1H), 1.90 – 1.83 (m, 2H), 1.12 – 1.04 (m, 2H). <sup>13</sup>C NMR (150 MHz, DMSO-d<sub>6</sub>) δ 200.6, 179.6, 159.4, 158.7, 131.8, 131.6 (d, *J* = 9.0 Hz), 130.3, 129.7, 128.8, 126.7, 126.3, 126.0, 125.4, 122.1, 103.5, 60.8, 56.5, 55.7, 35.8, 31.2, 28.1. HRMS (ESI-Orbitrap) *m/z*: [M+H]<sup>+</sup> Calcd for C<sub>26</sub>H<sub>27</sub>N<sub>2</sub>O<sub>3</sub> 431.1963 found 431.1965.

The ee was determined by HPLC analysis. CHIRALPAK OJ-H; Hexane/2-propanol = 70/30; flow rate 1.0 mL/min; 298.5 nm; retention time: 11.5 min (minor) and 27.1 min (major)

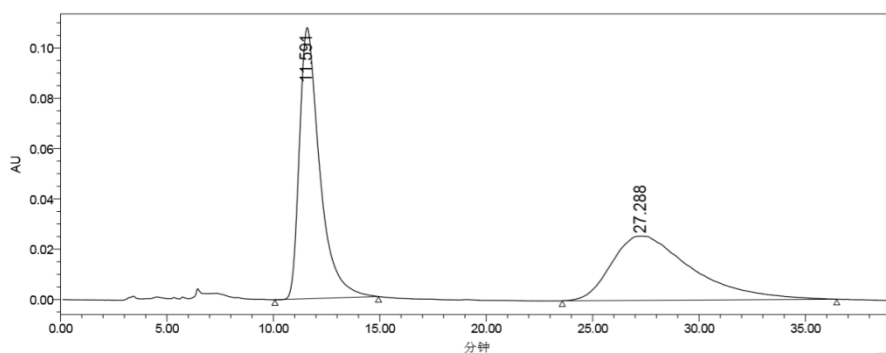

|   | Name | Retention time<br>(min) | Area<br>(μV*s) | Height<br>(μV) | % Area |
|---|------|-------------------------|----------------|----------------|--------|
| 1 |      | 11.591                  | 7150202        | 107809         | 51.61  |
| 2 |      | 27.288                  | 6703869        | 25498          | 48.39  |

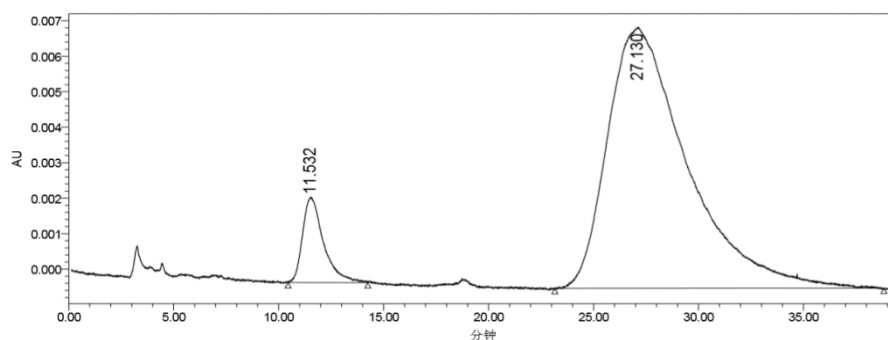

|   | Name | Retention time<br>(min) | Area<br>(μV*s) | Height<br>(μV) | % Area |
|---|------|-------------------------|----------------|----------------|--------|
| 1 |      | 11.532                  | 166970         | 2414           | 7.93   |
| 2 |      | 27.130                  | 1937454        | 7365           | 92.07  |

## 9. Gram-scale procedure for the preparation of (S) - 4f

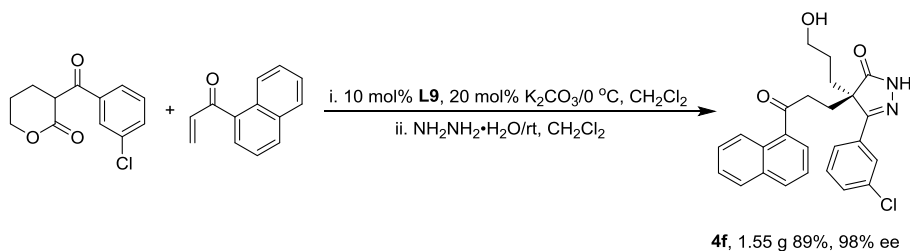

To the mixture of 2-(3-chloro)benzoyl- $\delta$ -valerolactone (952 mg, 4.0 mmol), catalyst **L9** (154.0 mg, 0.4 mmol), and  $K_2CO_3$  (110 mg, 0.8 mmol) in analytical purity grade dichloromethane (3.0 mL) was added  $\alpha$ -naphthyl vinyl ketone (873 mg, 4.8 mmol) at 0 °C. The reaction was stirred for 6 days at 0 °C to completion checked by TLC.  $NH_2NH_2 \cdot H_2O$  (100 mg, 20.0 mmol) was then added, and the mixture was stirred at room temperature for another 5 h to completion checked by TLC. The mixture was directly submitted to preparative silica gel column chromatography (PE : EA = 3:1 to DCM : MeOH = 50:1) to furnish the product (S)- **4f** (1.55 g, 89% yield, 98% ee).

The ee was determined by HPLC analysis. CHIRALPAK AD-H; Hexane/2-propanol = 70/30; flow rate 1.0 mL/min; 294.9 nm; retention time: 8.8 min (minor) and 12.3 min (major)

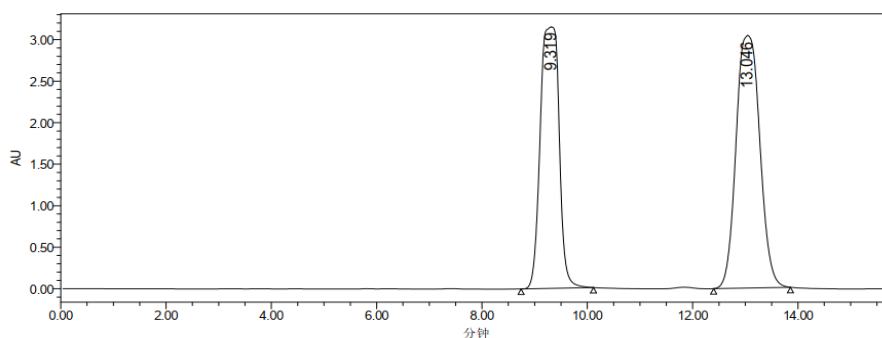

|   | Name | Retention time<br>(min) | Area<br>( $\mu V \cdot s$ ) | Height<br>( $\mu V$ ) | % Area |
|---|------|-------------------------|-----------------------------|-----------------------|--------|
| 1 |      | 9.319                   | 78606397                    | 3148542               | 45.16  |
| 2 |      | 13.046                  | 95436725                    | 3042109               | 54.84  |

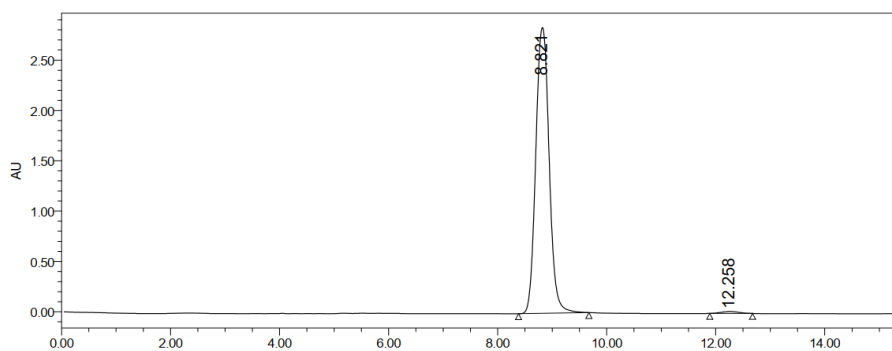

|   | Name | Retention time<br>(min) | Area<br>( $\mu V \cdot s$ ) | Height<br>( $\mu V$ ) | % Area |
|---|------|-------------------------|-----------------------------|-----------------------|--------|
| 1 |      | 8.821                   | 48320675                    | 2839802               | 99.12  |
| 2 |      | 12.258                  | 431196                      | 19168                 | 0.88   |

## 10. Exploration of the process of pyrazolone formation

To the solution of **3o** (0.05 mmol, 20 mg) in 0.5 mL CH<sub>2</sub>Cl<sub>2</sub> was added hydrazine hydrate (0.25 mmol, 12.5 mg) and the reaction was stirred at room temperature for 15 min, a small sample was taken out to directly perform the HRMS detection of the reaction mixture.

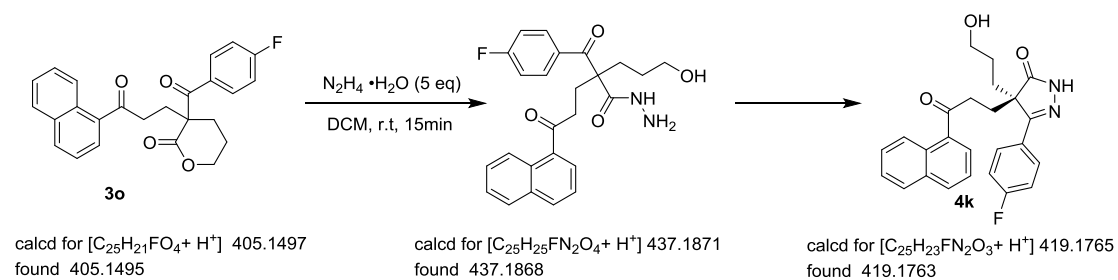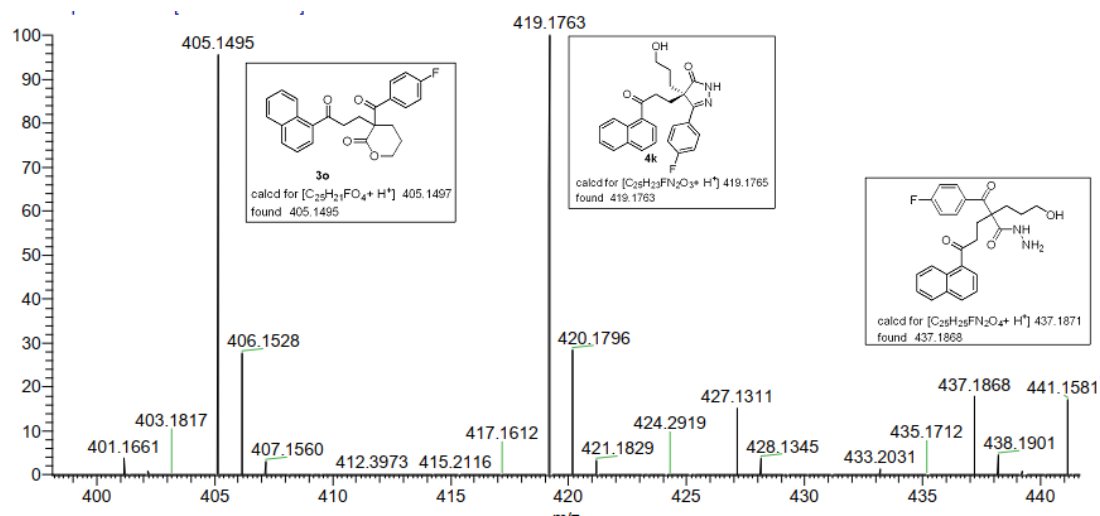

## 11. Single crystal data, structural refinement and measurement of 3p

**3p** (CCDC Number: 2011405)

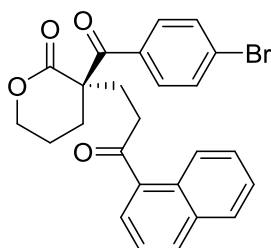

**(S)-3p**

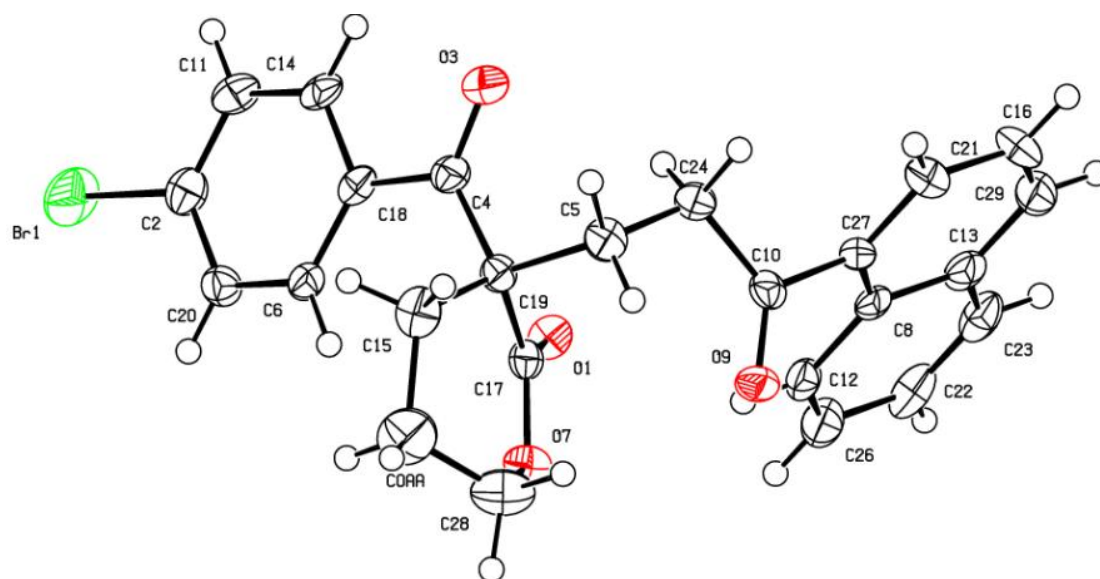

**Table 1 Crystal data and structure refinement for zhaopf\_0415.**

|                                    |                                                  |
|------------------------------------|--------------------------------------------------|
| Identification code                | zhaopf_0415                                      |
| Empirical formula                  | C <sub>25</sub> H <sub>21</sub> BrO <sub>4</sub> |
| Formula weight                     | 465.33                                           |
| Temperature/K                      | 292.90(10)                                       |
| Crystal system                     | orthorhombic                                     |
| Space group                        | P2 <sub>1</sub> 2 <sub>1</sub> 2 <sub>1</sub>    |
| a/Å                                | 10.0294(4)                                       |
| b/Å                                | 10.8154(6)                                       |
| c/Å                                | 19.2909(9)                                       |
| α/°                                | 90                                               |
| β/°                                | 90                                               |
| γ/°                                | 90                                               |
| Volume/Å <sup>3</sup>              | 2092.51(17)                                      |
| Z                                  | 4                                                |
| ρ <sub>calc</sub> /cm <sup>3</sup> | 1.477                                            |
| μ/mm <sup>-1</sup>                 | 1.994                                            |
| F(000)                             | 952.0                                            |



|                                                  |                                                               |
|--------------------------------------------------|---------------------------------------------------------------|
| Crystal size/mm <sup>3</sup>                     | 0.18 × 0.15 × 0.12                                            |
| Radiation                                        | MoK $\alpha$ ( $\lambda = 0.71073$ )                          |
| 2 $\Theta$ range for data collection/ $^{\circ}$ | 6.968 to 52.042                                               |
| Index ranges                                     | $-12 \leq h \leq 7, -13 \leq k \leq 7, -23 \leq l \leq 23$    |
| Reflections collected                            | 6822                                                          |
| Independent reflections                          | 4113 [ $R_{\text{int}} = 0.0355, R_{\text{sigma}} = 0.0754$ ] |
| Data/restraints/parameters                       | 4113/0/271                                                    |
| Goodness-of-fit on $F^2$                         | 1.038                                                         |
| Final R indexes [ $I \geq 2\sigma(I)$ ]          | $R_1 = 0.0486, wR_2 = 0.0865$                                 |
| Final R indexes [all data]                       | $R_1 = 0.0740, wR_2 = 0.0975$                                 |
| Largest diff. peak/hole / e $\text{\AA}^{-3}$    | 0.39/-0.49                                                    |
| Flack parameter                                  | -0.004(8)                                                     |

## 12. Single crystal data, structural refinement and measurement of 4f

4f (CCDC Number: 2011408)

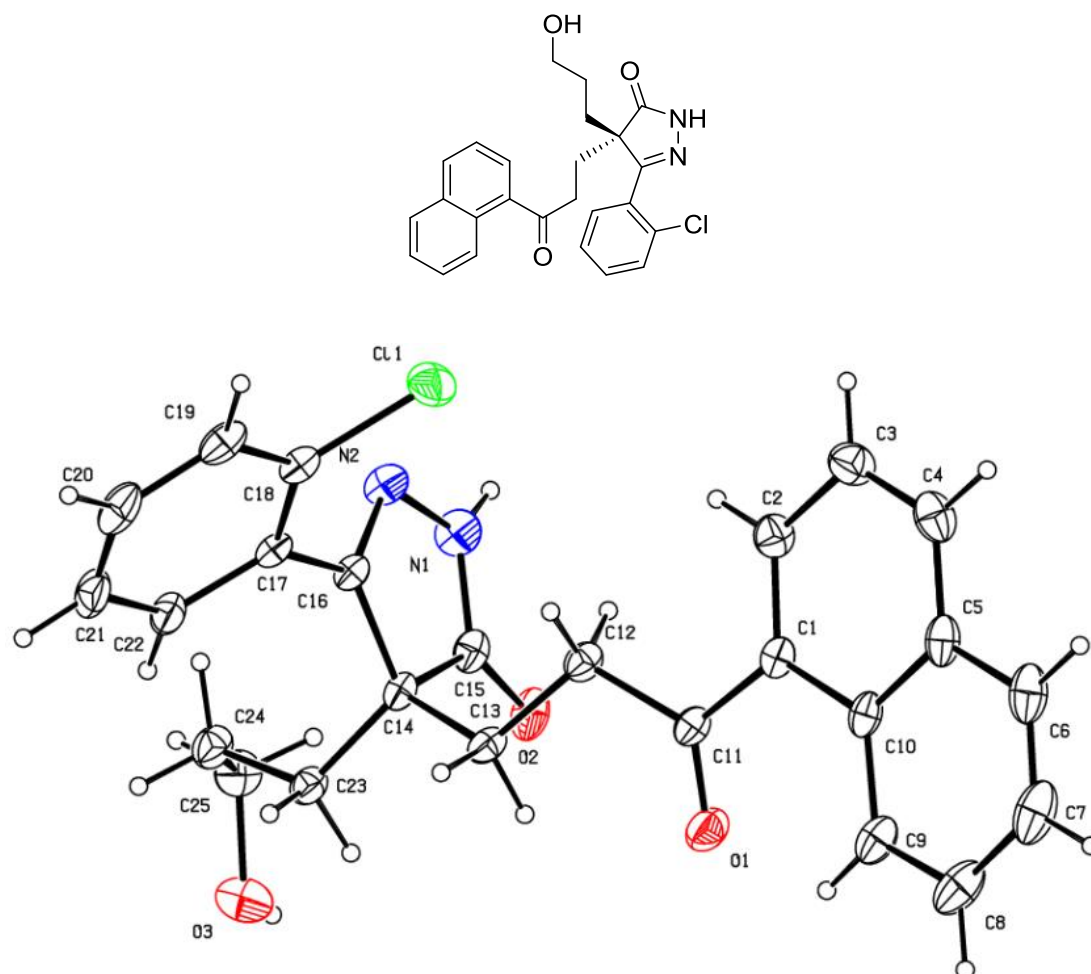

**Table 1** Crystal data and structure refinement for xuy1\_0218.

|                                  |                                                                 |
|----------------------------------|-----------------------------------------------------------------|
| Identification code              | xuy1_0218                                                       |
| Empirical formula                | C <sub>25</sub> H <sub>23</sub> ClN <sub>2</sub> O <sub>3</sub> |
| Formula weight                   | 434.90                                                          |
| Temperature/K                    | 293.44(10)                                                      |
| Crystal system                   | orthorhombic                                                    |
| Space group                      | P2 <sub>1</sub> 2 <sub>1</sub> 2 <sub>1</sub>                   |
| a/Å                              | 7.04410(19)                                                     |
| b/Å                              | 16.2447(4)                                                      |
| c/Å                              | 18.7200(5)                                                      |
| $\alpha$ /°                      | 90.00                                                           |
| $\beta$ /°                       | 90.00                                                           |
| $\gamma$ /°                      | 90.00                                                           |
| Volume/Å <sup>3</sup>            | 2142.11(9)                                                      |
| Z                                | 4                                                               |
| $\rho_{\text{calc}}/\text{cm}^3$ | 1.349                                                           |

|                                                |                                                               |
|------------------------------------------------|---------------------------------------------------------------|
| $\mu/\text{mm}^{-1}$                           | 1.823                                                         |
| F(000)                                         | 912.0                                                         |
| Crystal size/ $\text{mm}^3$                    | $0.12 \times 0.07 \times 0.06$                                |
| Radiation                                      | $\text{CuK}\alpha$ ( $\lambda = 1.54184$ )                    |
| $2\theta$ range for data collection/ $^\circ$  | 7.2 to 133.12                                                 |
| Index ranges                                   | $-8 \leq h \leq 8, -10 \leq k \leq 19, -22 \leq l \leq 19$    |
| Reflections collected                          | 5081                                                          |
| Independent reflections                        | 3222 [ $R_{\text{int}} = 0.0228, R_{\text{sigma}} = 0.0436$ ] |
| Data/restraints/parameters                     | 3222/0/281                                                    |
| Goodness-of-fit on $F^2$                       | 1.038                                                         |
| Final R indexes [ $I \geq 2\sigma(I)$ ]        | $R_1 = 0.0416, wR_2 = 0.0957$                                 |
| Final R indexes [all data]                     | $R_1 = 0.0496, wR_2 = 0.1031$                                 |
| Largest diff. peak/hole / $e \text{ \AA}^{-3}$ | 0.18/-0.17                                                    |
| Flack parameter                                | -0.02(2)                                                      |



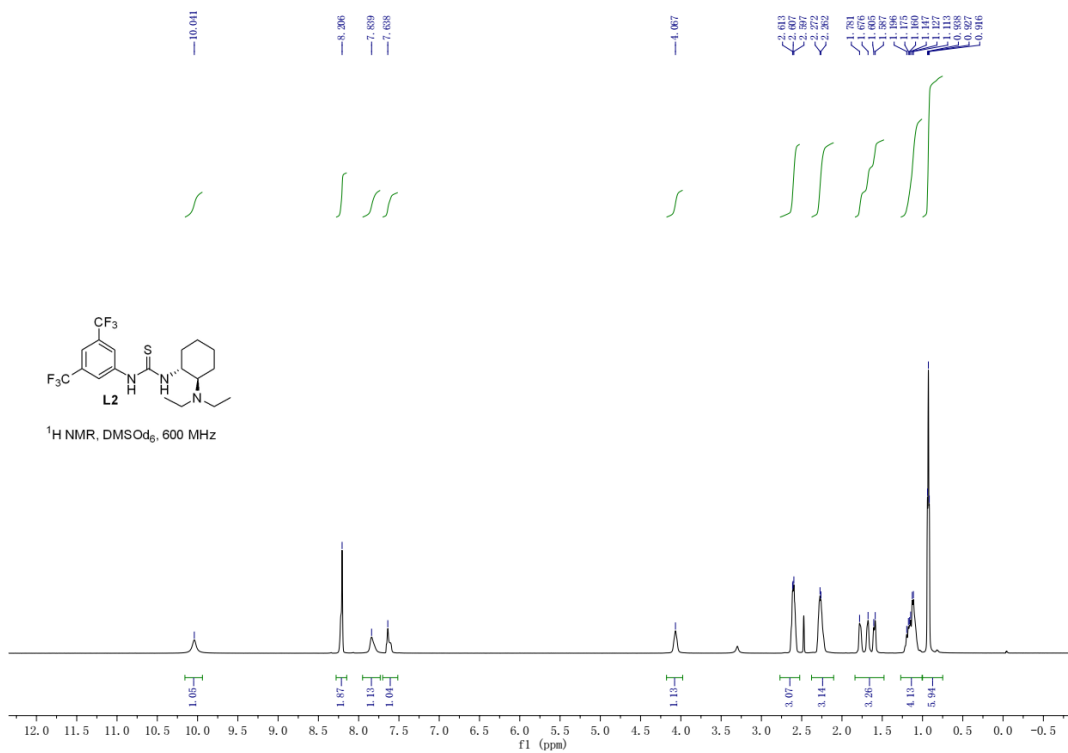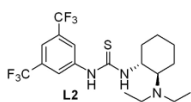

$^1\text{H NMR}$ ,  $\text{DMSO-d}_6$ , 600 MHz

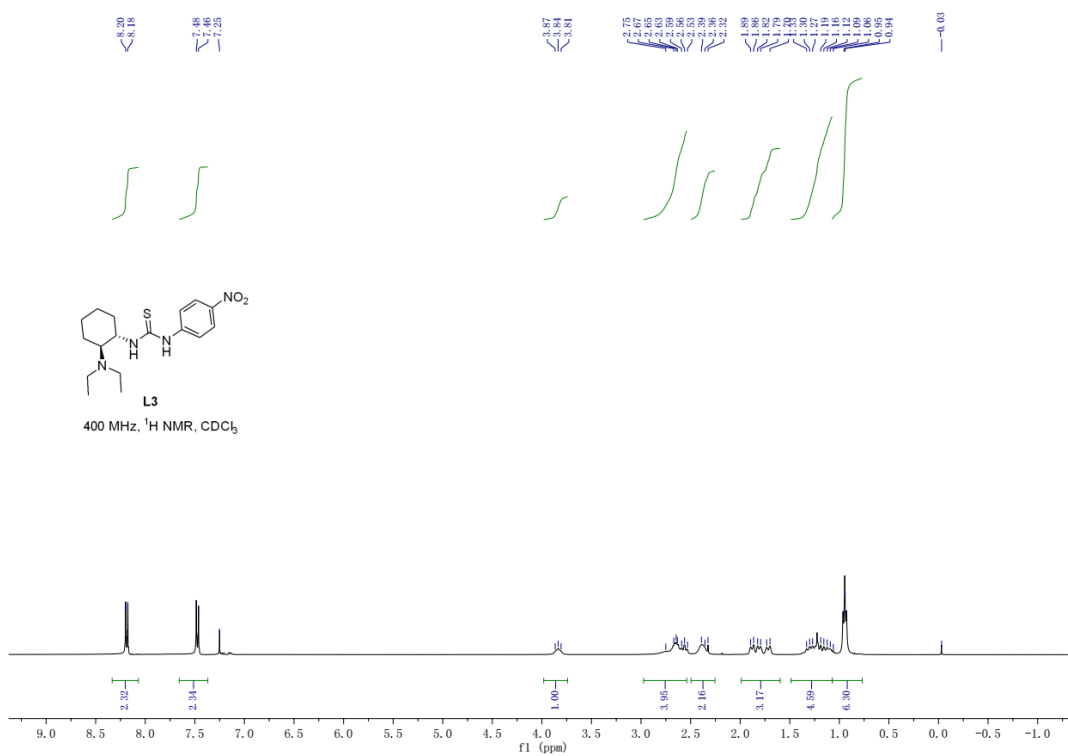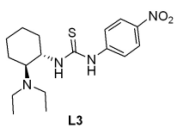

400 MHz,  $^1\text{H NMR}$ ,  $\text{CDCl}_3$



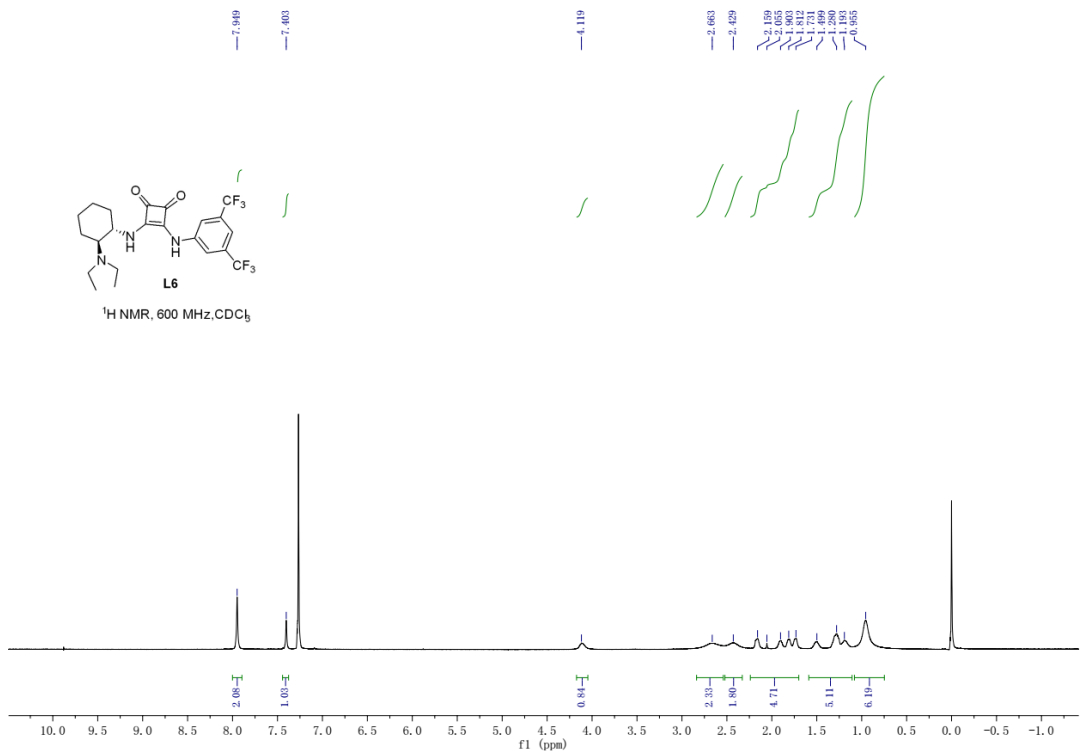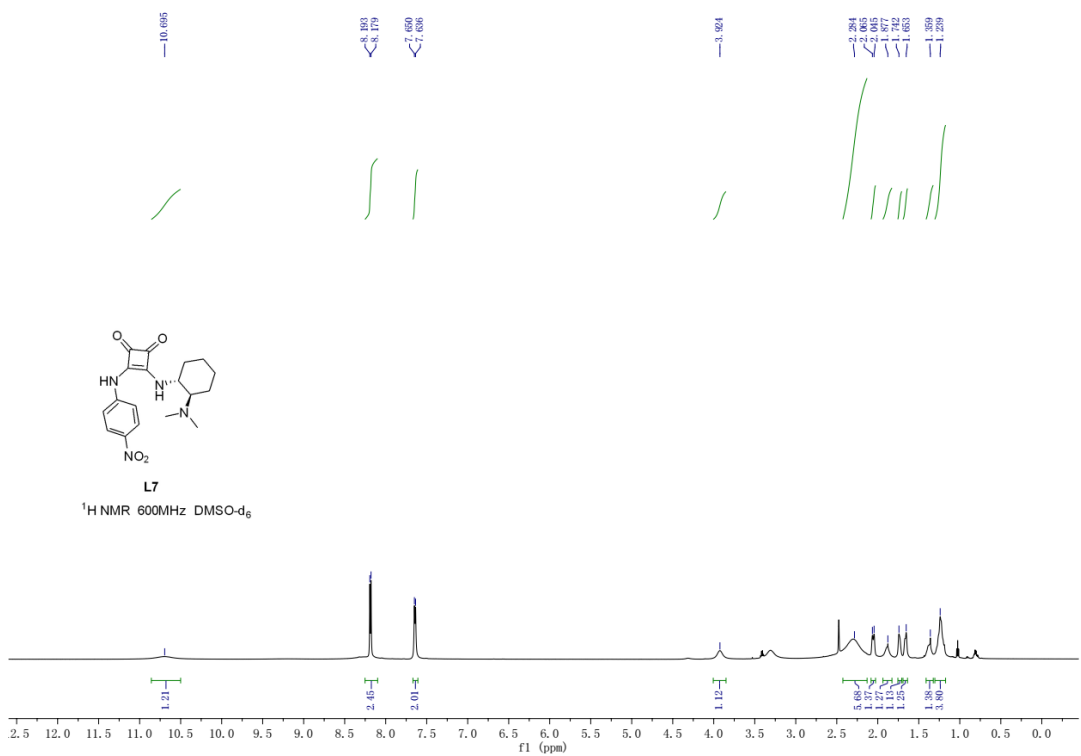





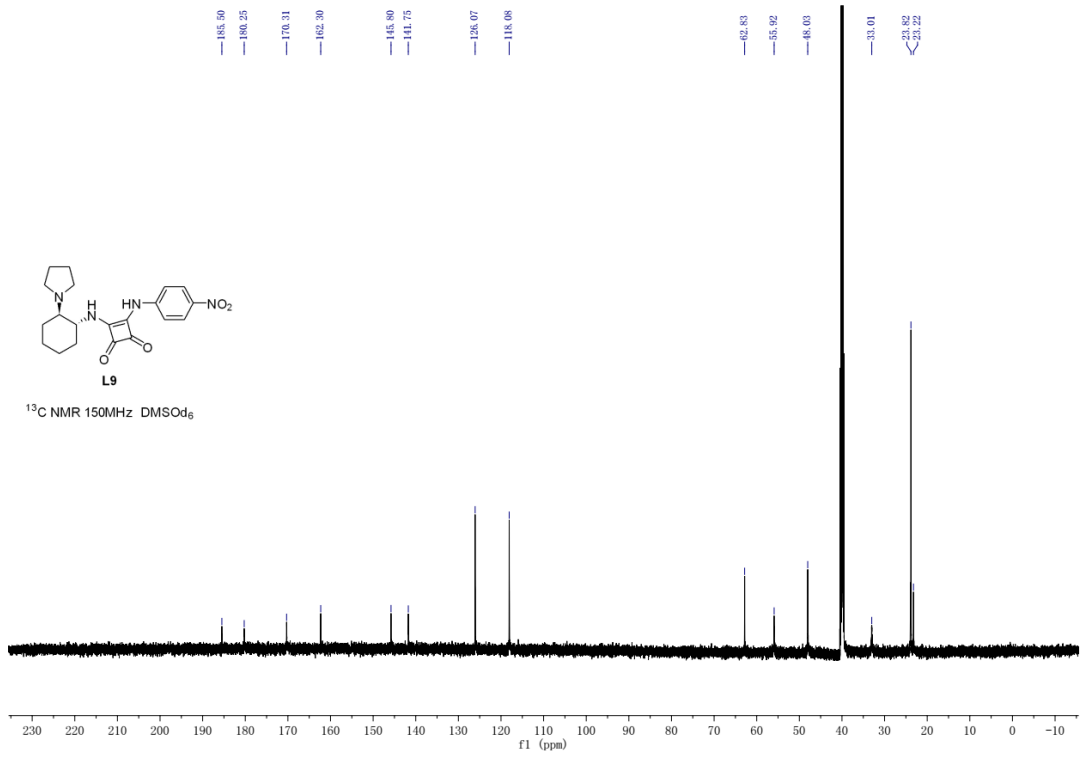

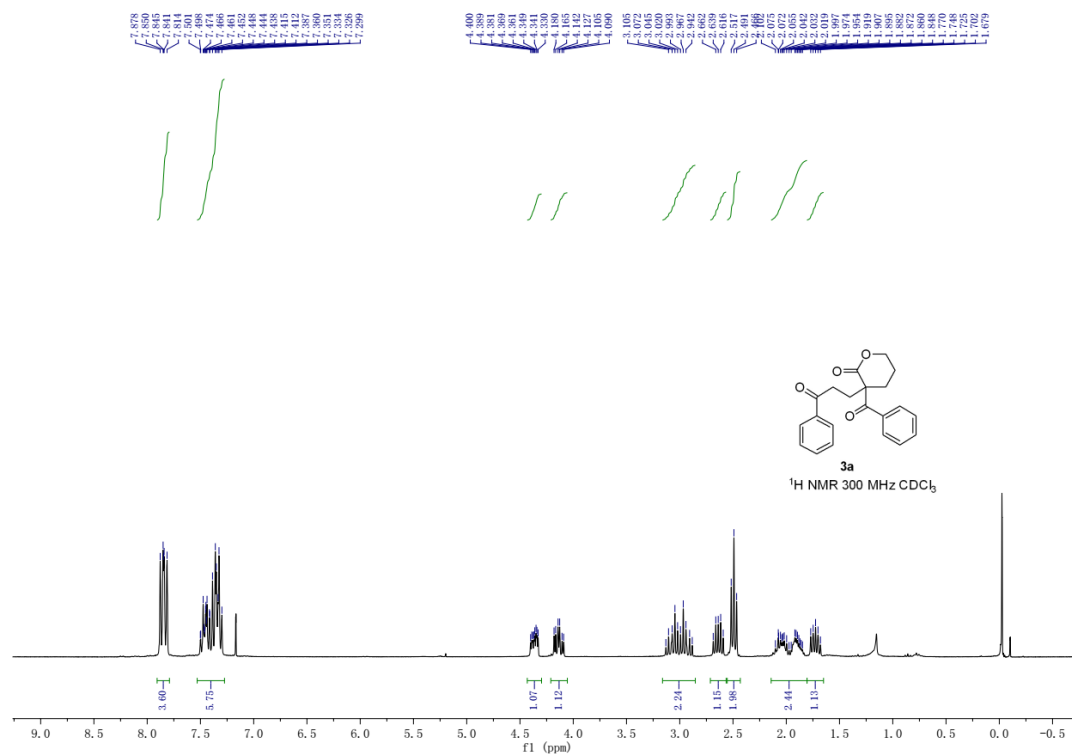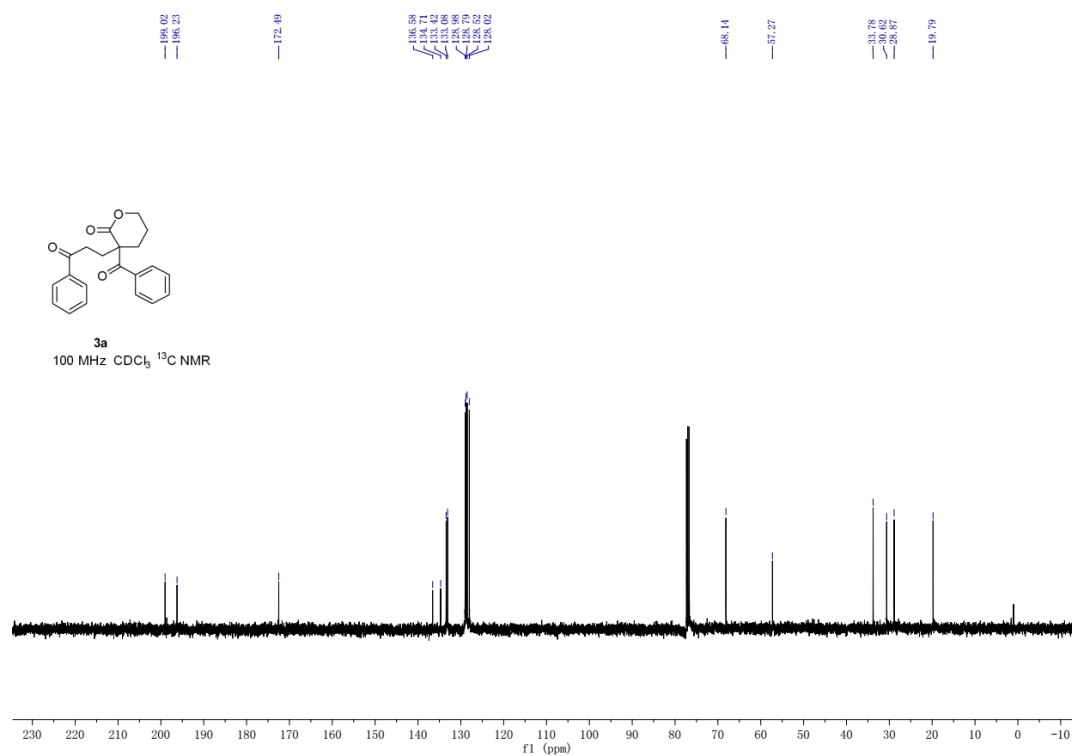

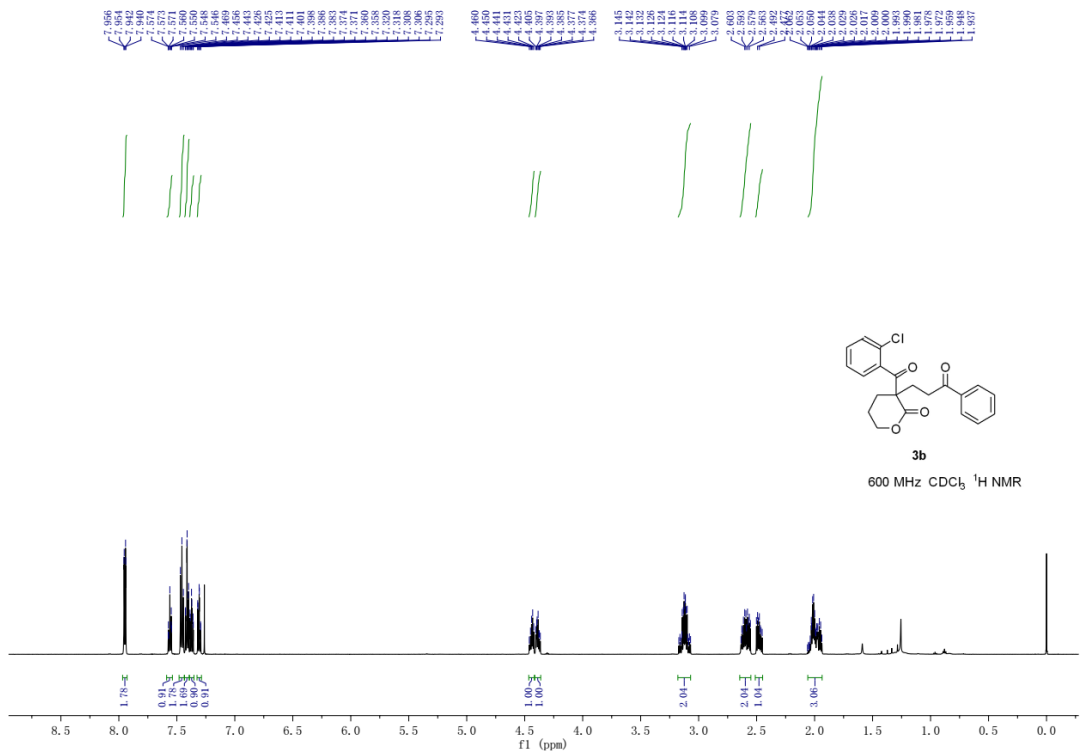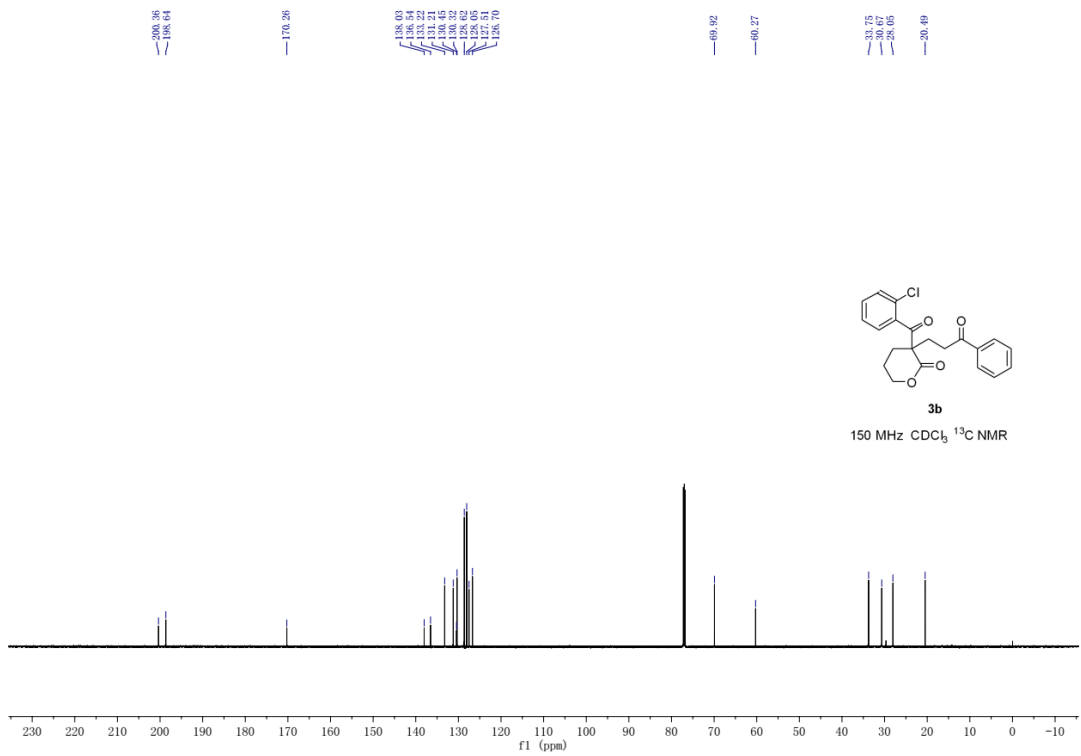

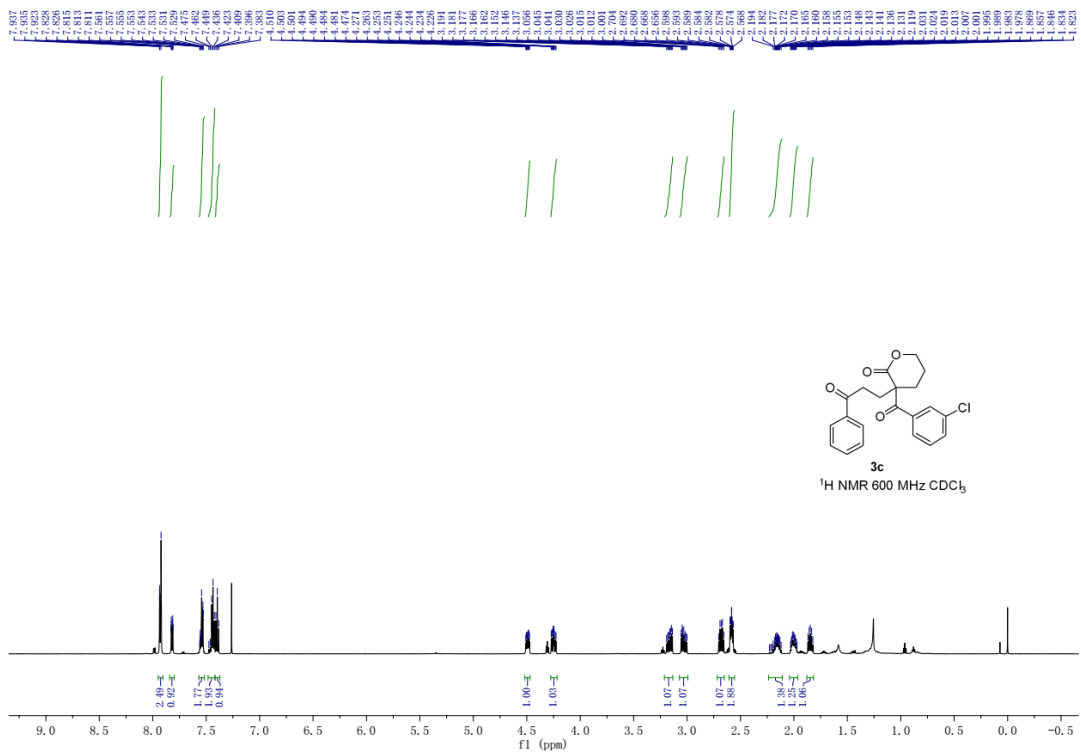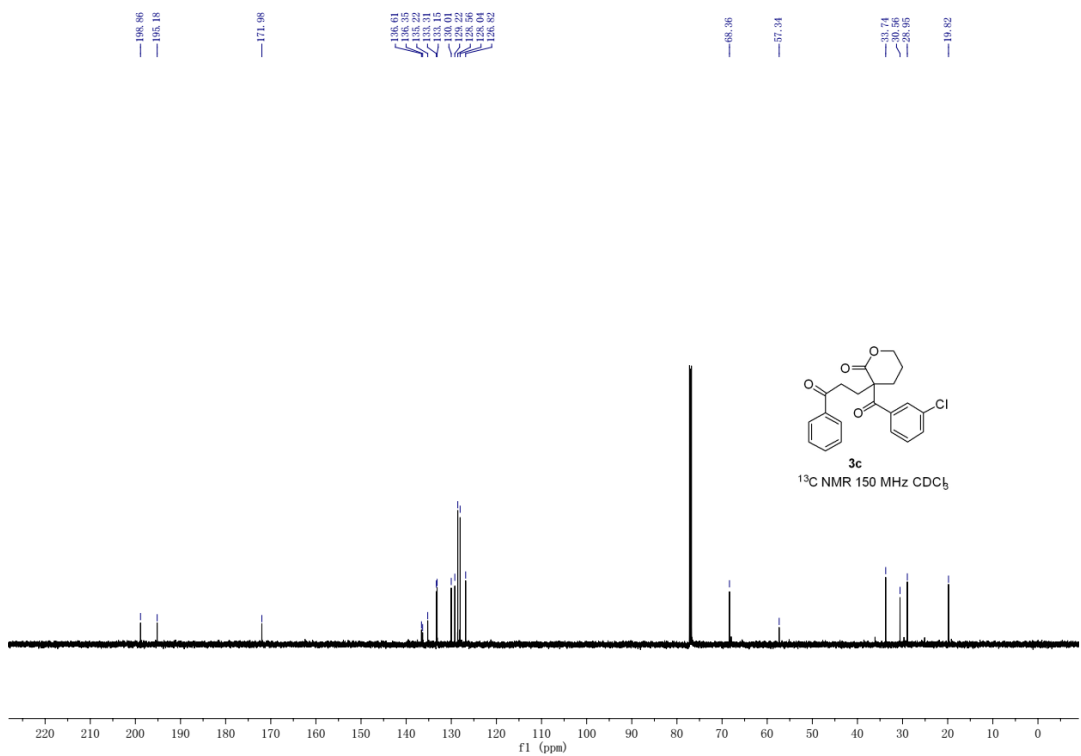

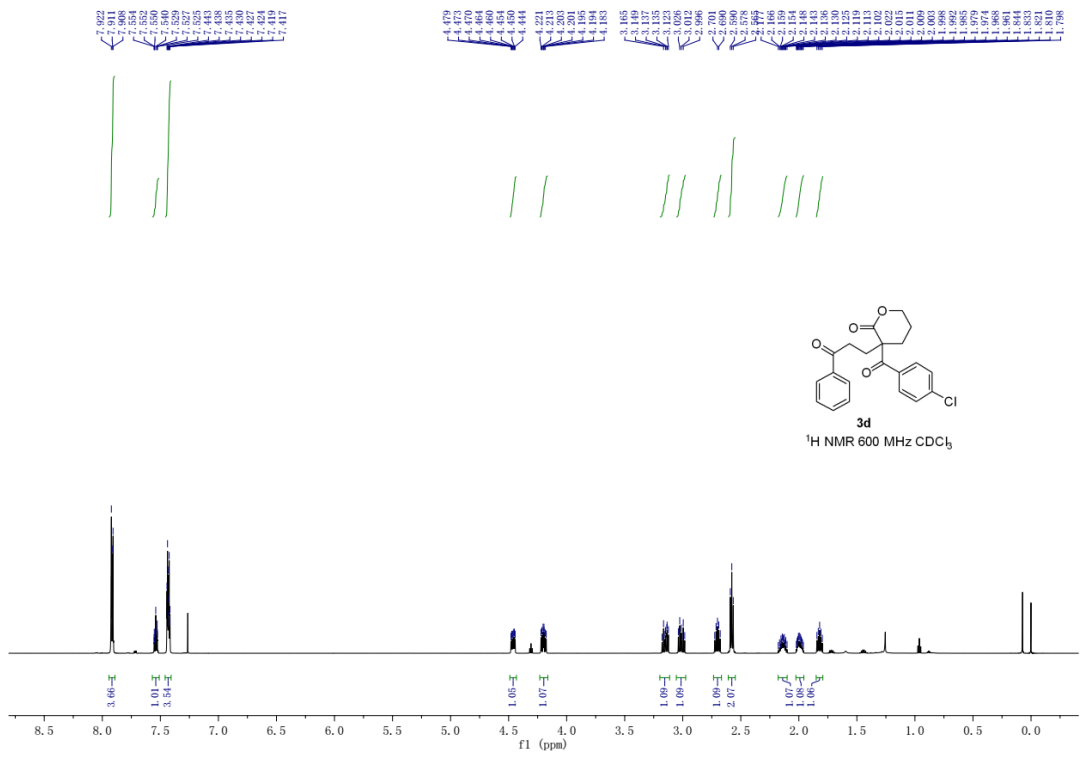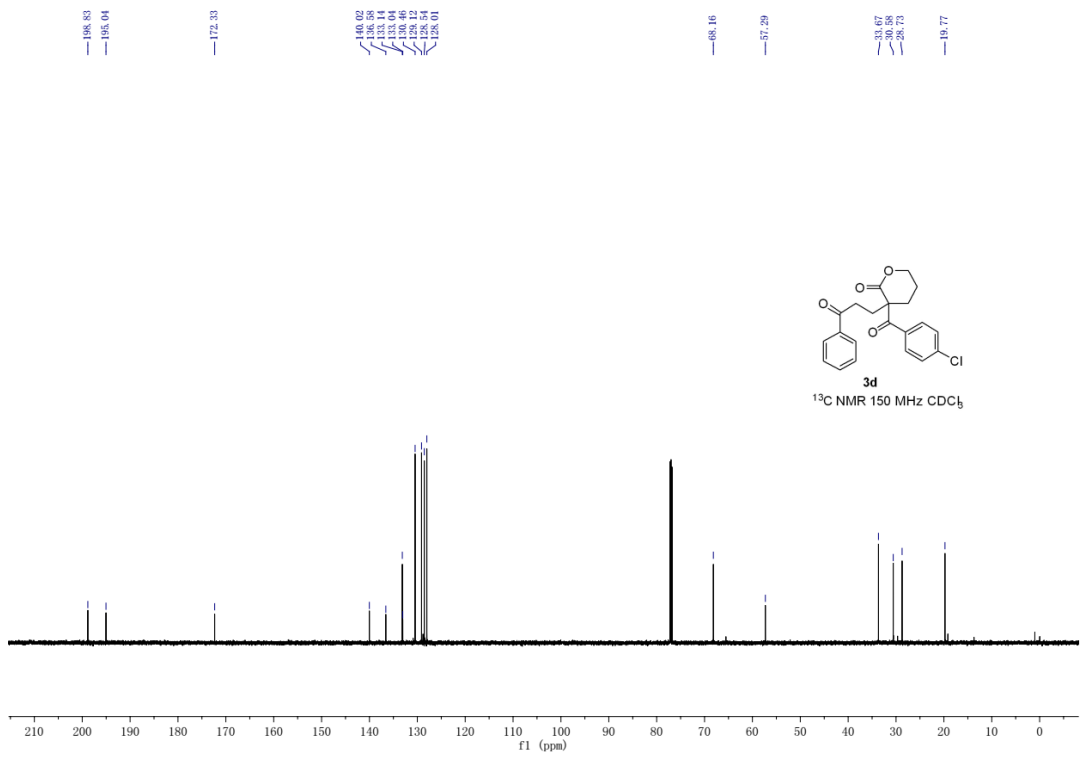



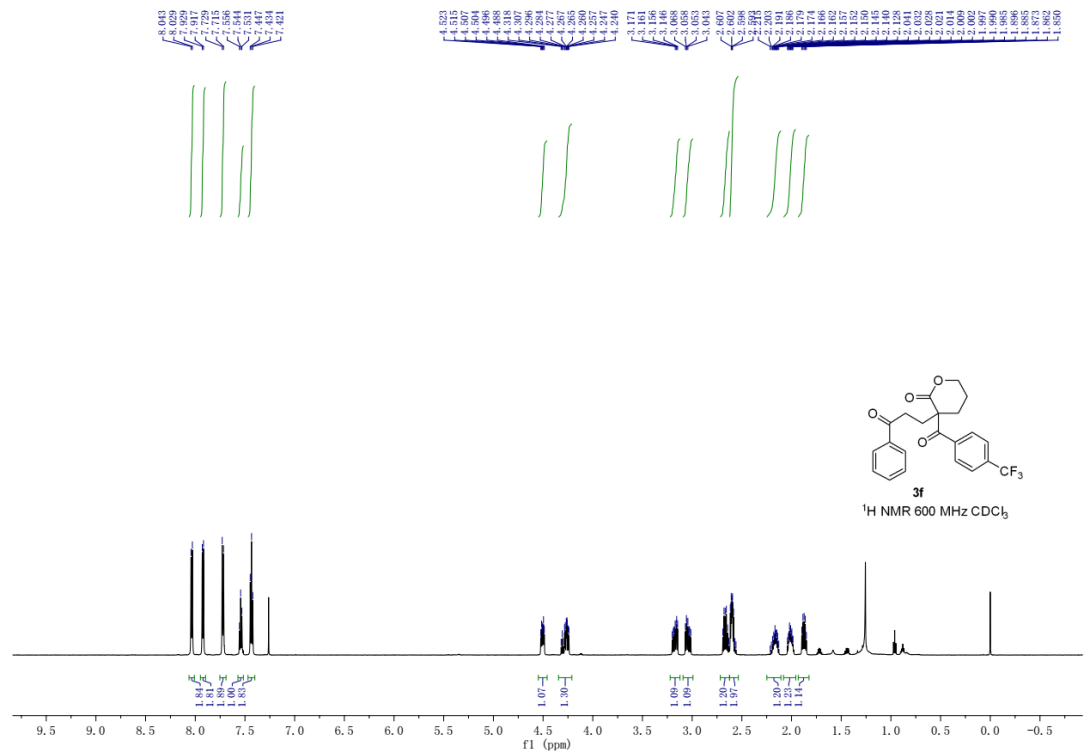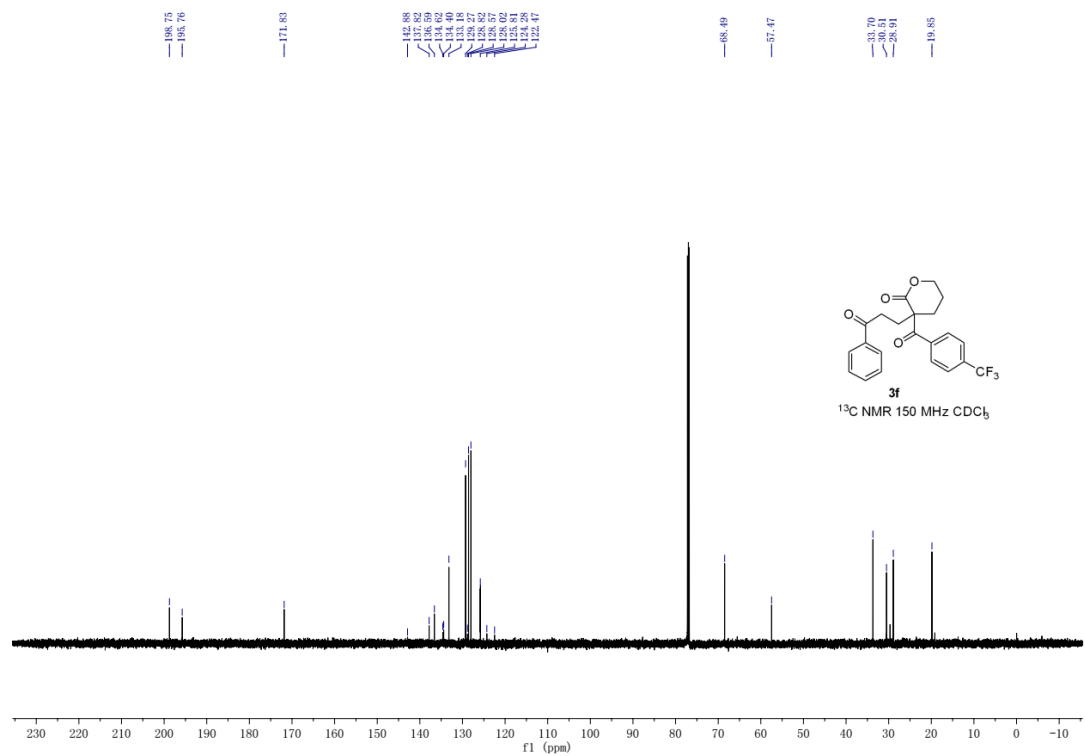





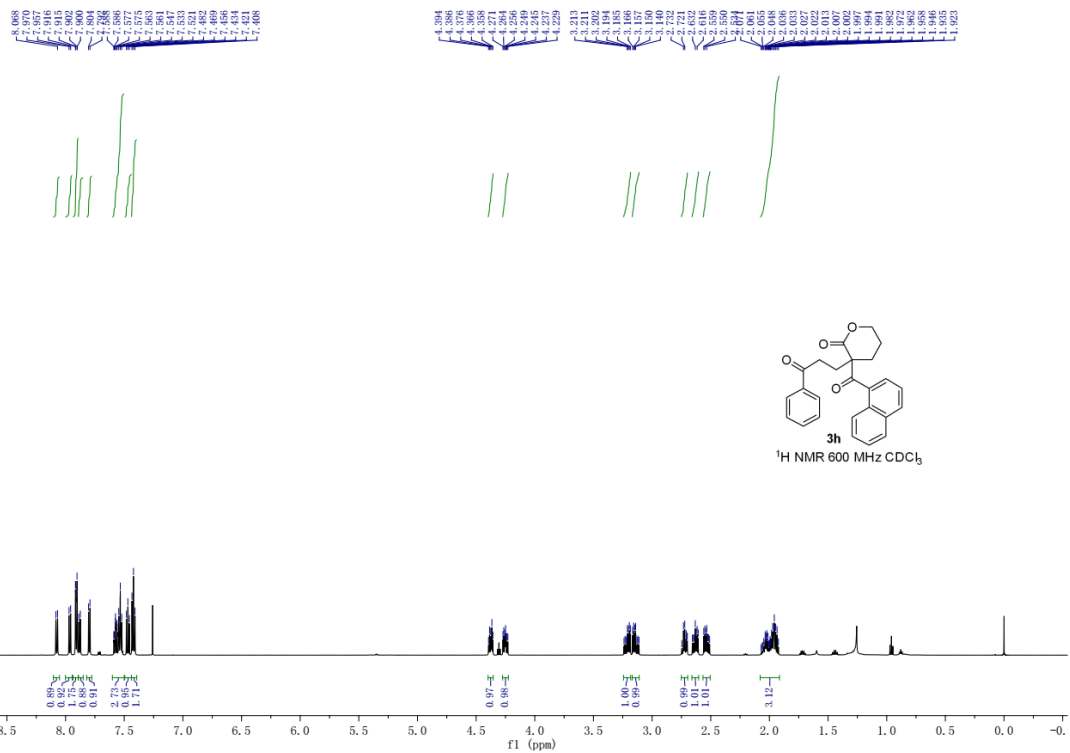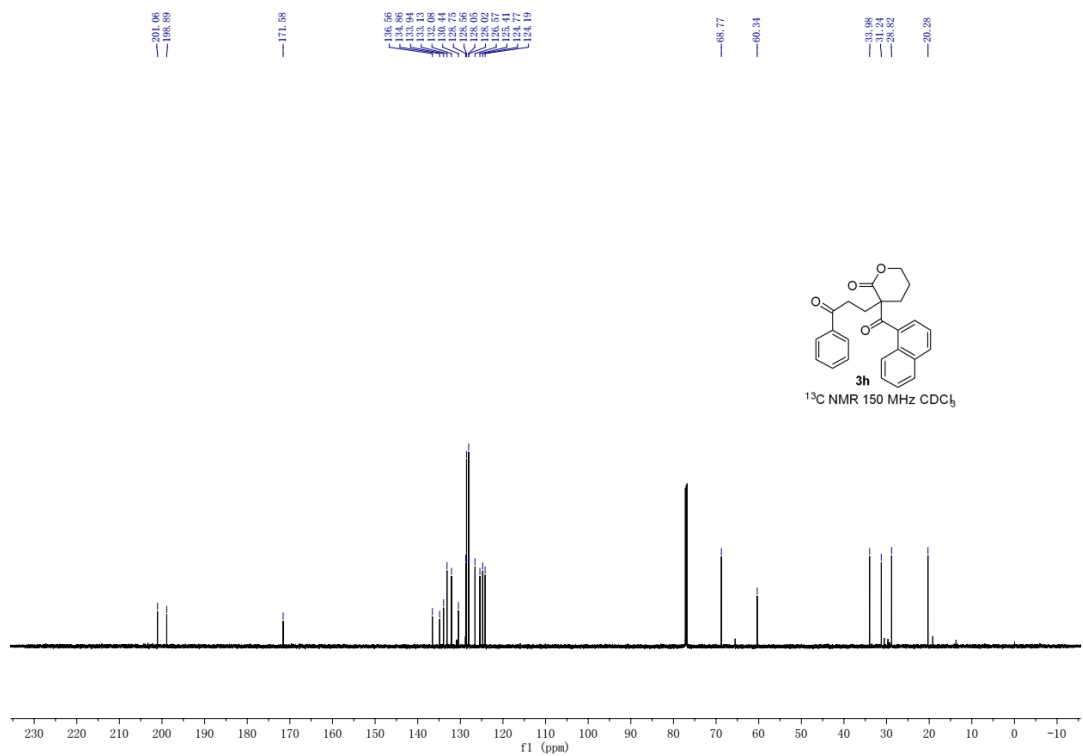





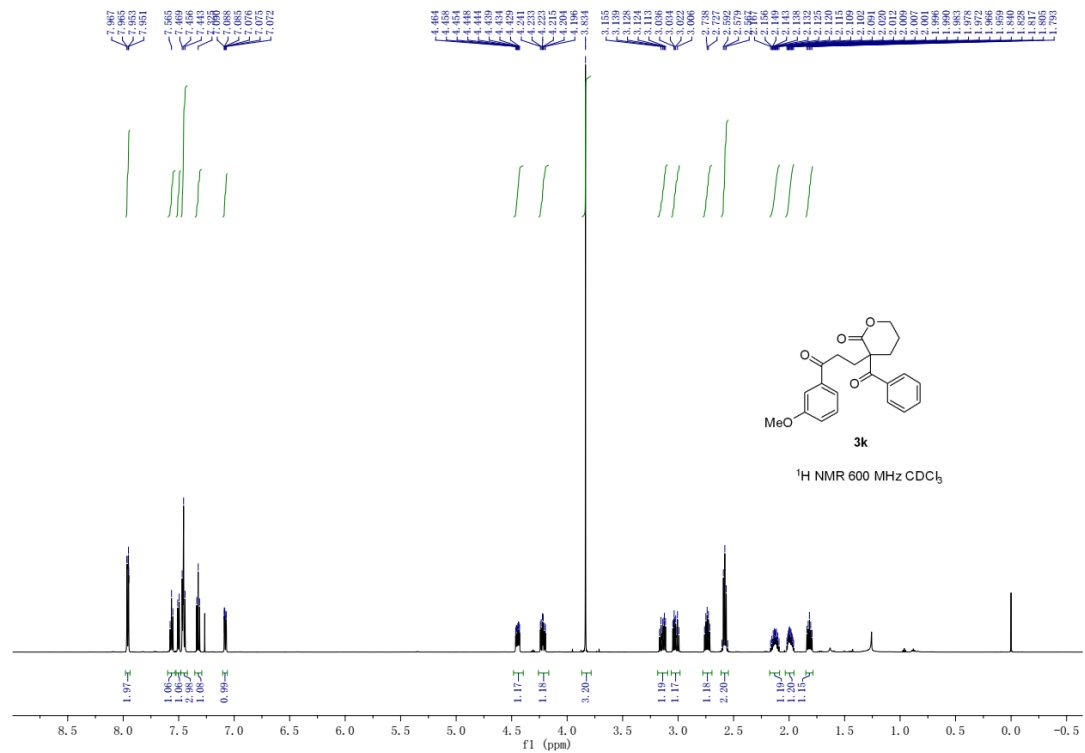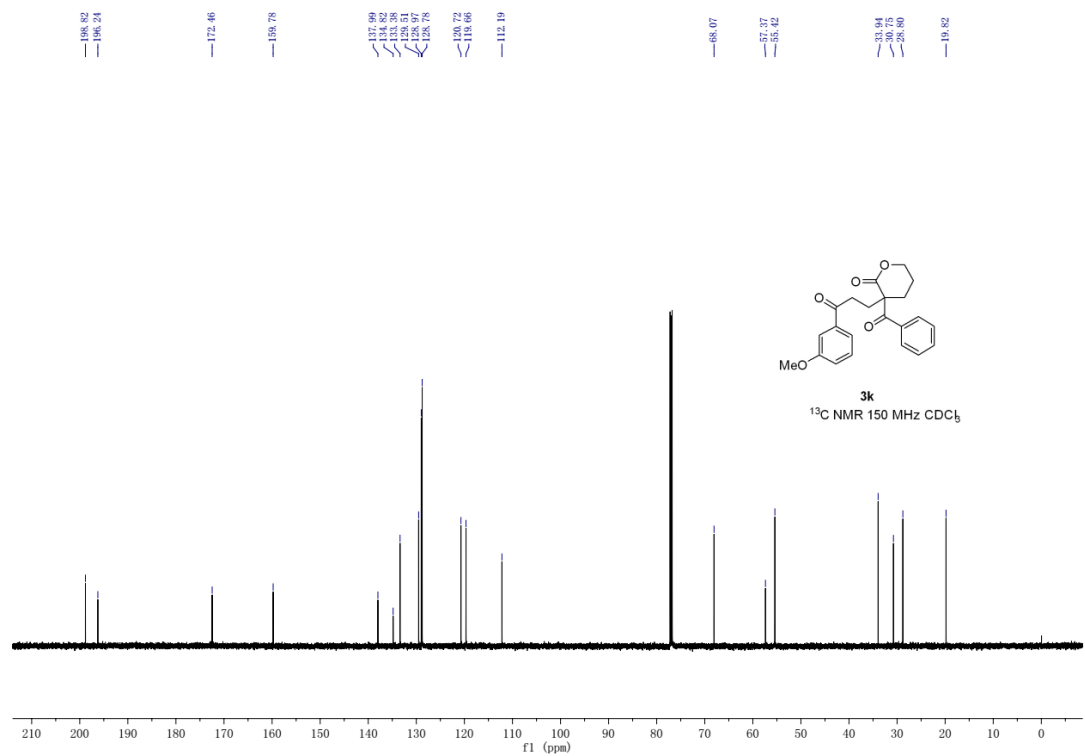

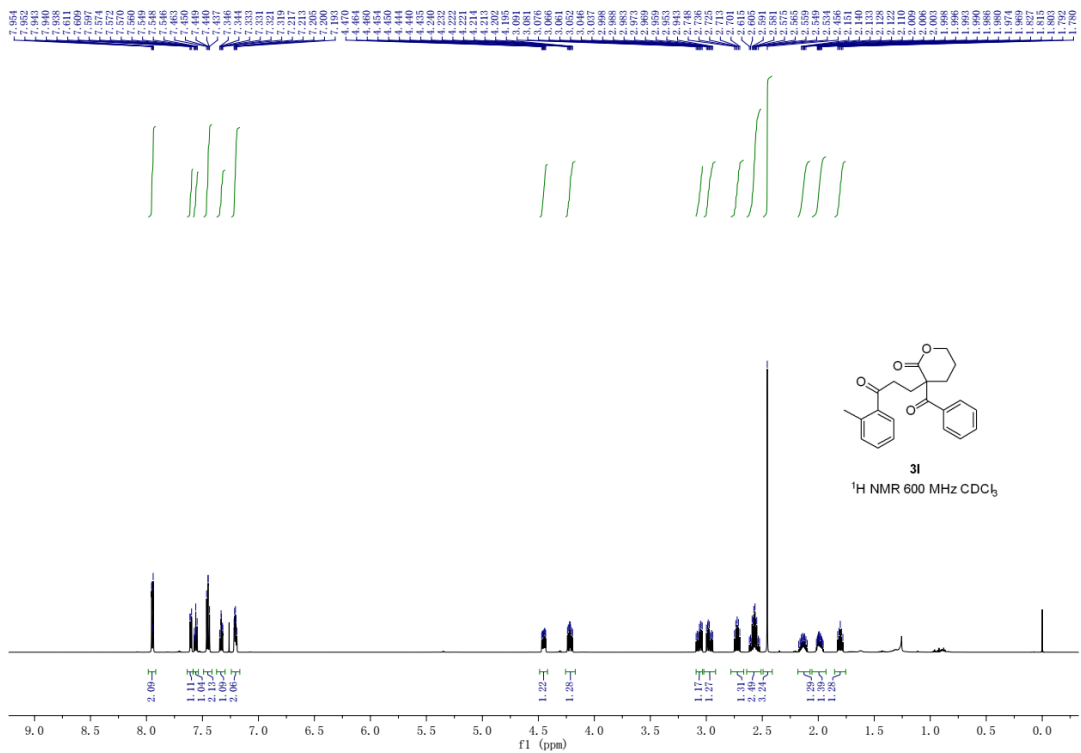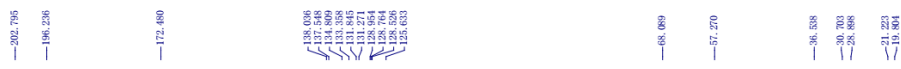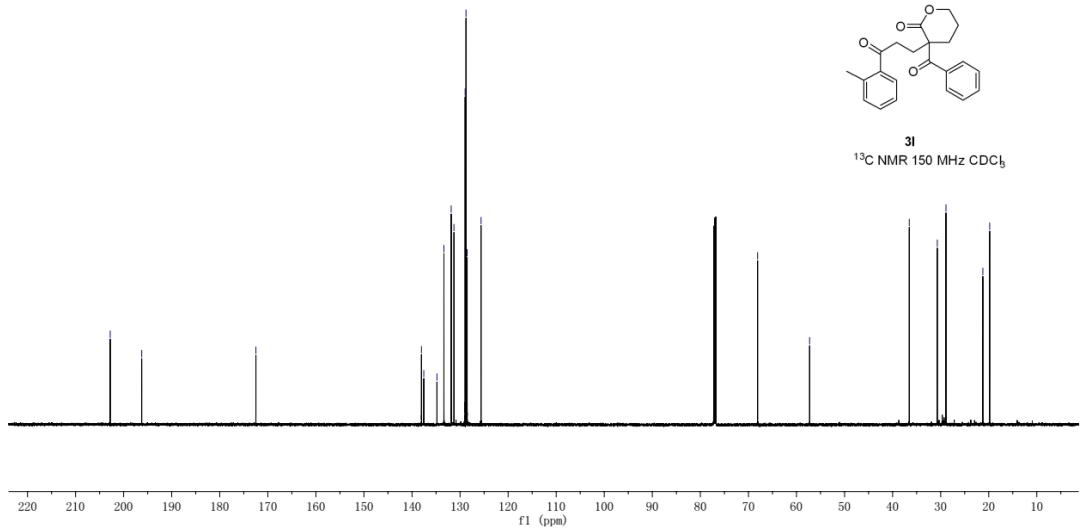

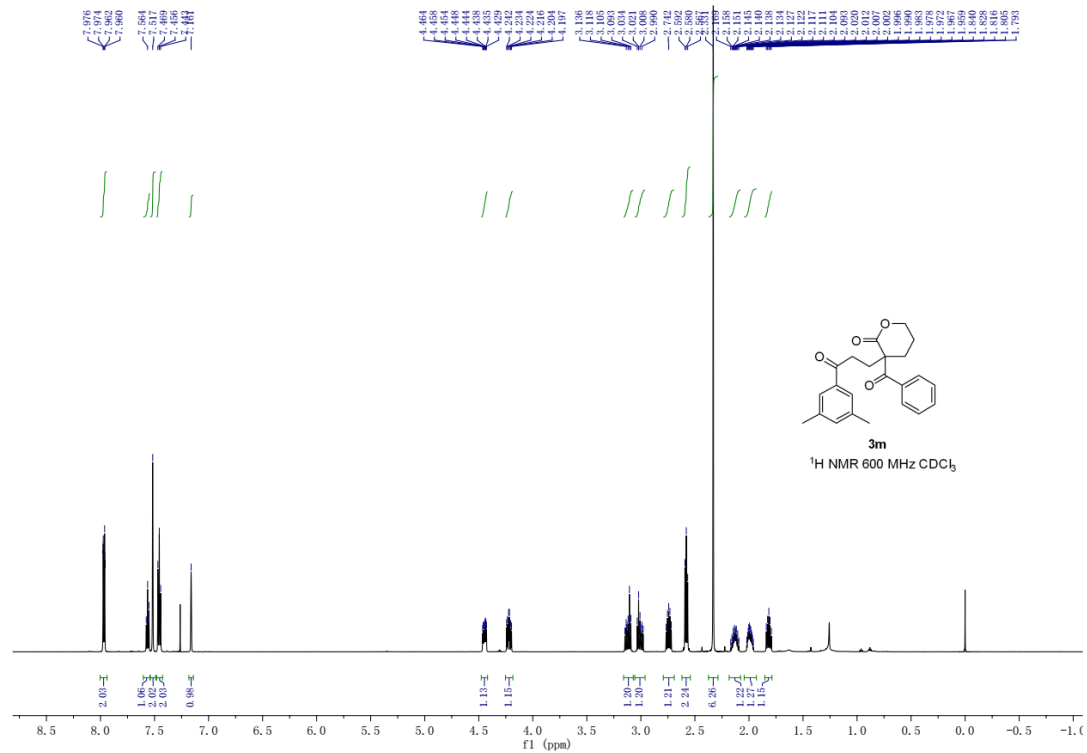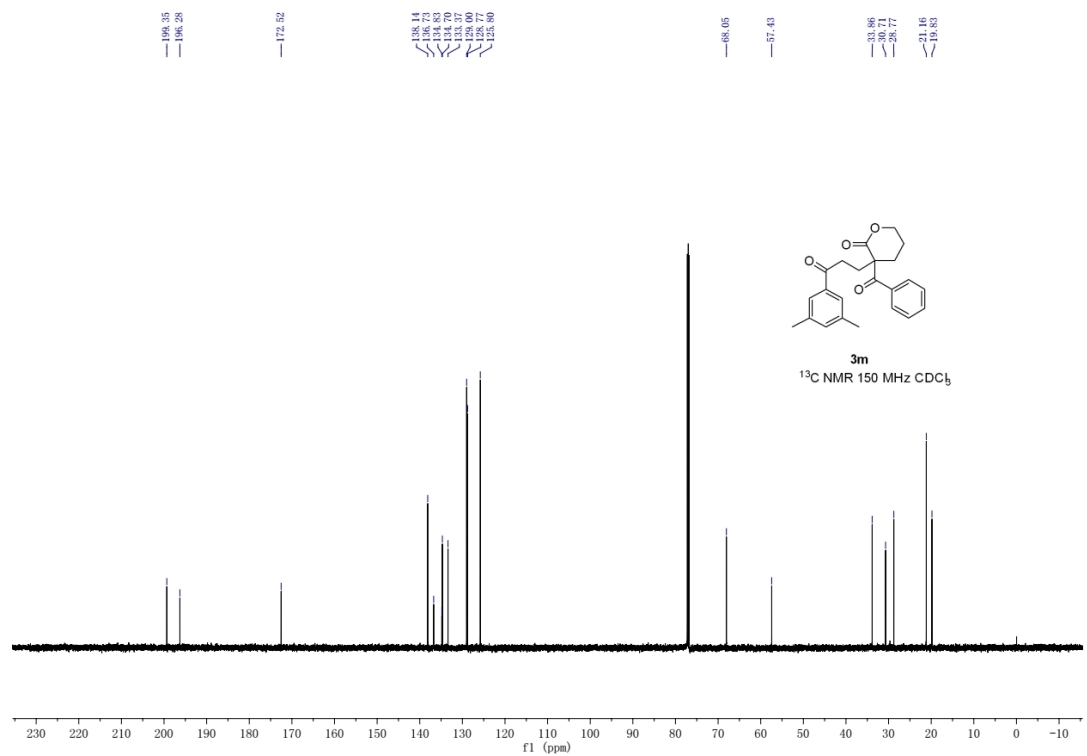

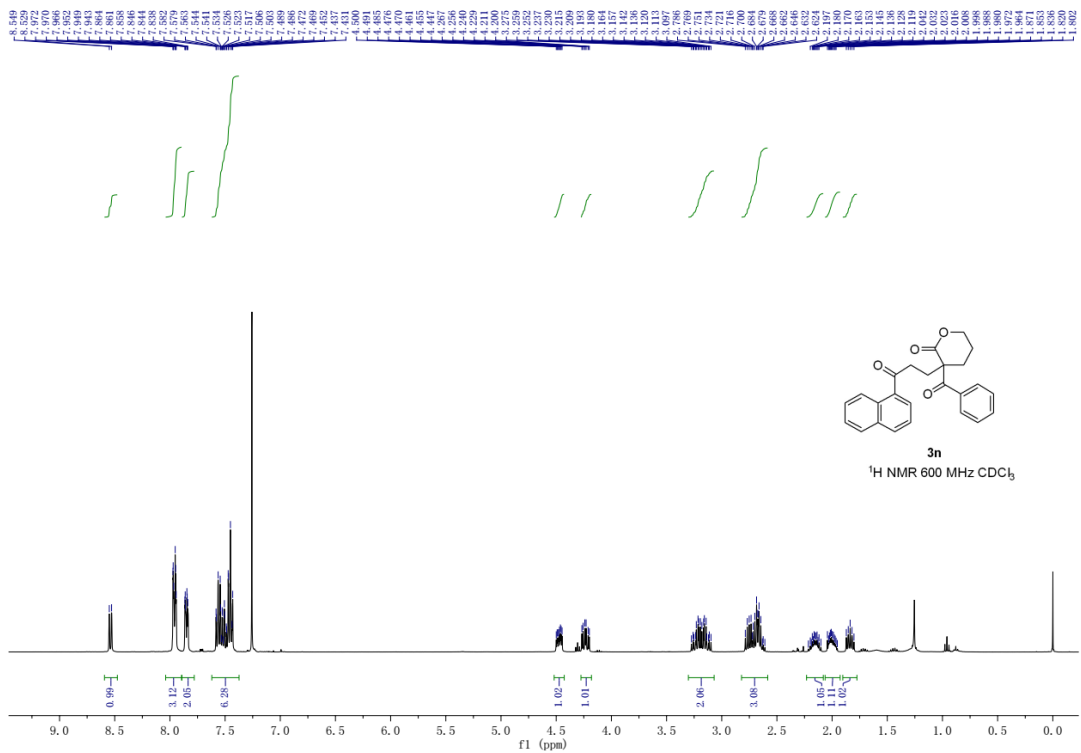

201.11  
 201.41  
 196.35  
 172.05  
 133.66  
 133.06  
 133.53  
 133.17  
 129.11  
 128.46  
 127.97  
 127.53  
 125.61  
 124.46

68.26  
 57.40  
 37.25  
 30.99  
 29.05  
 19.93

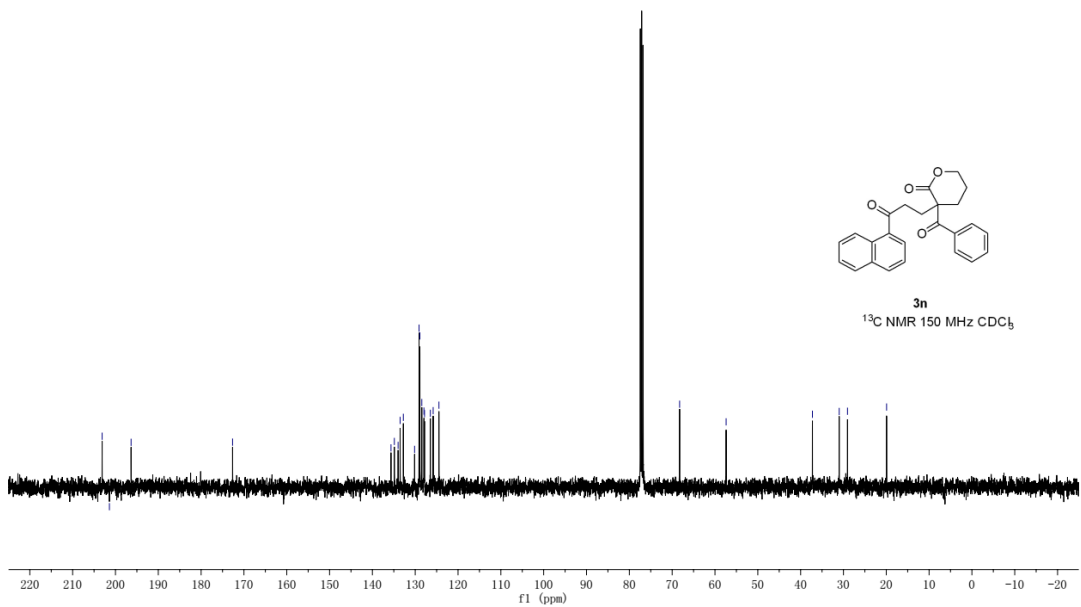

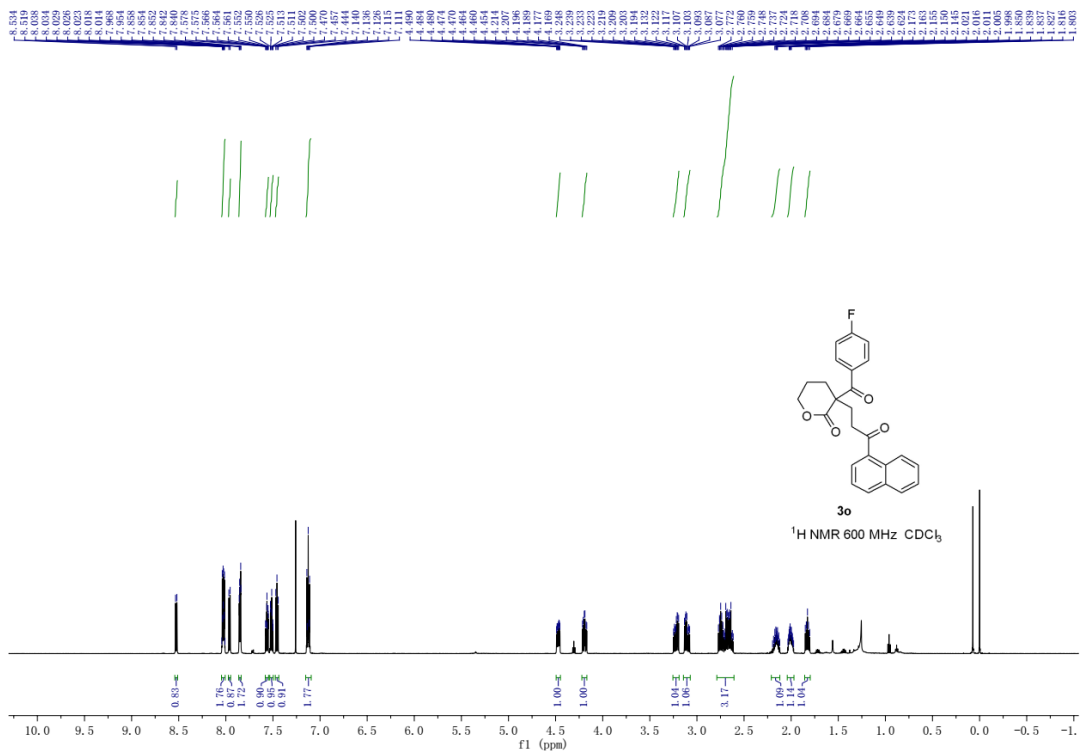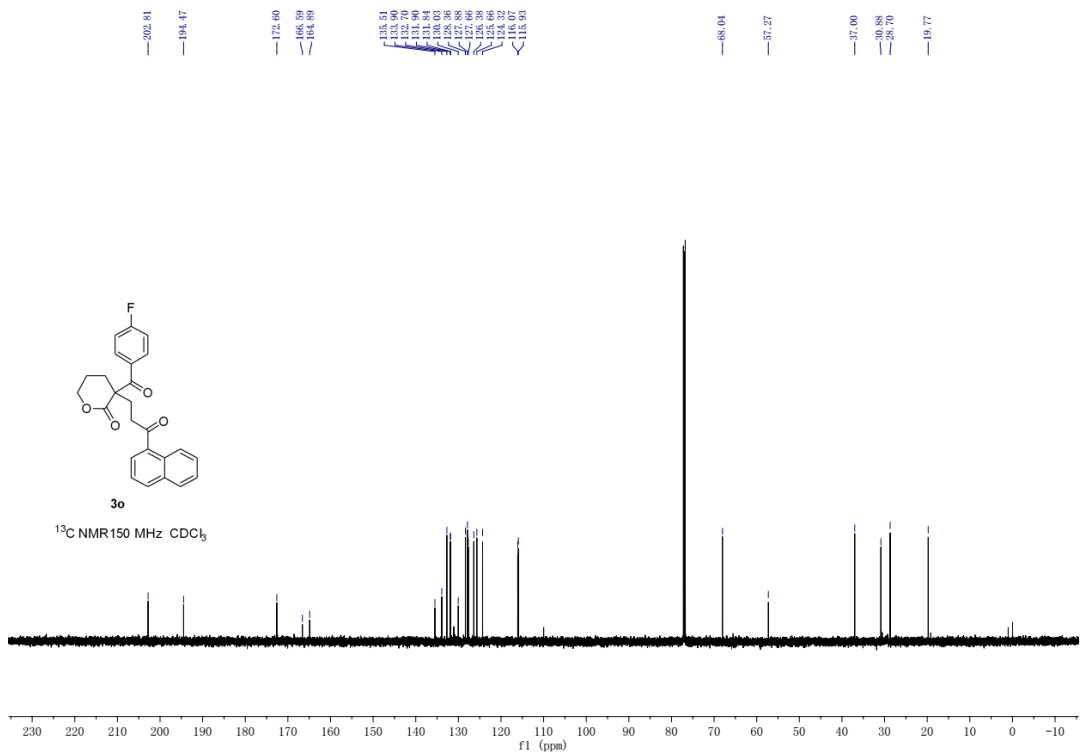



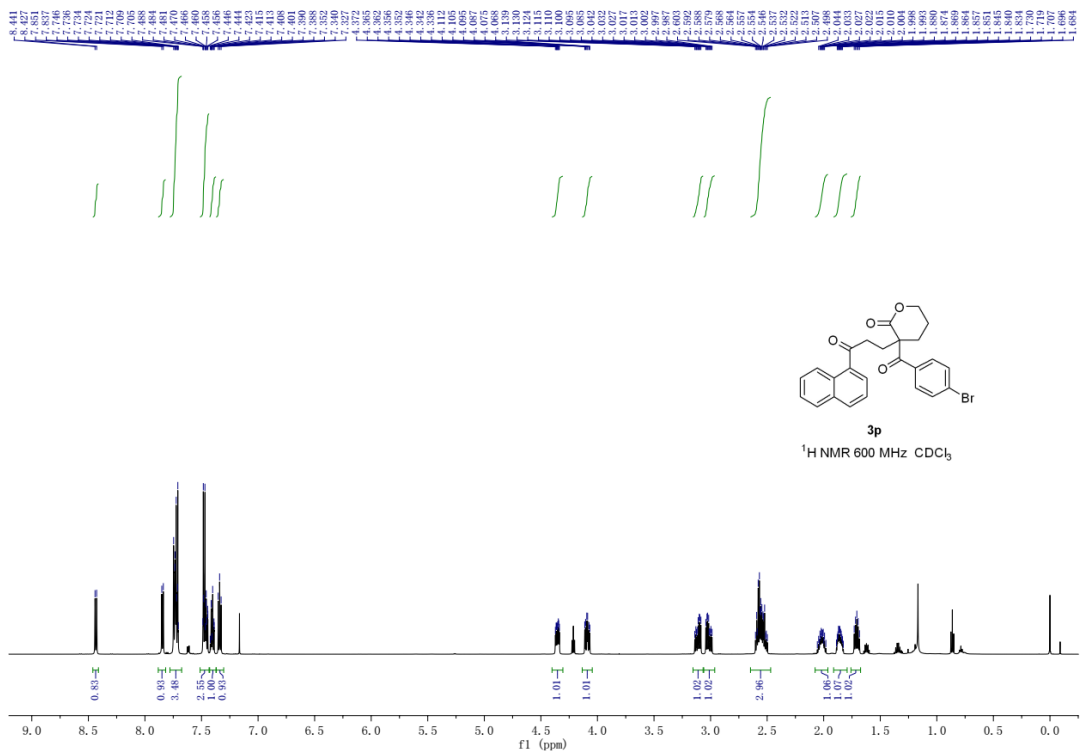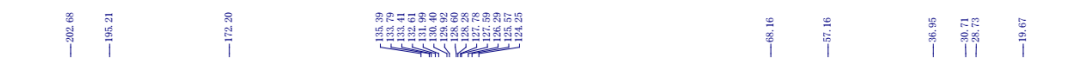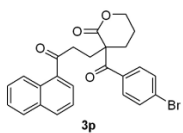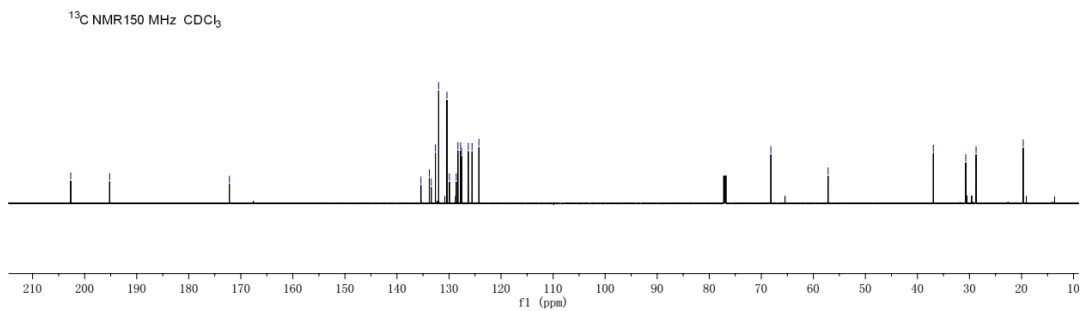







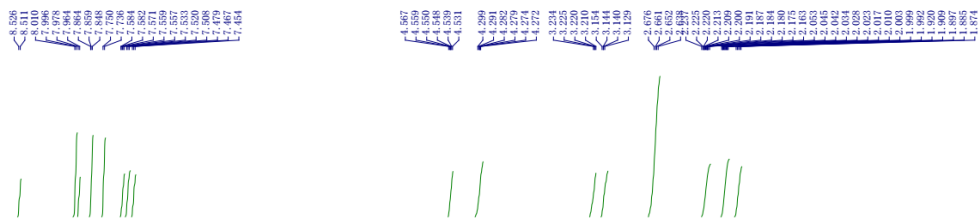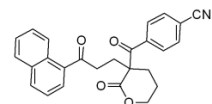

**3t**  
**<sup>1</sup>H NMR 600 MHz CDCl<sub>3</sub>**

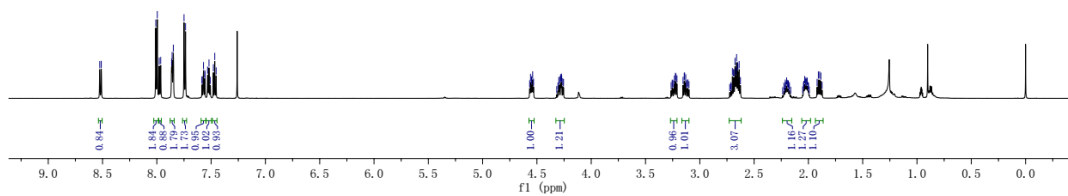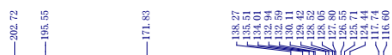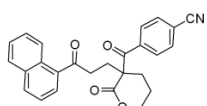

**3t**  
**<sup>13</sup>C NMR 150 MHz CDCl<sub>3</sub>**

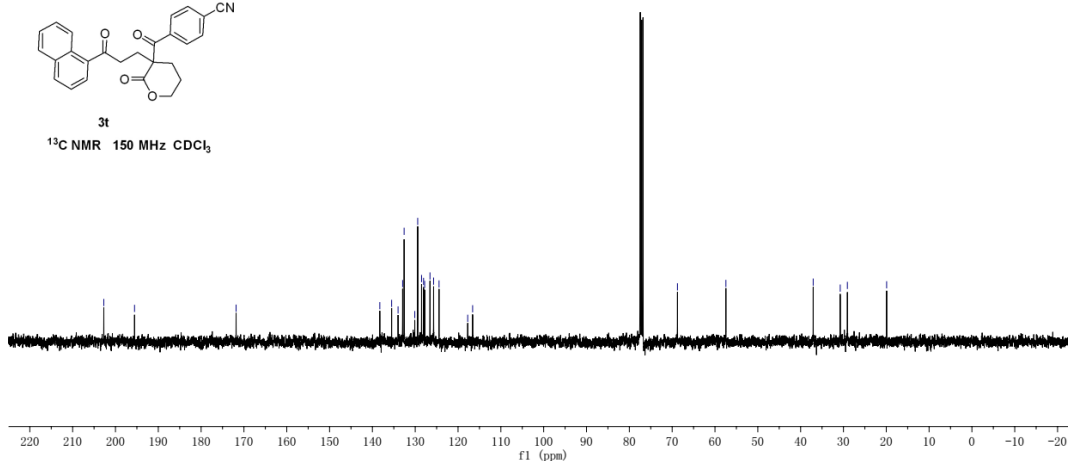

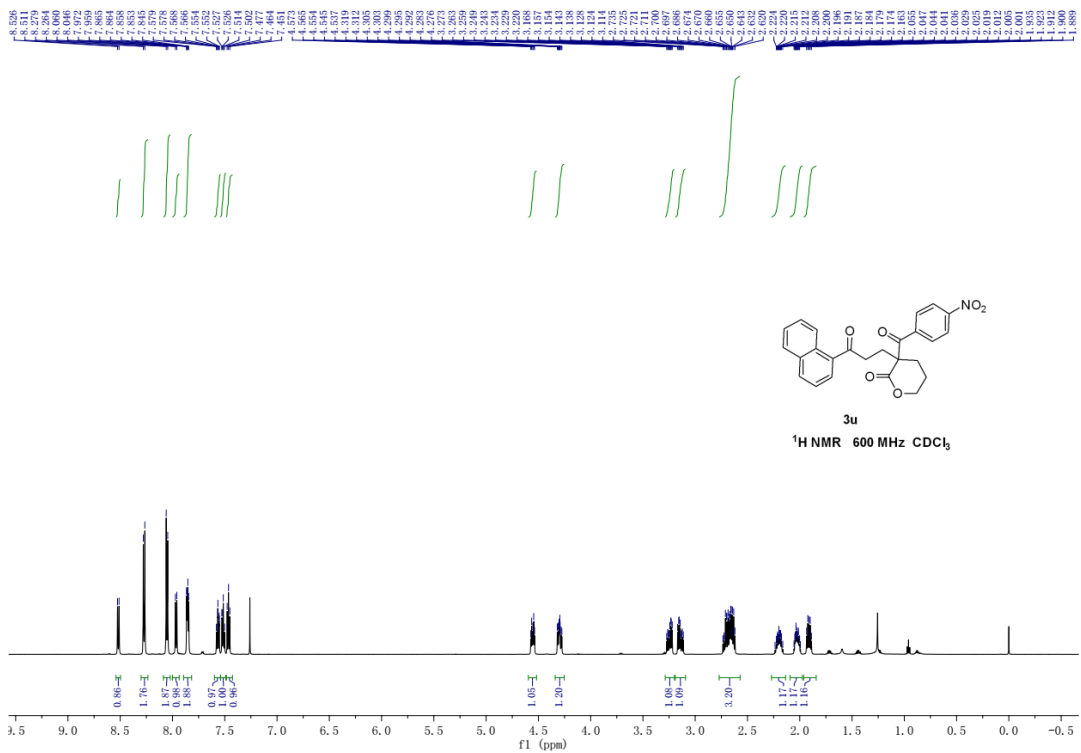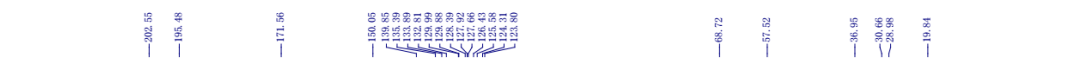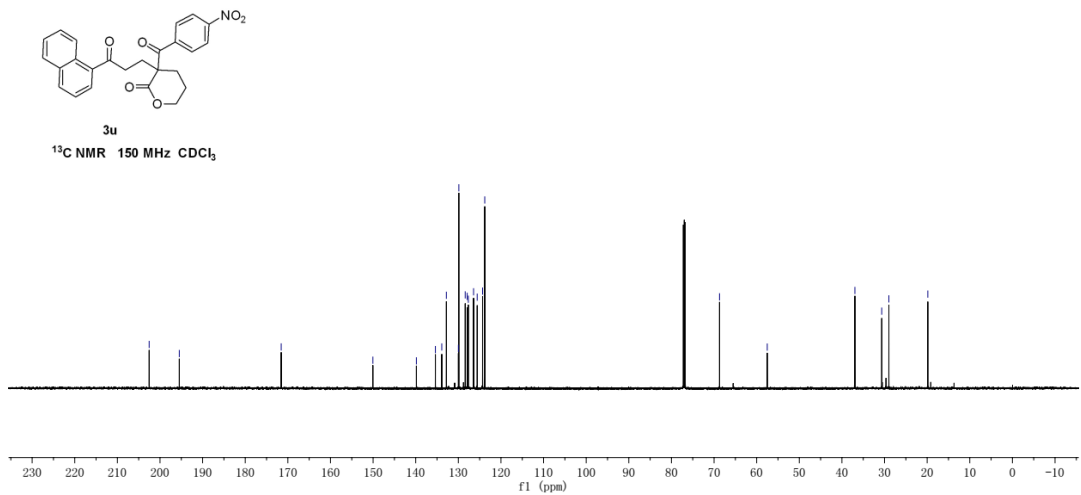

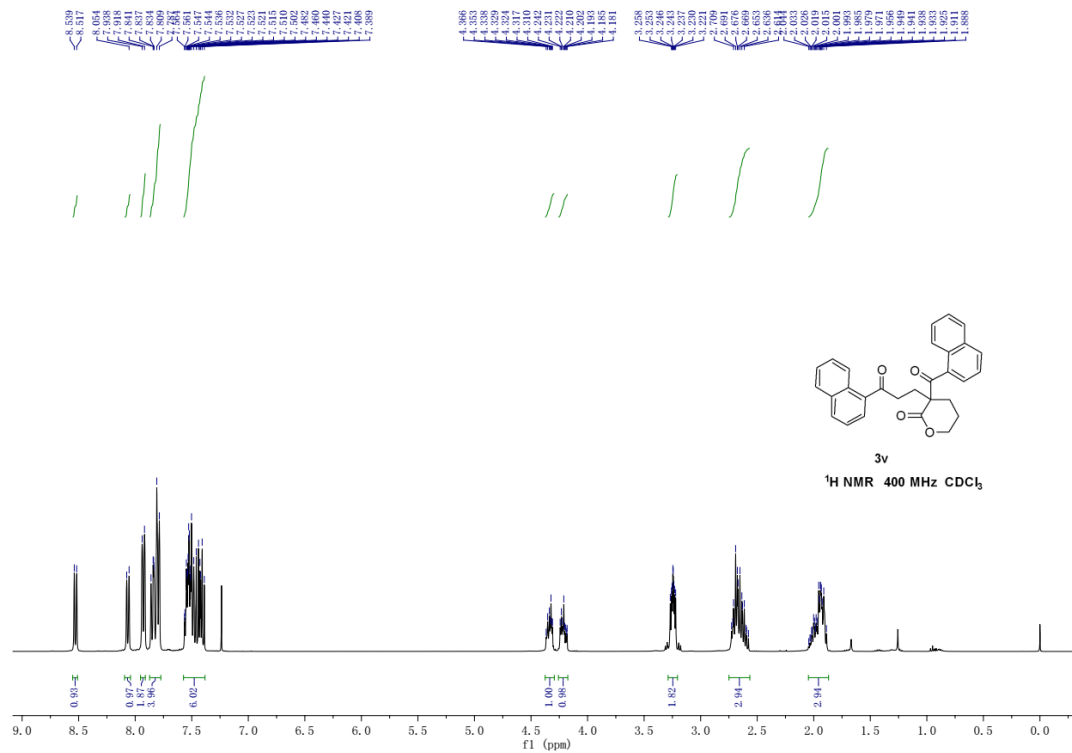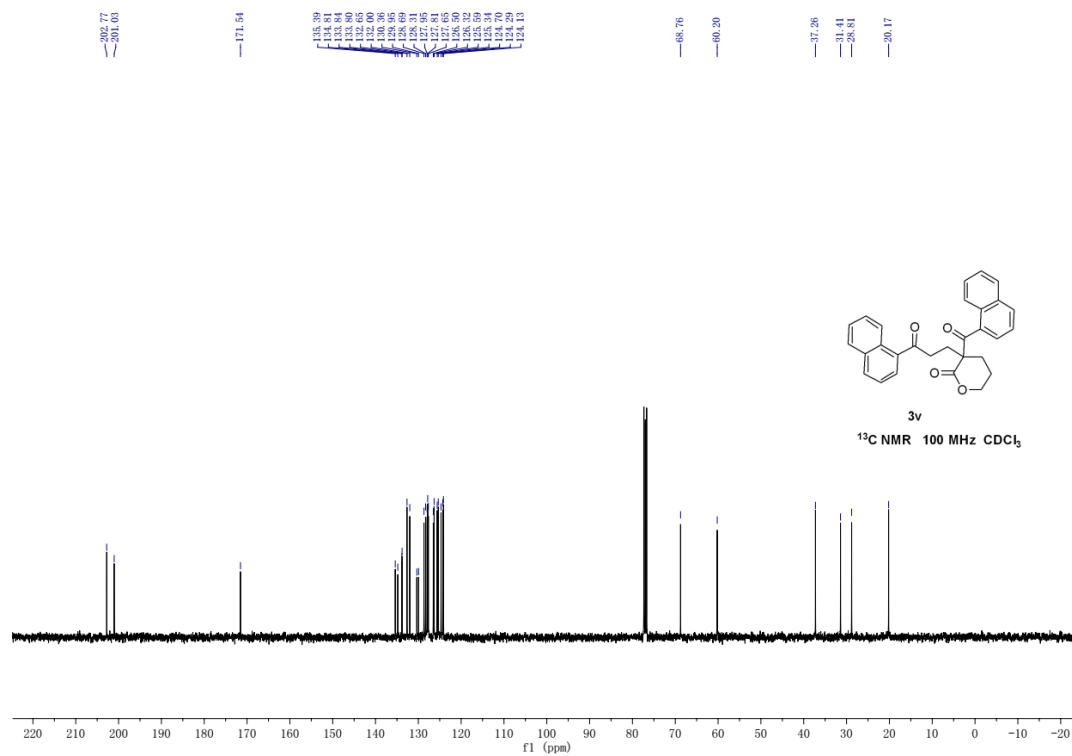







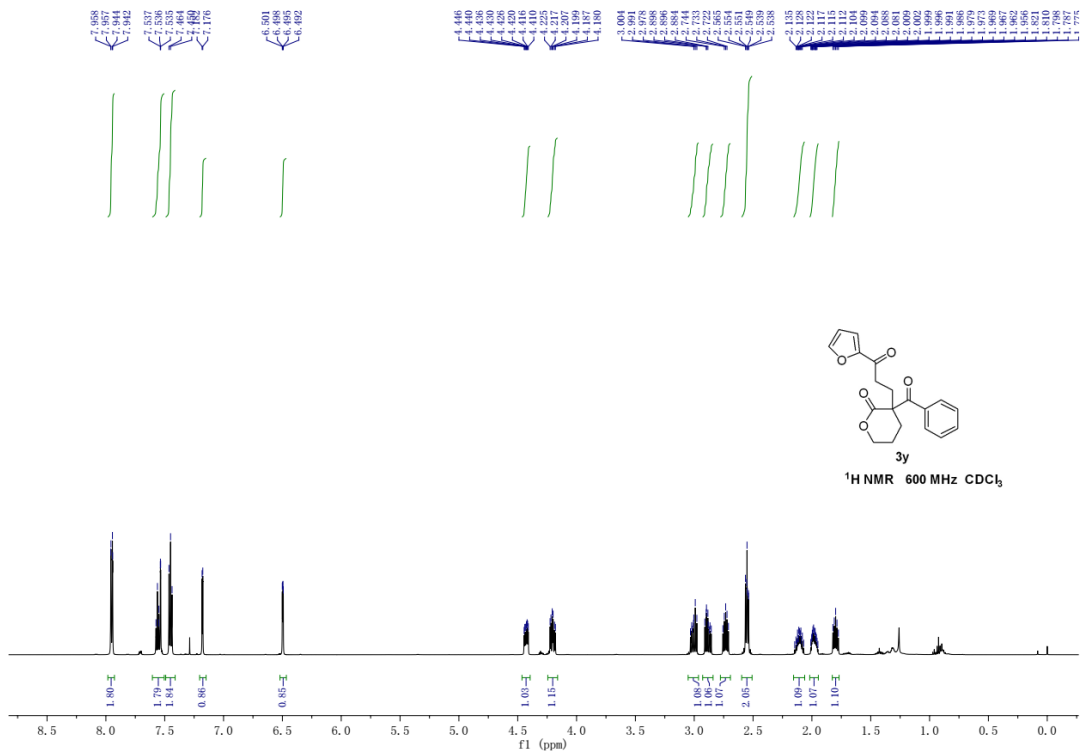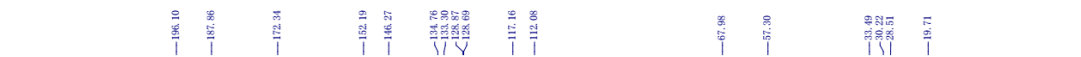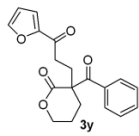

**<sup>13</sup>C NMR 150 MHz CDCl<sub>3</sub>**

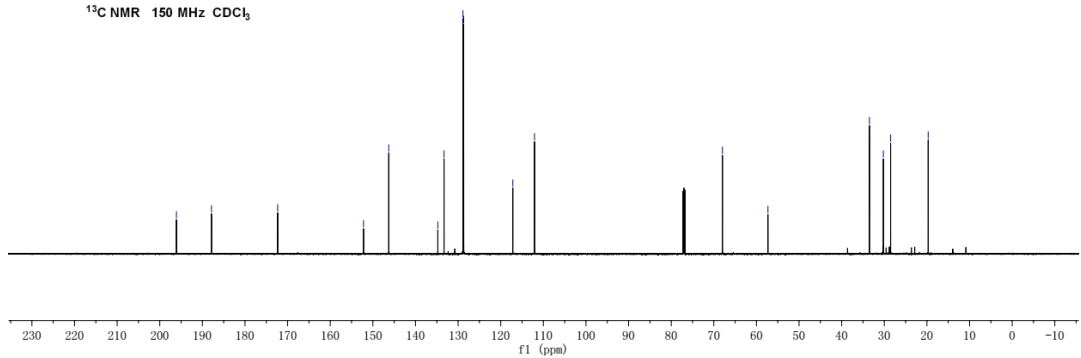



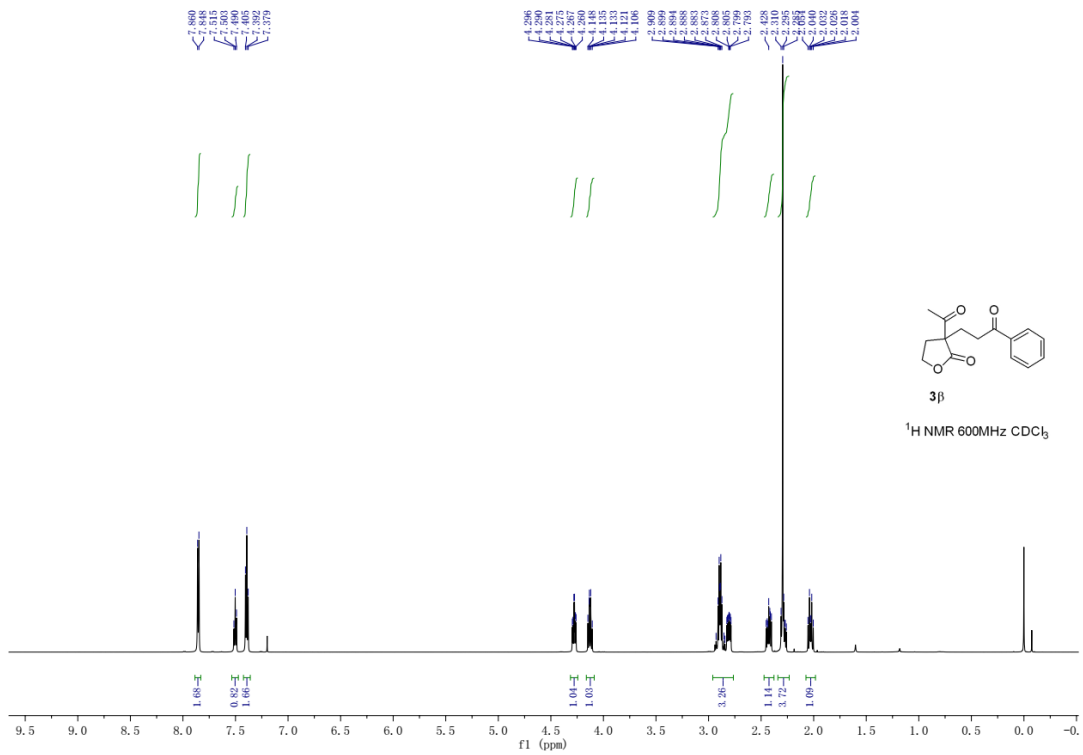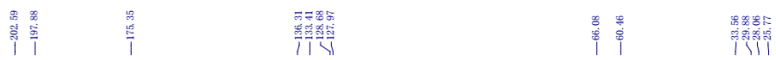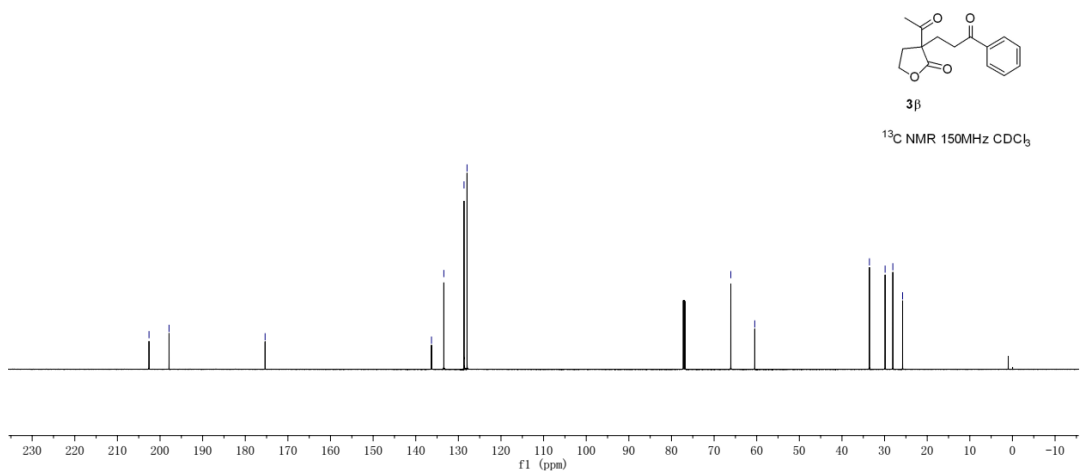

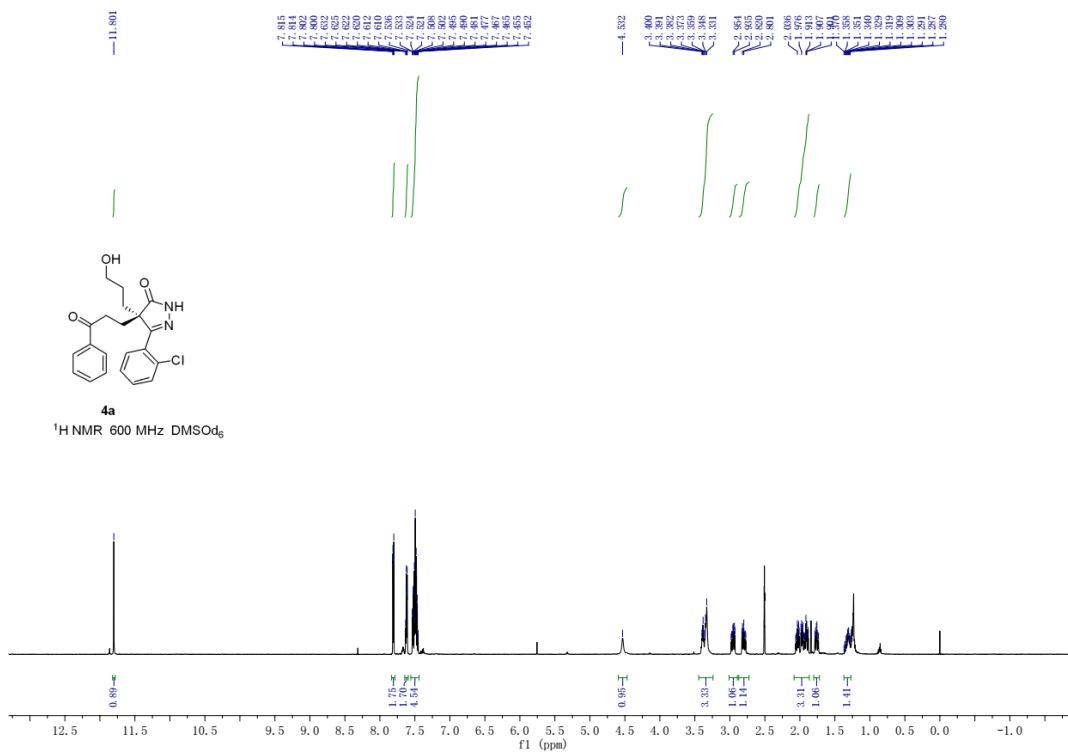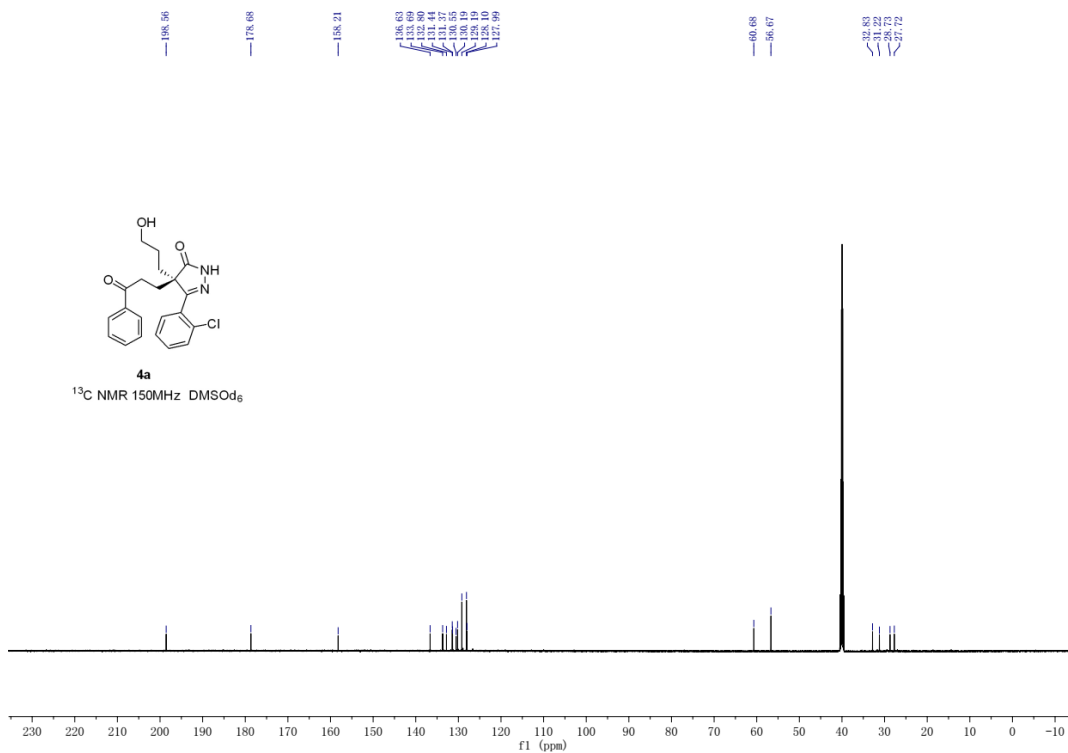

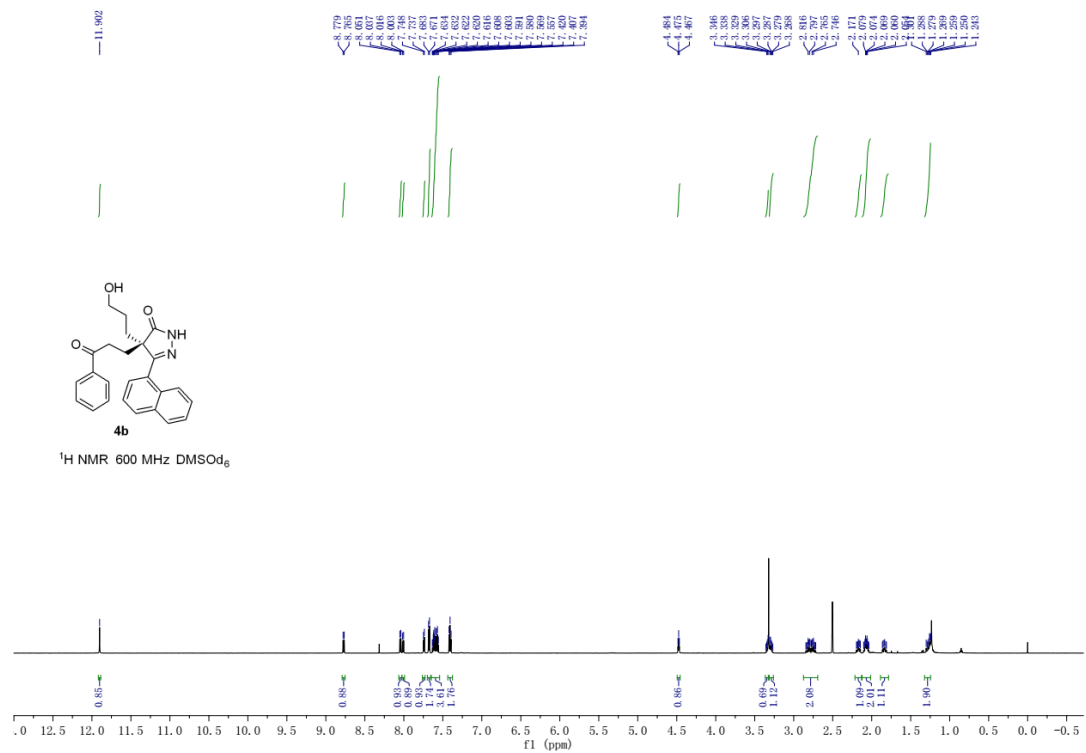

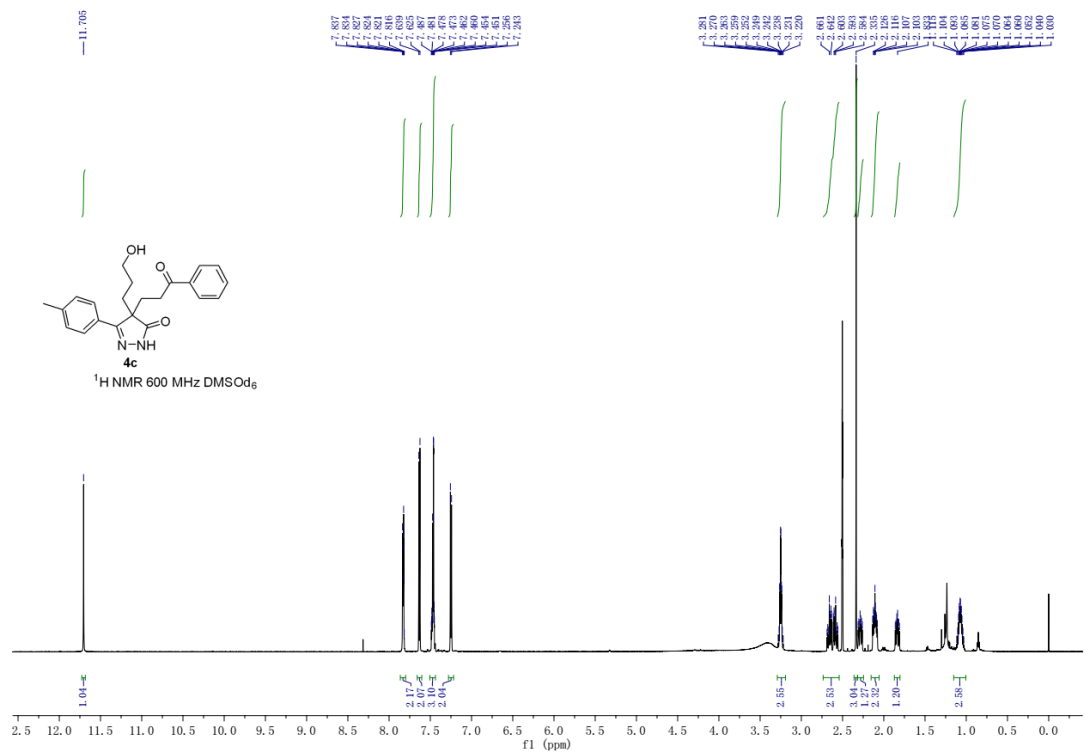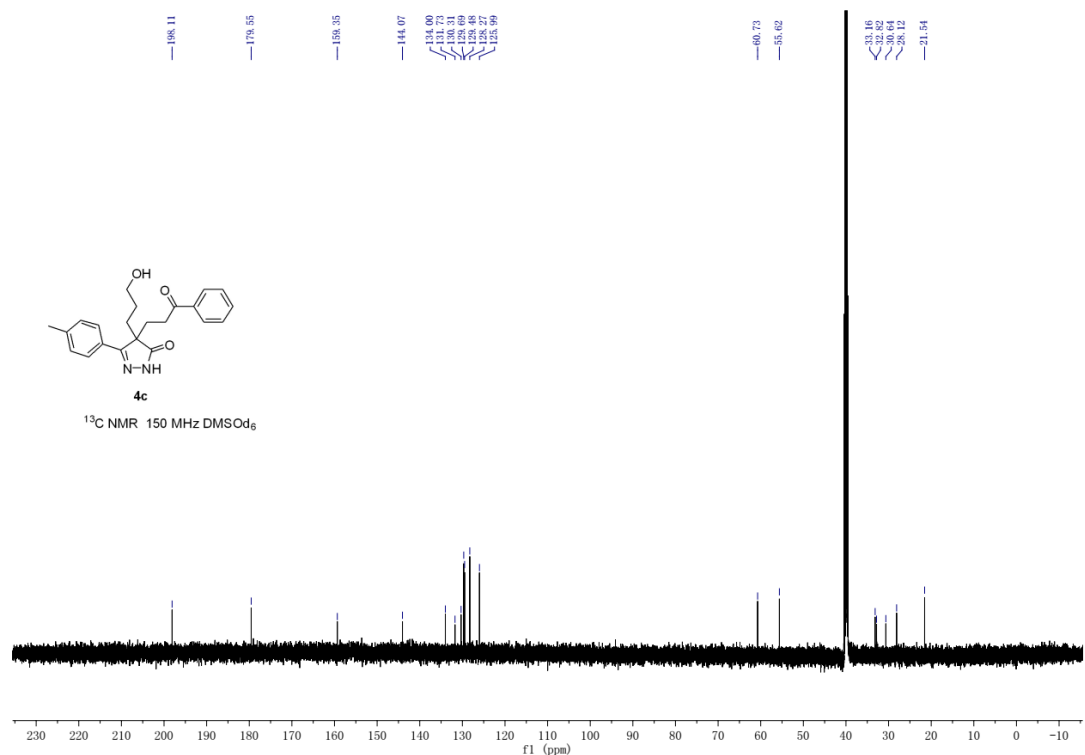

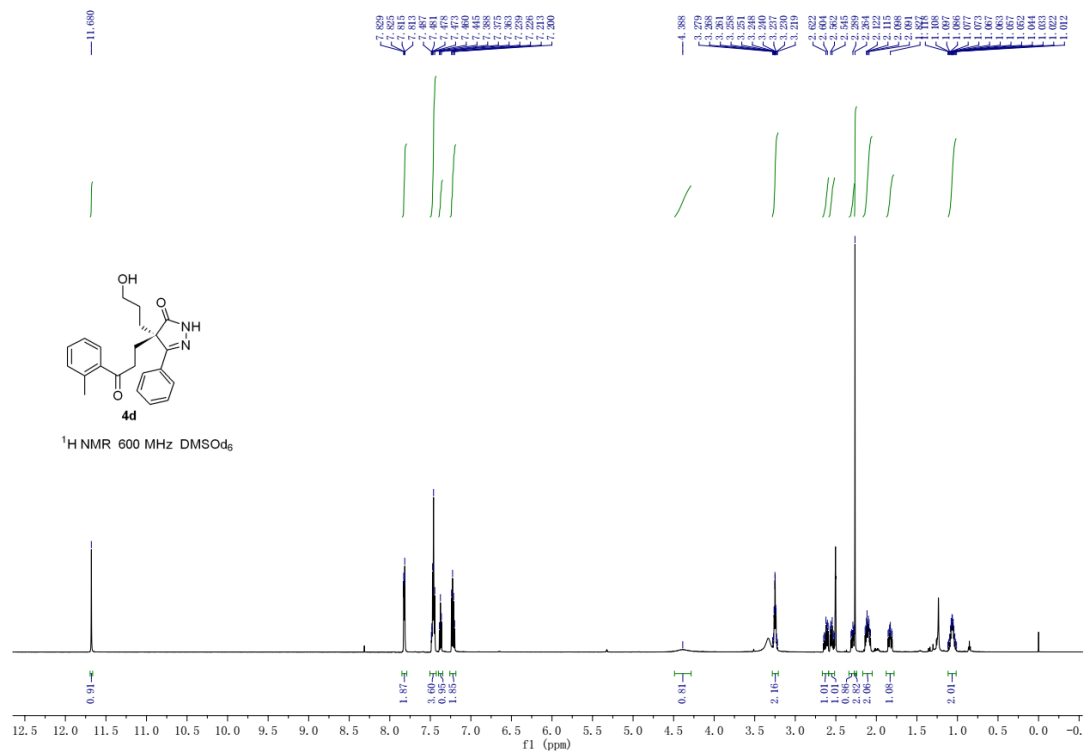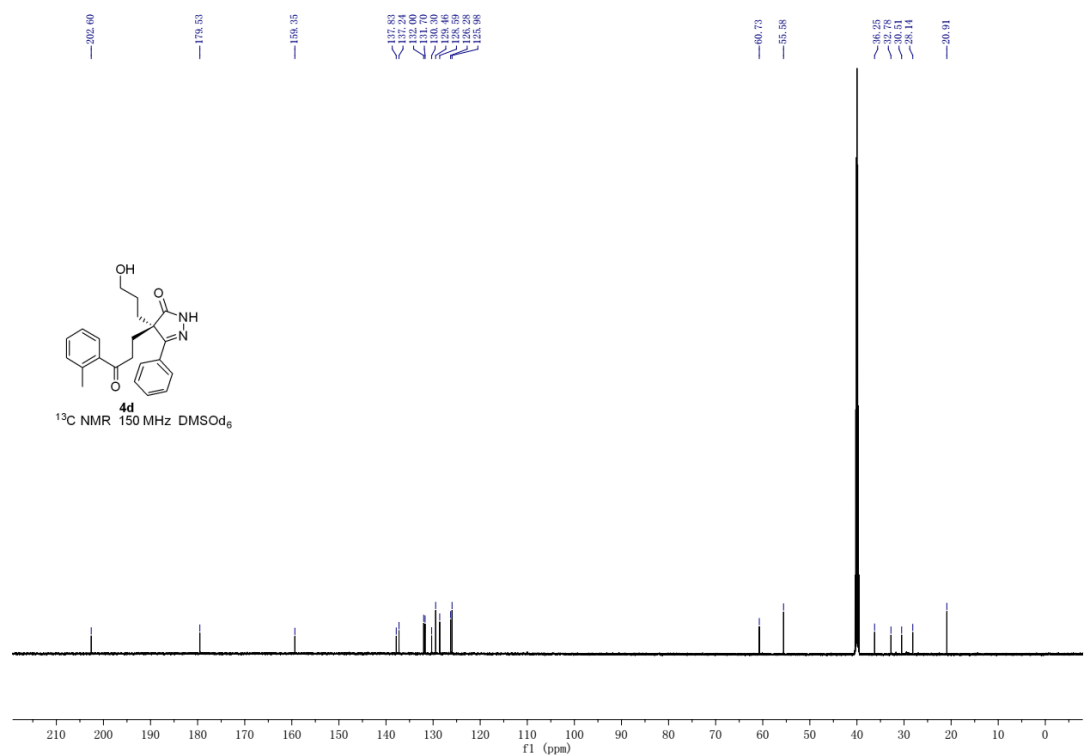





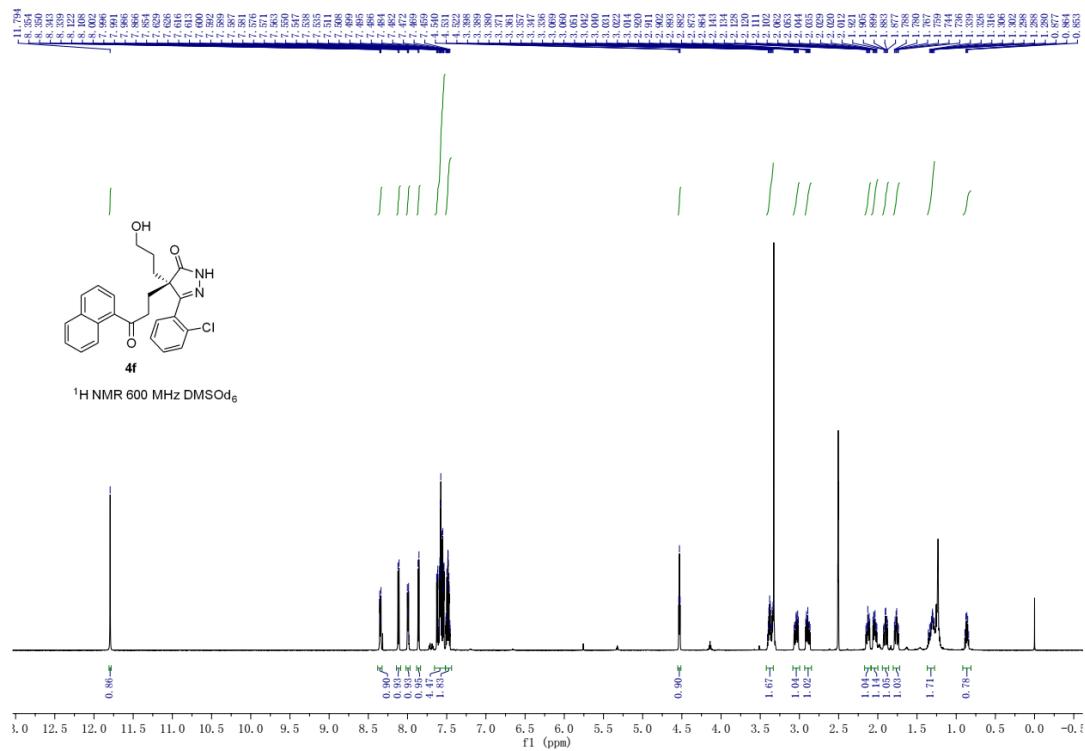

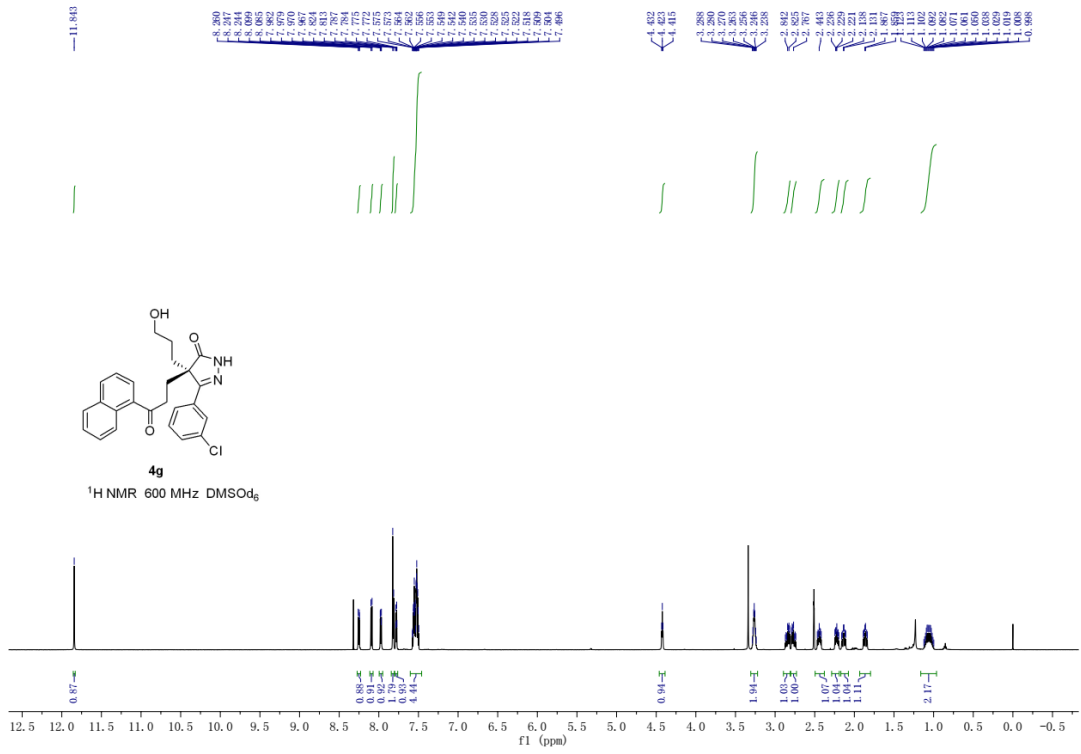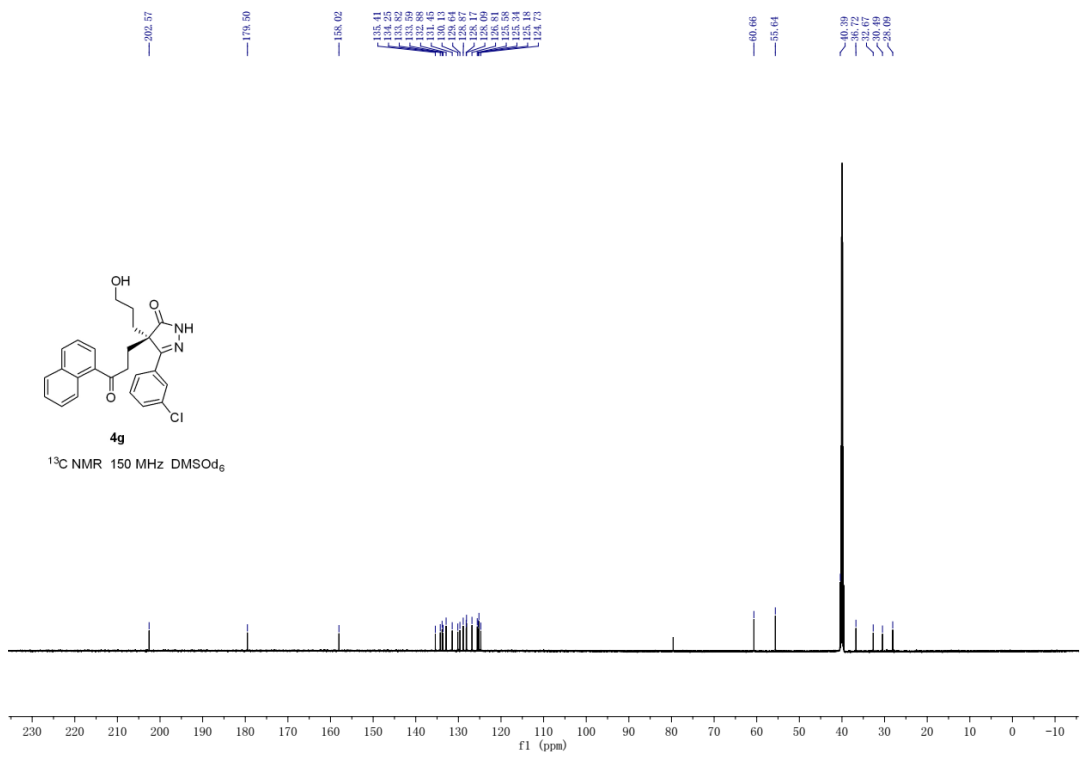

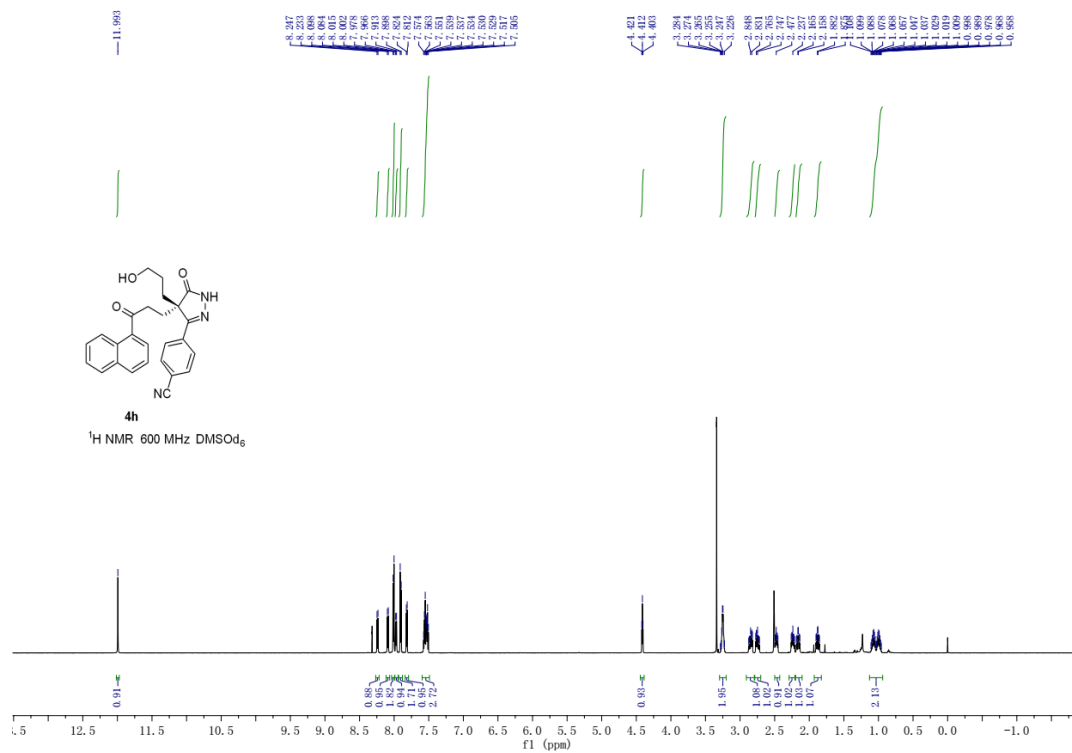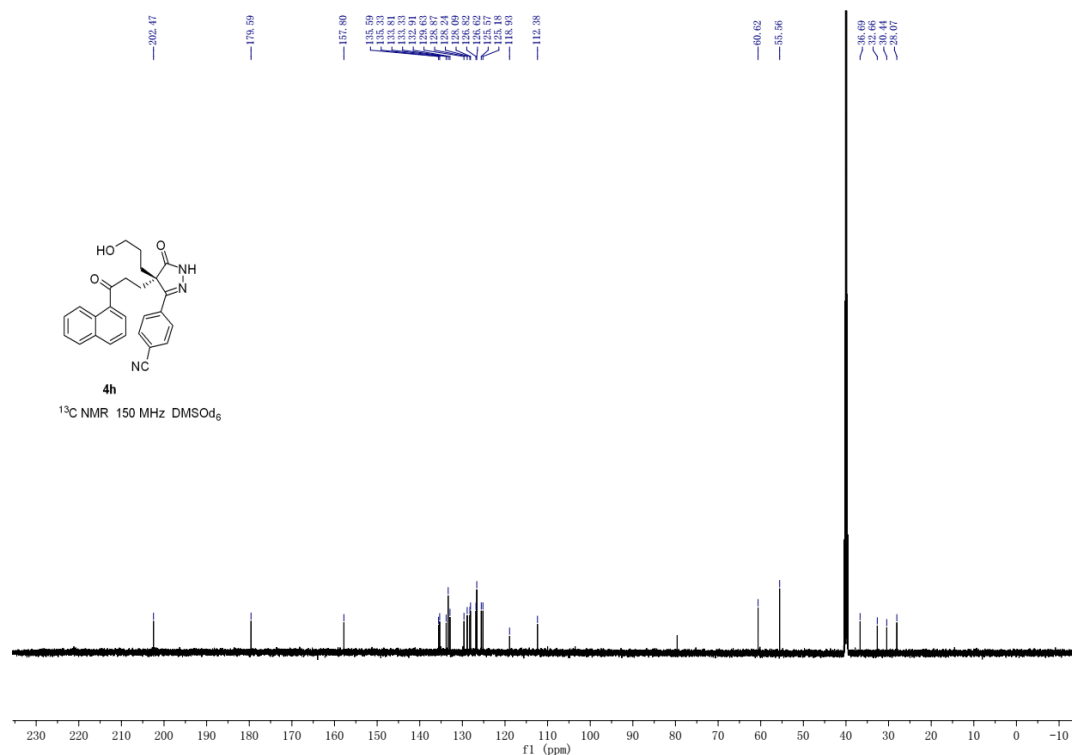



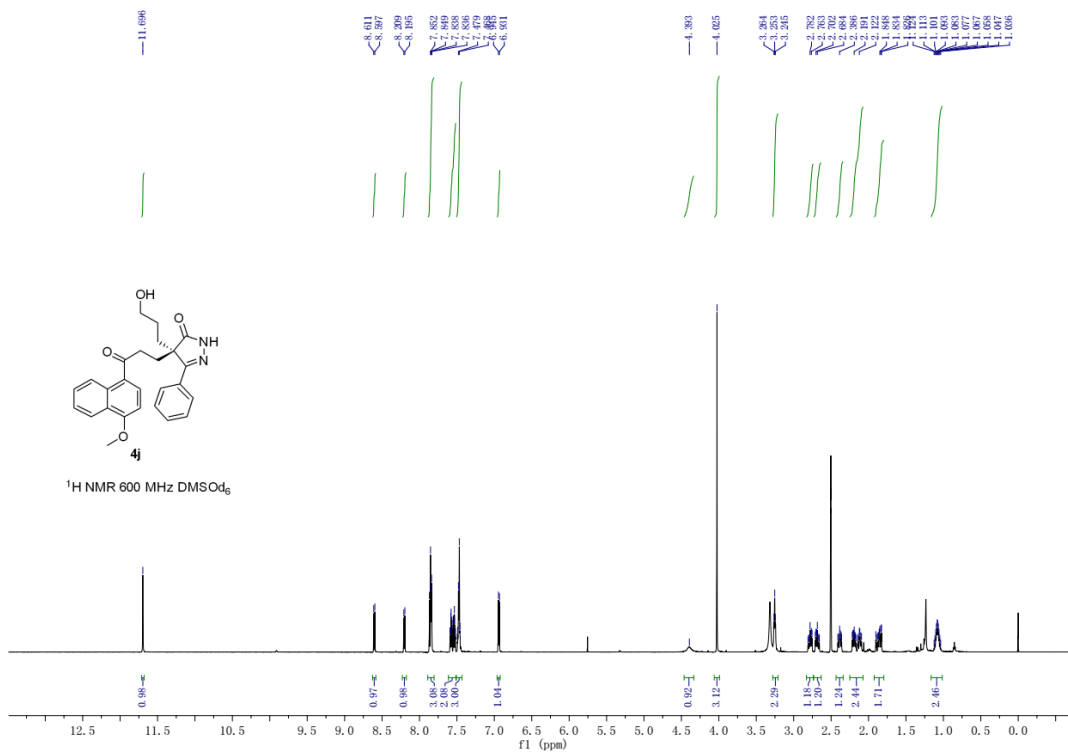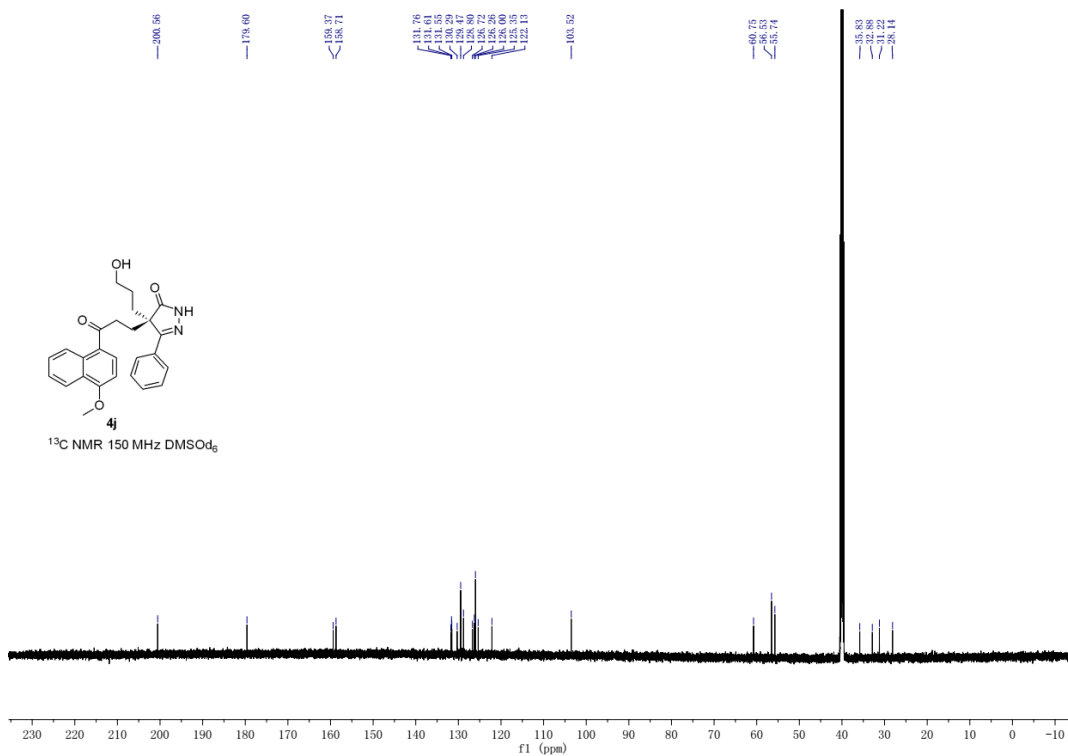

## 14 References

1. (a) A. Bertogg, L. Hintermann, D. P. Huber, M. Perseghini, M. Sanna, A. Togni, *Helvetica Chimica Acta.*, 2012, **95**, 353; (b) X. -X. Jiang, D. Fu, G. Zhang, Y. -M. Cao, L. -P. Liu, J. -J. Song, R. Wang, *Chem. Commun.*, 2010, **46**, 4294.
2. A. Bugarin, K. D. Jones, B. T. Connell, *Chem. Commun.*, 2010, **46**, 1715.
3. T. Tatsumi, T. Misaki, T. Sugimura, *Chem. Eur. J.*, 2015, **21**, 18971;
4. N. R. Amarasinghe, P. Turner, M. H. Todd, *Adv. Synth. Catal.*, 2012, **354**, 2954.
5. P. Wang, H. -F. Li, J. -Z. Zhao, Z. -H. Du, C. -S. Da, *Org. Lett.*, 2017, **19**, 2634.
6. Z. -Z. Jing, X. -B. Bai, W. -C. Chen, G. Zhang, B. Zhu, Z. -Y. Jiang, *Org. Lett.*, 2016, **18**, 260.
7. L. Li, E. G. Klauber, D. Seidel, *J. Am. Chem. Soc.*, 2008, **130**, 12248.
8. E. Veverková, S. Bilka, R. Baran, R. Šebesta, *Synthesis.*, 2016, **48**, 1474.
9. K. S. Yang, A. E. Nibbs, Y. E. Türkmen, V. H. Rawal, *J. Am. Chem. Soc.*, 2013, **135**, 16050.
